# Supplementary material for: Mlh1 deficiency in normal mouse colon mucosa associates with chromosomally unstable colon cancer
Source: PubMed Central journal article supplement — Carcinogenesis. 2018 Apr 26;39(6):788–97. doi: 10.1093/carcin/bgy056 (PMC5973430; doi:10.1093/carcin/bgy056), 2018-04-26
Supplement: bgy056_suppl_supplementary_material.pdf [file bgy056_suppl_supplementary_material.pdf]

## SUPPLEMENTARY INFORMATION

### *Mlh1* deficiency in normal mucosa associates with microsatellite stable colon cancer

Marjaana Pussila<sup>1</sup>, Petri Törönen<sup>2</sup>, Elisabet Einarsdottir<sup>3,4</sup>, Shintaro Katayama<sup>3</sup>, Kaarel Krjutškov<sup>3,4,5</sup>,  
Liisa Holm<sup>1,2</sup>, Juha Kere<sup>3,4,6</sup>, Päivi Peltomäki<sup>7</sup>, Markus J. Mäkinen<sup>8,9</sup>, Jere Linden<sup>10</sup>, Minna Nyström<sup>1\*</sup>

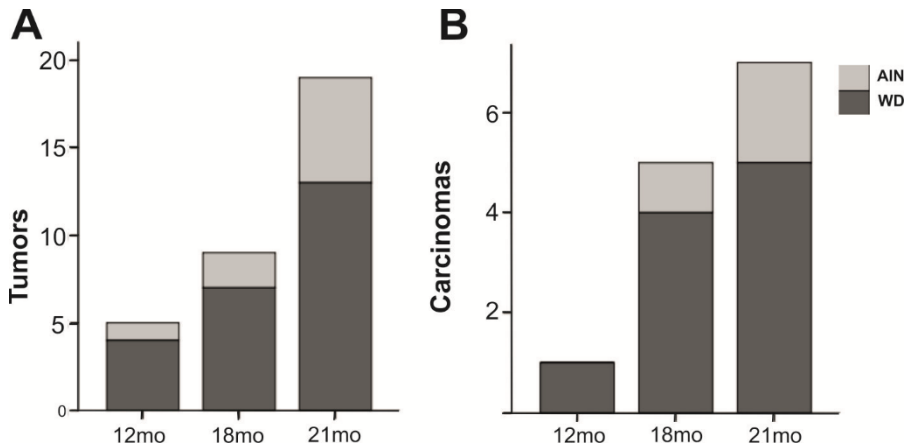

### **Supplementary figure 1. Number of colon tumors and carcinomas in different age and diet groups.**

Aging and Western-style diet increased the total number of (A) colon tumors and (B) carcinomas. AIN (AIN-93G control diet), WD (Western-style diet).

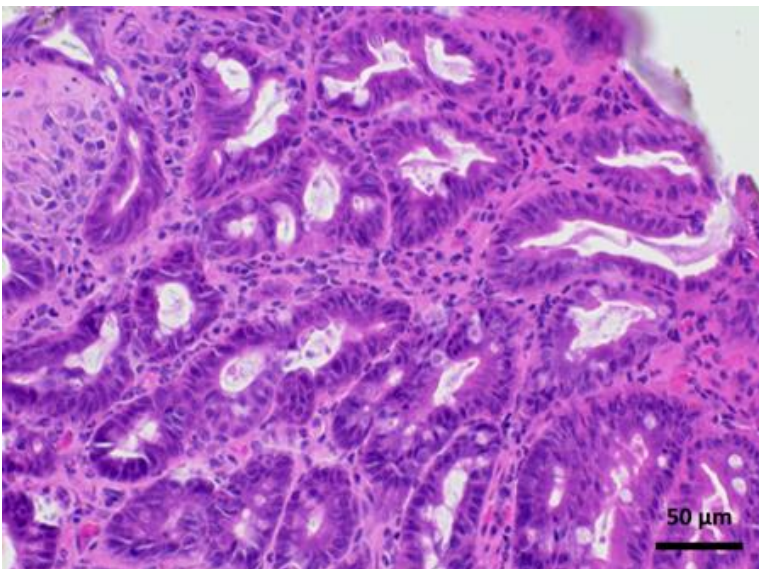

### **Supplementary figure 2. Histopathology of serrated adenocarcinoma E347**

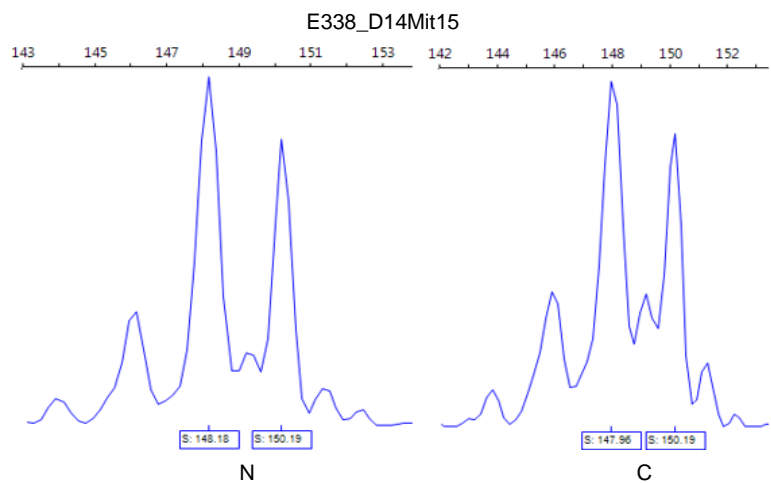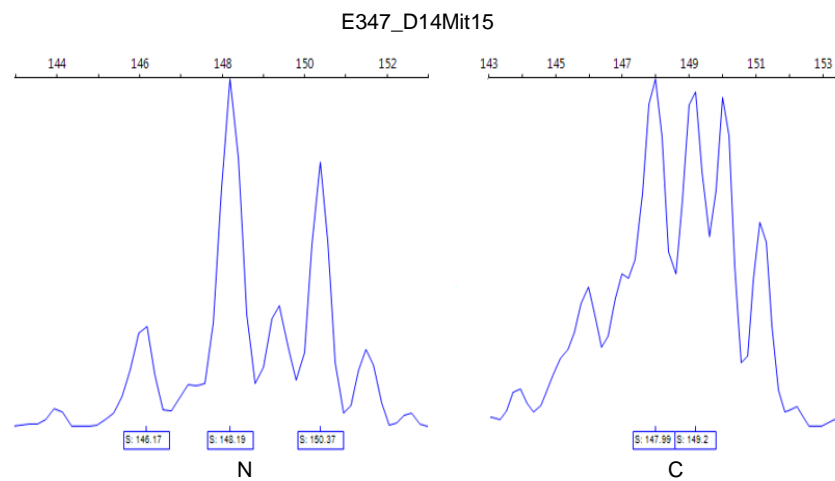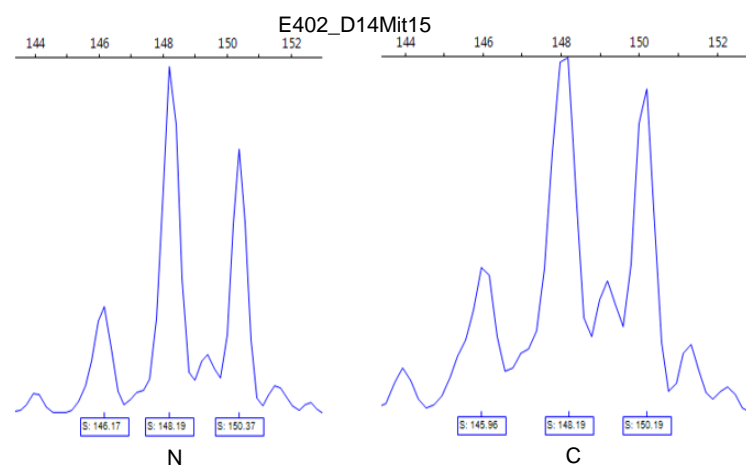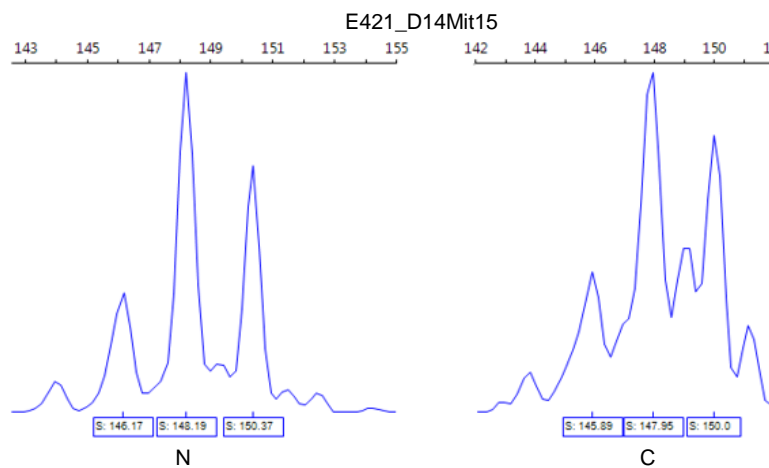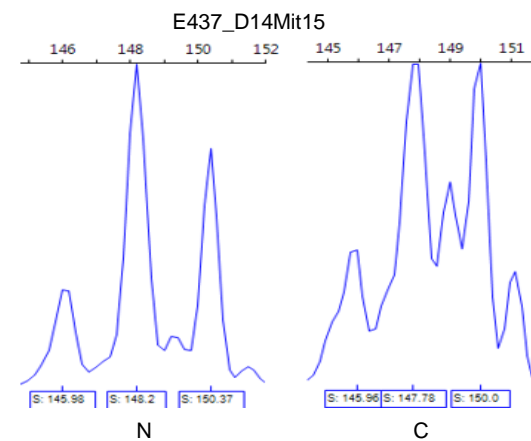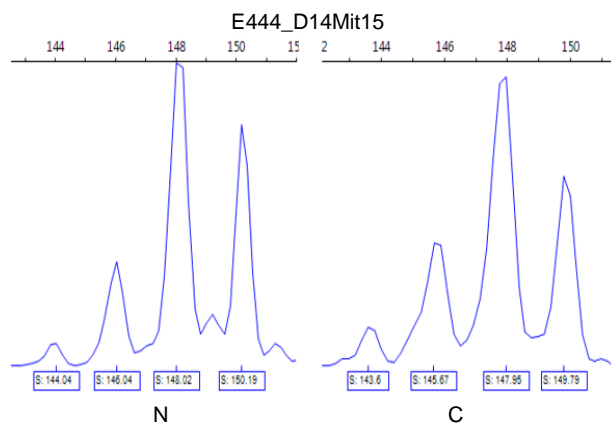

E338\_D18Mit15

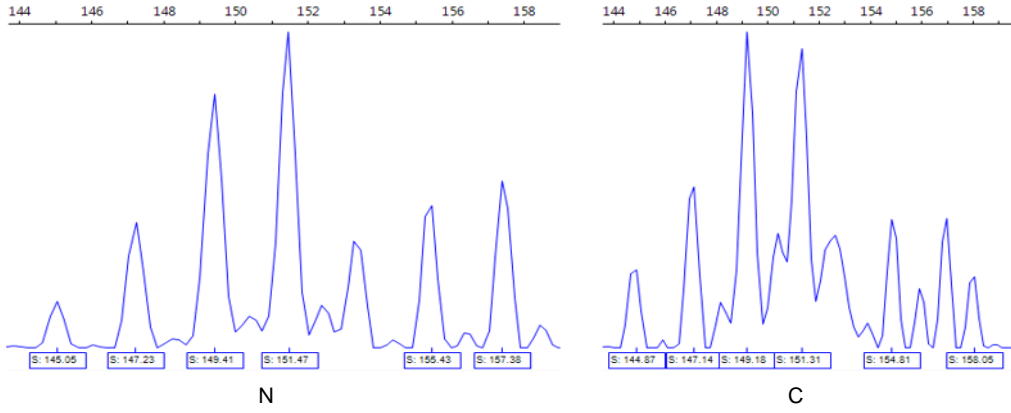

E347\_D18Mit15

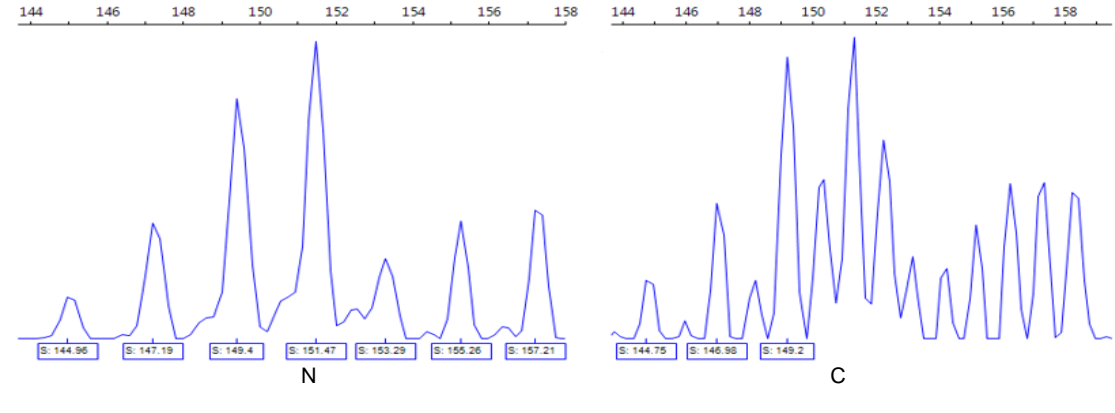

E402\_D18Mit15

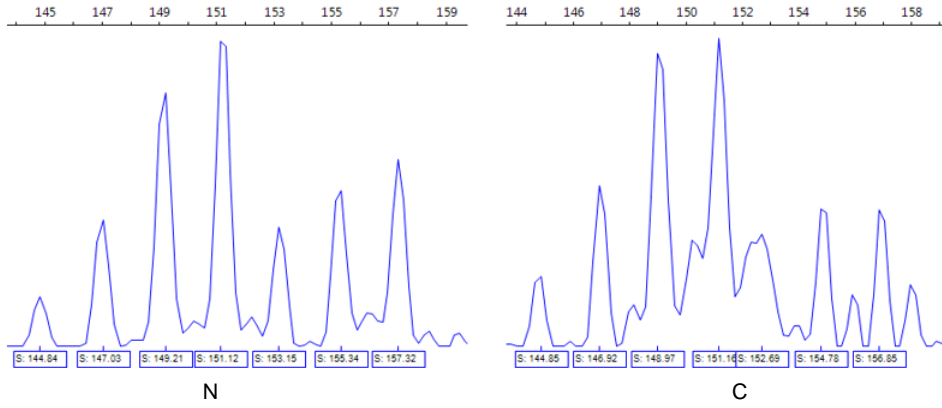

E421\_D18Mit15

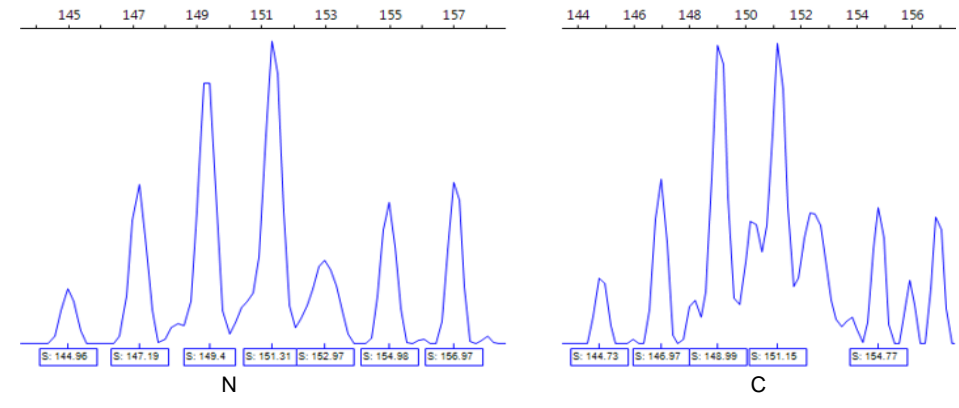

E444\_D18Mit15

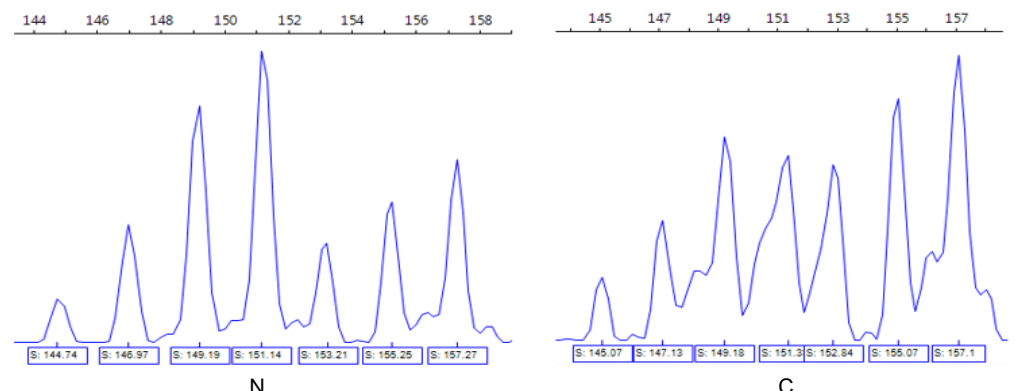

E338\_D7Mit91

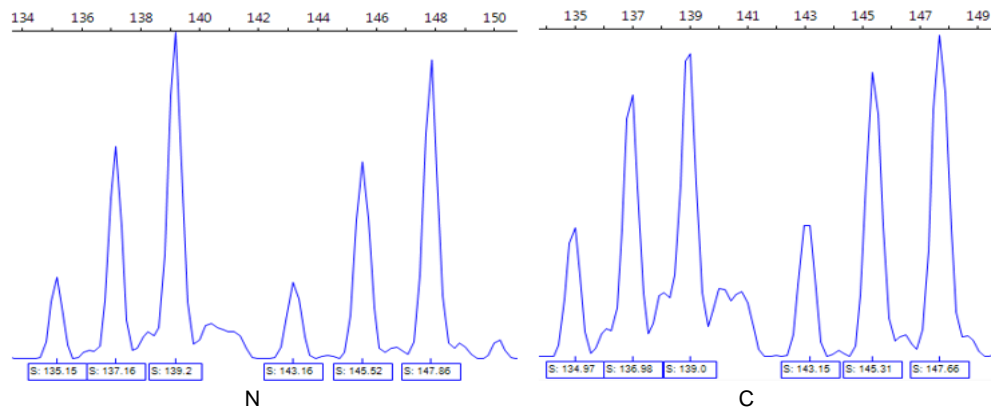

E347\_D7Mit91

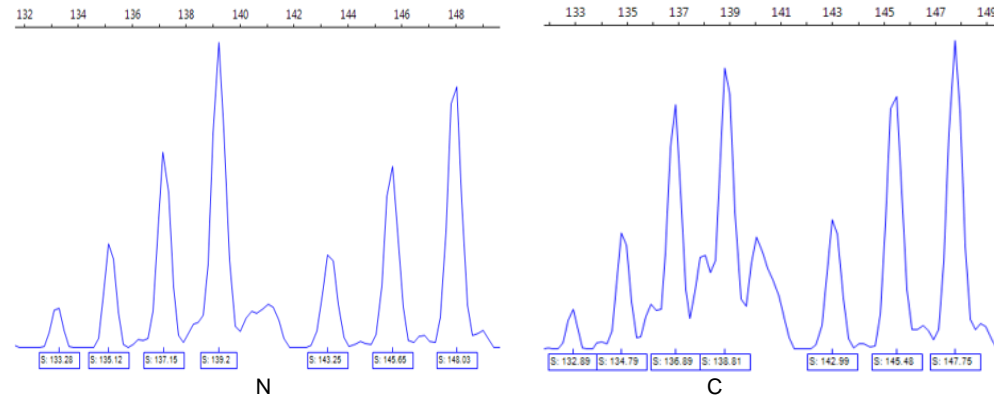

E402\_D7Mit91

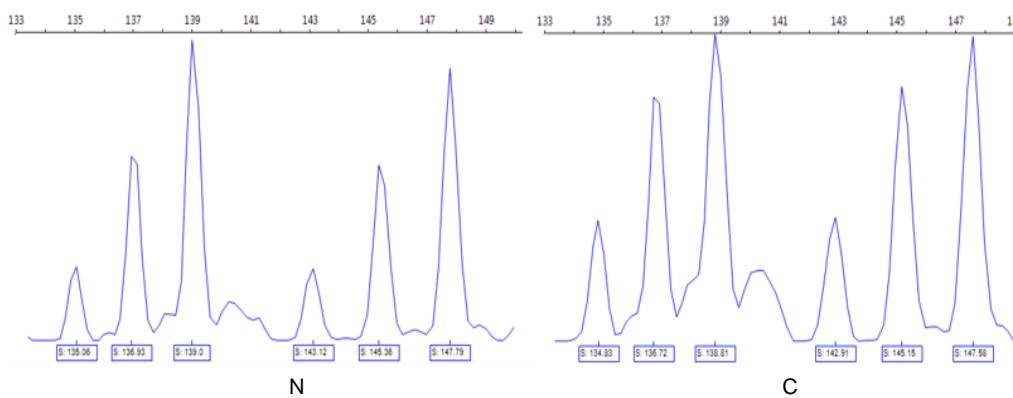

E421\_D7Mit91

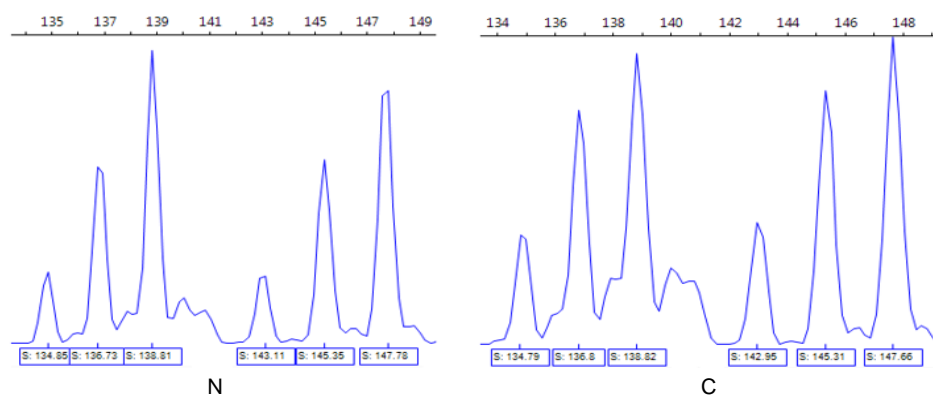

E437\_D7Mit91

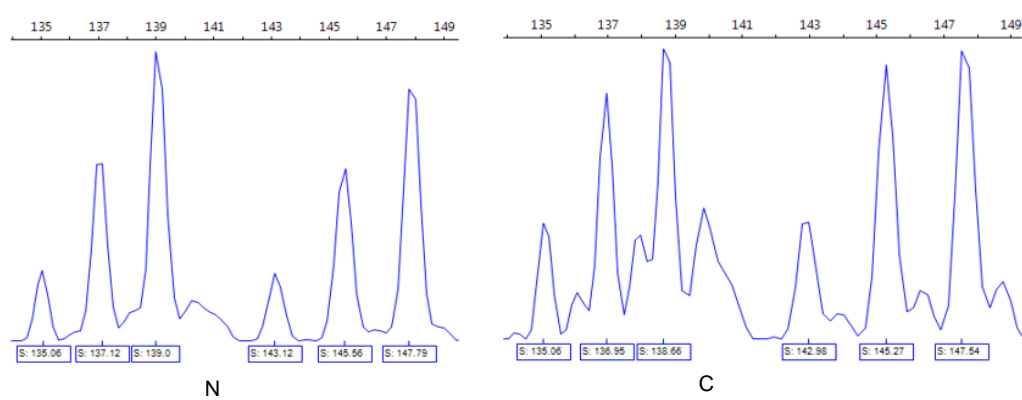

E444\_D7Mit91

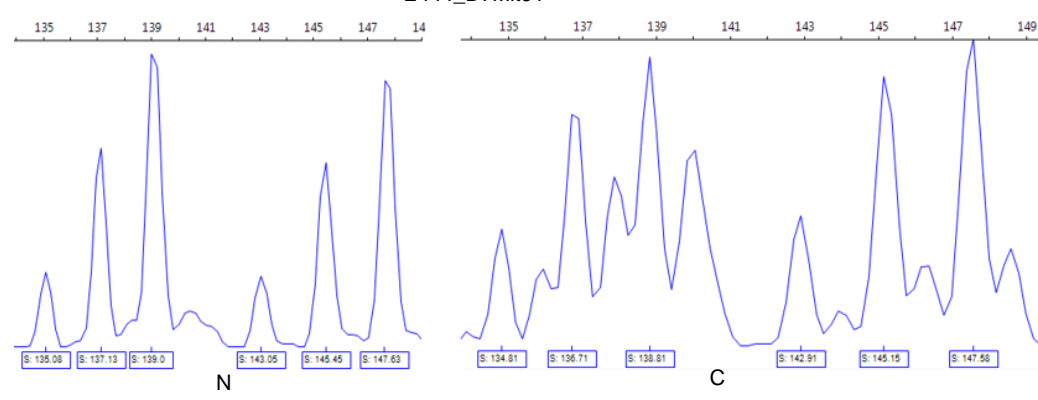

E338\_D10Mit2

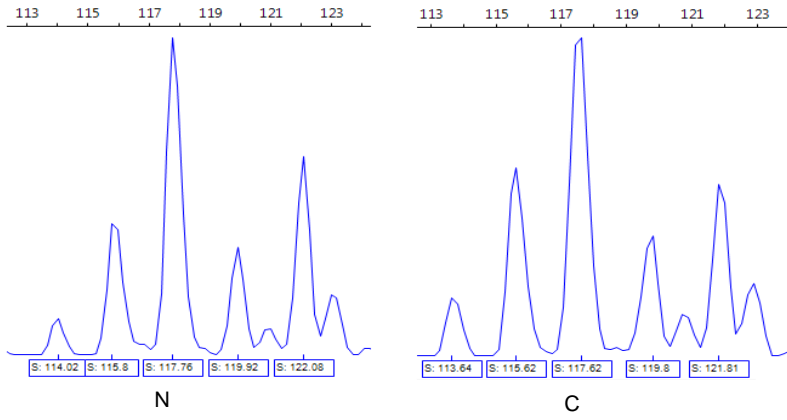

E347\_D10Mit2

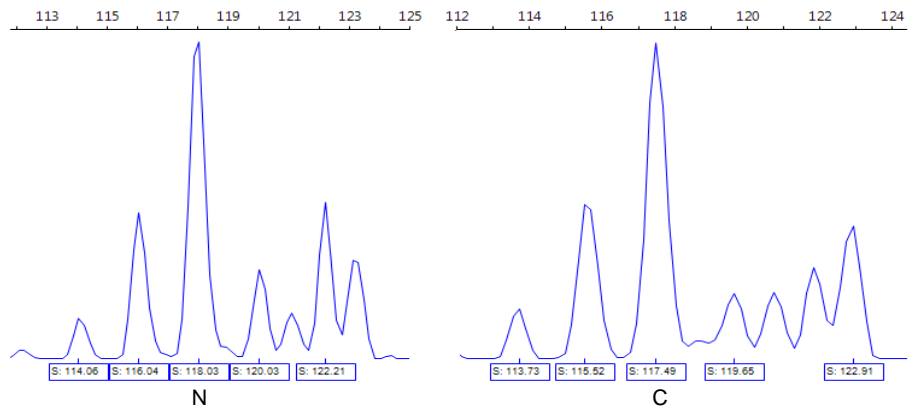

E402\_D10Mit2

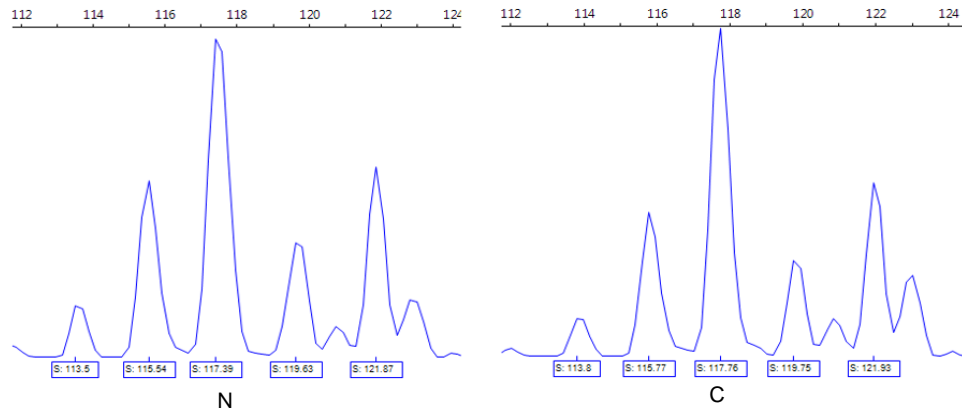

E421\_D10Mit2

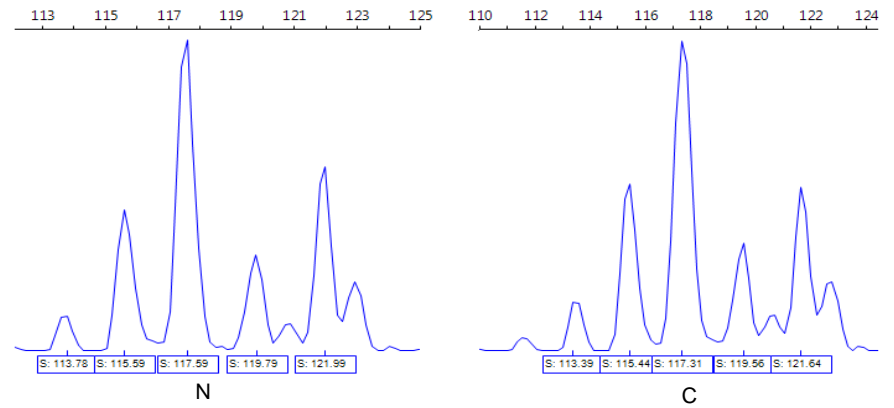

E444\_D10Mit2

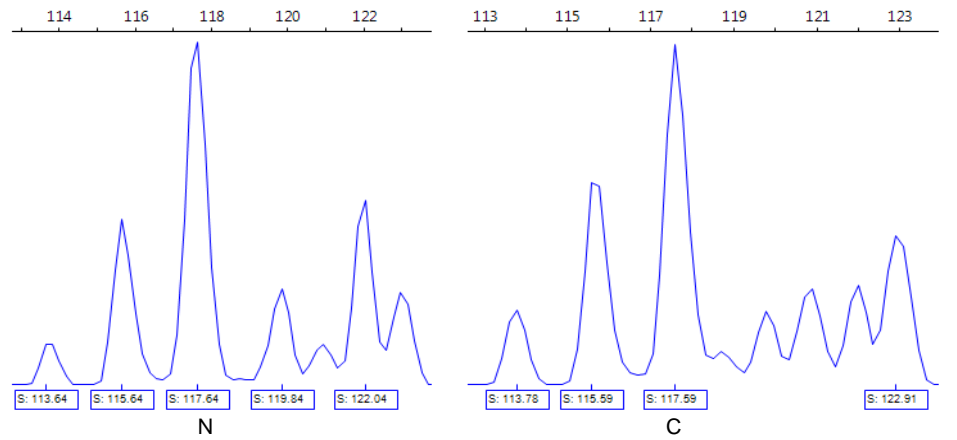

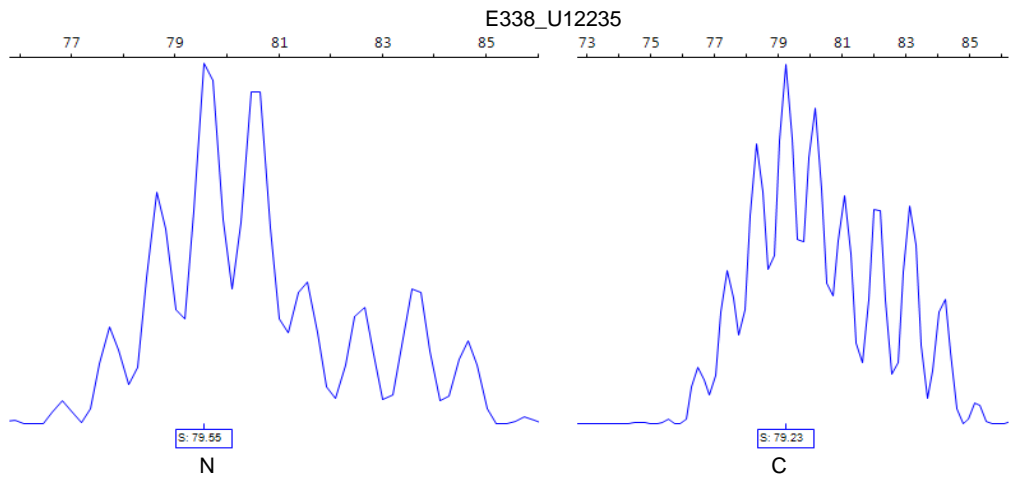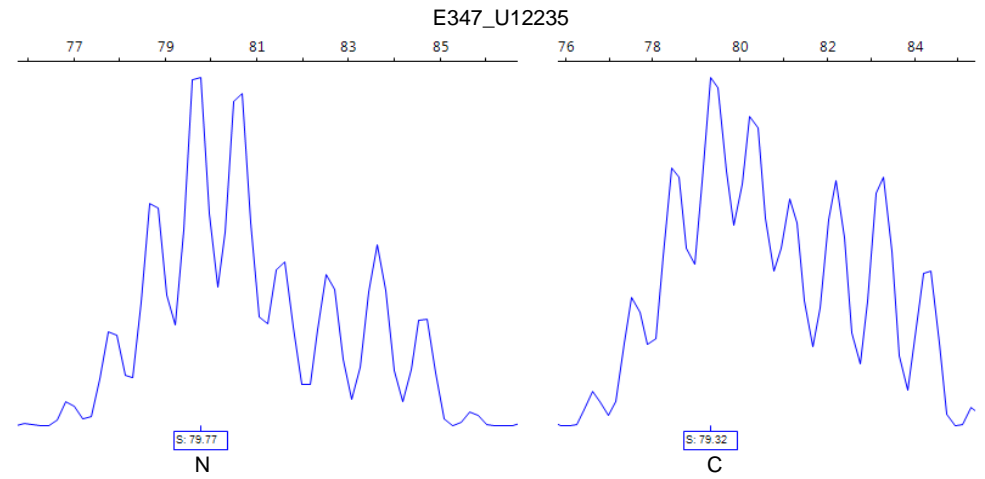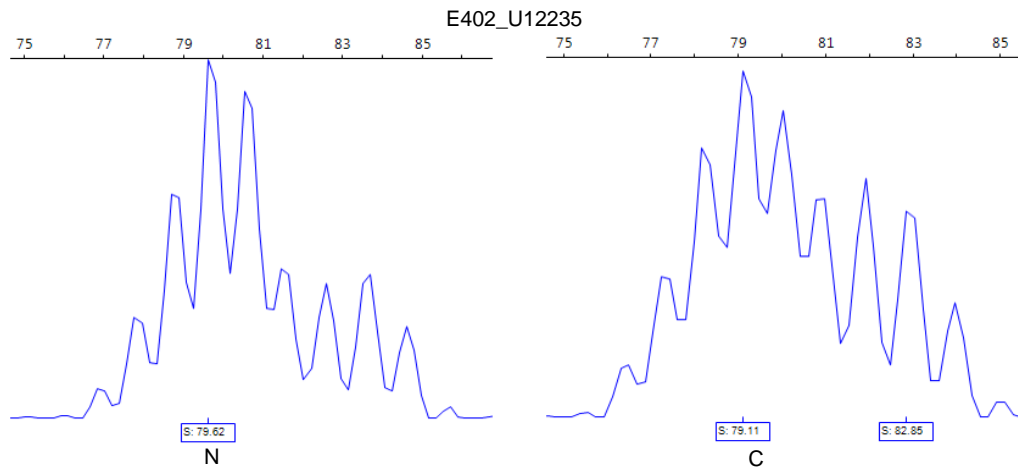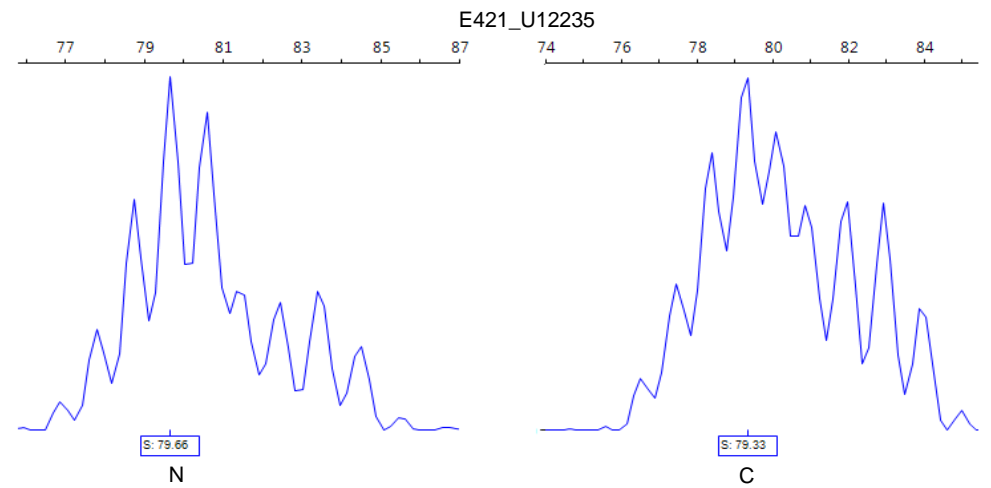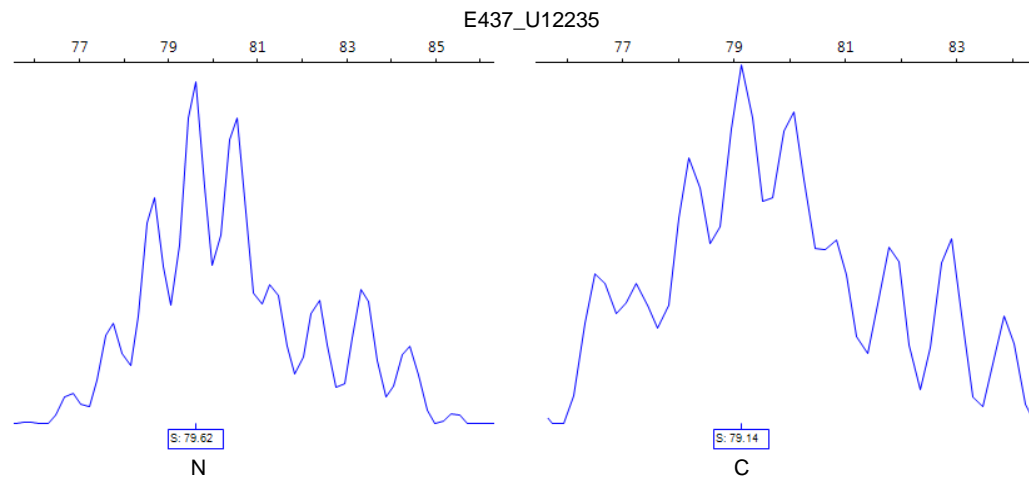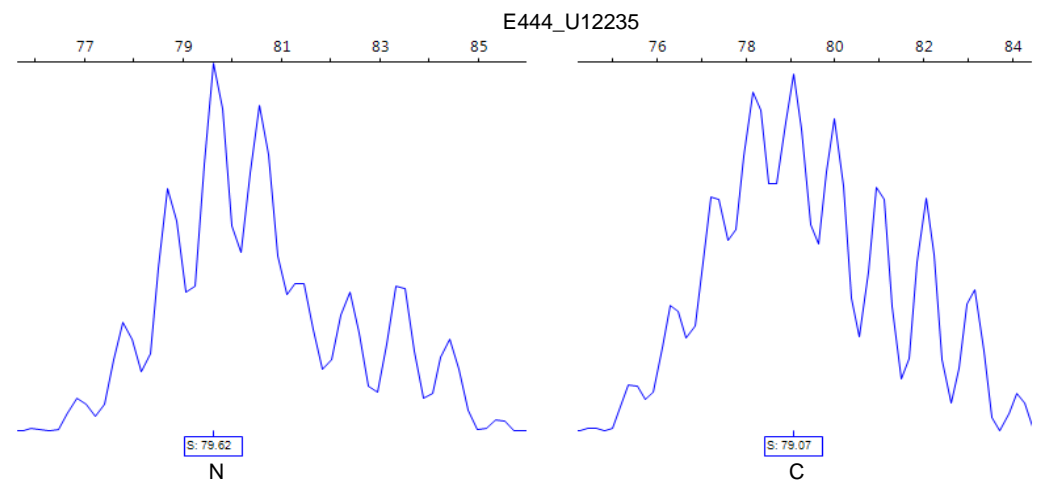

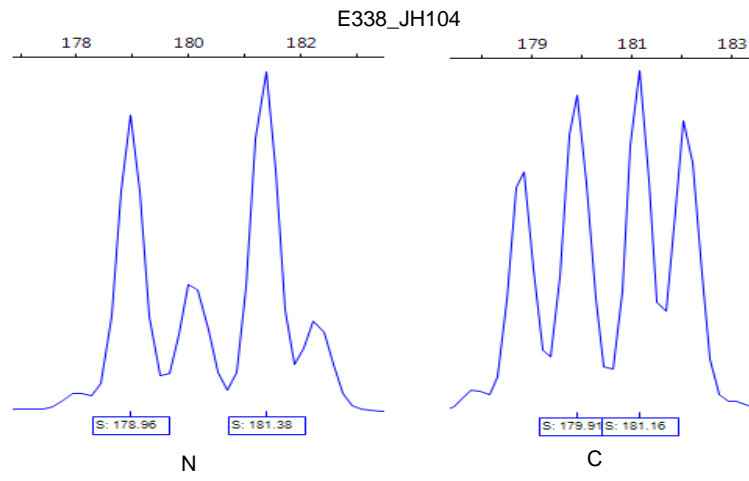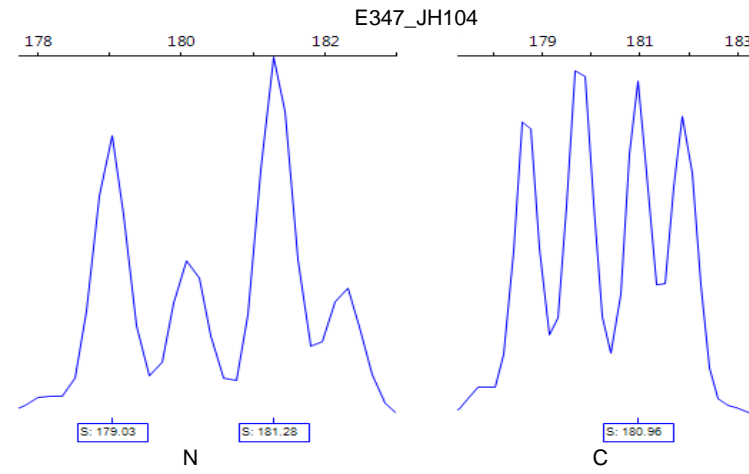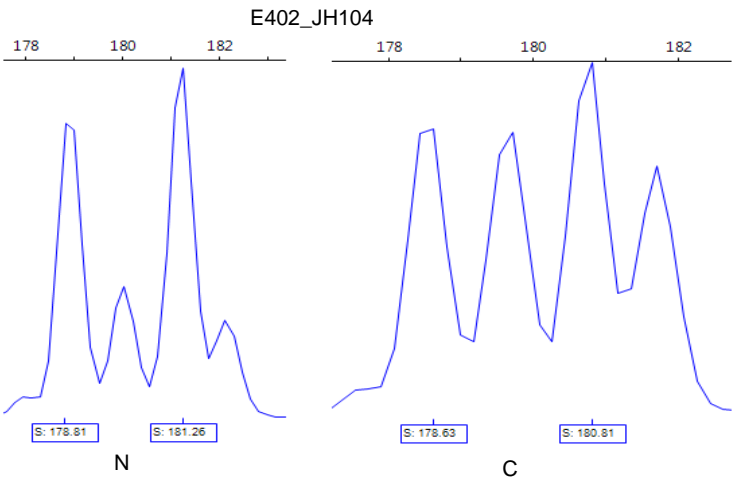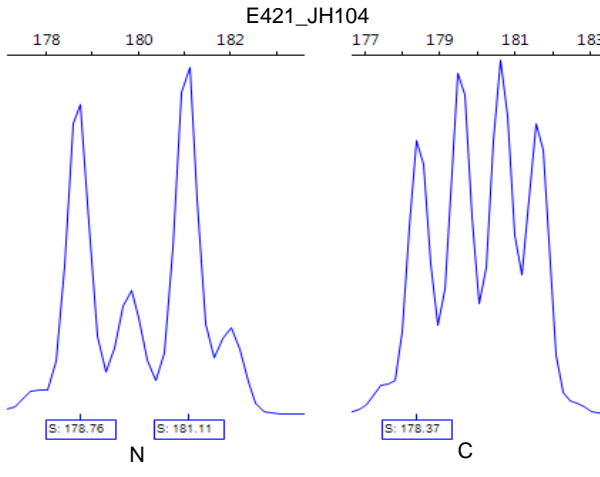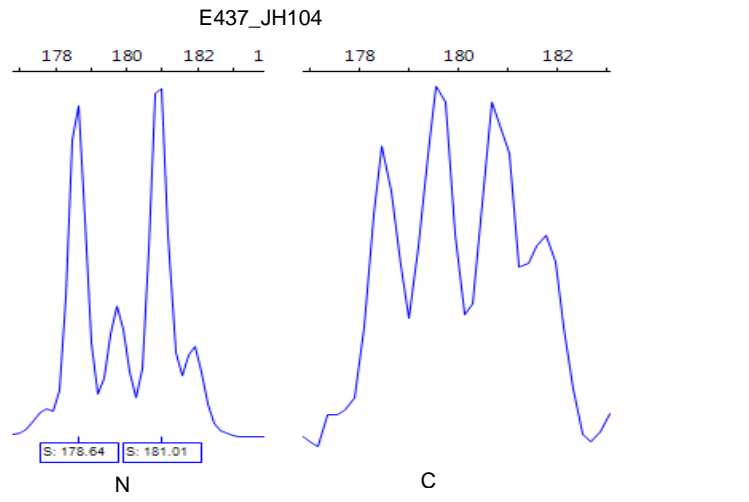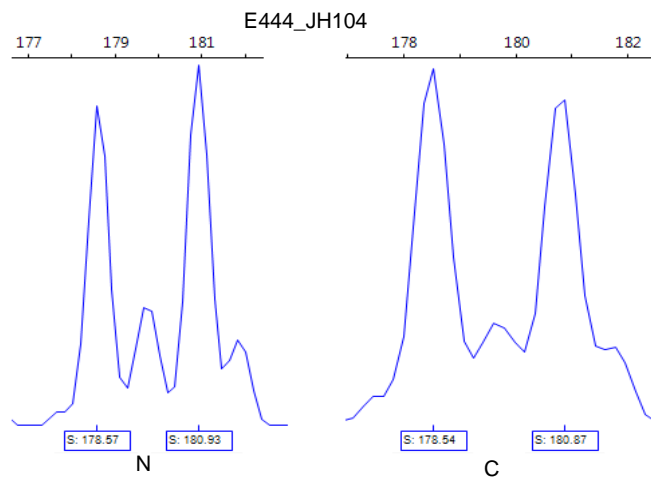

**Supplementary figure 3. MSI analysis of four dinucleotide and two mononucleotide markers in carcinomas**

N = normal, C = carcinoma

**Supplementary Table 1: Diet nutritional content**

|                                      | <b>AIN93-G</b>  | <b>WD</b>                     |
|--------------------------------------|-----------------|-------------------------------|
| <b>Total energy content (kcal/g)</b> | 3.8             | 4.6                           |
| Kcal from carbohydrates (%)          | 63.9            | 42.3                          |
| Kcal from protein (%)                | 18.8            | 18.5                          |
| Kcal from fat (%)                    | 17.2            | 39.2                          |
| <b>Carbohydrate source (g/kg)</b>    |                 |                               |
| Starch                               | 397             | 306                           |
| Maltodextrin                         | 132             | 95                            |
| Sucrose                              | 100             | 116                           |
| <b>Protein source (g/kg)</b>         | 200<br>(casein) | 232<br>(casein, vitamin free) |
| <b>Fat source (g/kg)</b>             |                 |                               |
| Soybean oil                          | 70              | -                             |
| Anhydrous milkfat                    | -               | 133                           |
| Canola oil                           | -               | 55                            |
| Sunflower oil                        | -               | 12                            |
| <b>Vitamin D (IU/kg)</b>             | 1000            | 100                           |
| <b>Folic acid (mg/kg)</b>            | 2               | 0.2                           |
| <b>Calcium (g/kg)</b>                | 5               | 0.5                           |
| <b>Fiber (cellulose) (g/kg)</b>      | 50              | 20                            |



## Supplementary Table 2: histopathology grading criteria

### Hyperplasia

Epithelial hyperplasia was characterized by localized increase in mucosal thickness, long uniform crypts with increased cell proliferation, and no atypia.

### Adenoma

Adenomas were classified either tubular or tubulovillous/papillary adenomas, and the degree of dysplasia was graded in low- and high-grade dysplasia.

In adenomas with low-grade dysplasia, distorted and irregularly distributed crypt structures were composed of proliferating epithelium showing nuclear crowding and pseudostratification. The nuclear features of low-grade dysplasia consisted of mild to moderate increase in nuclear size, granular chromatin and discernible nucleoli.

In adenomas with high-grade dysplasia, the crypt structures were disorganized and often packed, with cribriform areas. The cells showed increased atypia, irregular nuclei with coarse chromatin and enlarged, conspicuous nucleoli.

### Carcinoma

In carcinomas, there were signs of invasion. Some of the cases were early cancers, with limited submucosal invasion. Invasion was characterized by displacement of malignant glands between the muscularis mucosa, submucosal vascular structures or by pushing border –type invasion with tumor extending to submucosal level or beyond.

|                             | <b>Architectural disorganization</b> | <b>Nuclear pseudo-stratification</b> | <b>Nuclear atypia</b> | <b>Chromatin</b> | <b>Nucleoli</b> |
|-----------------------------|--------------------------------------|--------------------------------------|-----------------------|------------------|-----------------|
| <b>Normal</b>               | none                                 | no                                   | no                    | even             | inconspicuous   |
| <b>Hyperplasia</b>          | none                                 | crypt basis                          | no                    | even             | inconspicuous   |
| <b>Low-grade dysplasia</b>  | mild                                 | mild to moderate                     | mild                  | granular         | present         |
| <b>High-grade dysplasia</b> | moderate to marked                   | moderate to marked                   | marked                | coarse           | conspicuous     |
| <b>Adenocarcinoma</b>       | marked to severe                     | variable                             | marked                | coarse           | conspicuous     |

## Evaluation of the RNA-seq preprocessing steps

Data was found to be difficult for preprocessing as it contained surprisingly many zero values (~57%) and many low counts (68% below 4 counts). First evaluation is done by visualizing the percentiles from each library. Data is shown with shifted log ( $x_{log} = \log(x + 1)$ ). The aim of this visualization is to ensure that counts are comparable across the libraries. First we evaluated the raw count data:

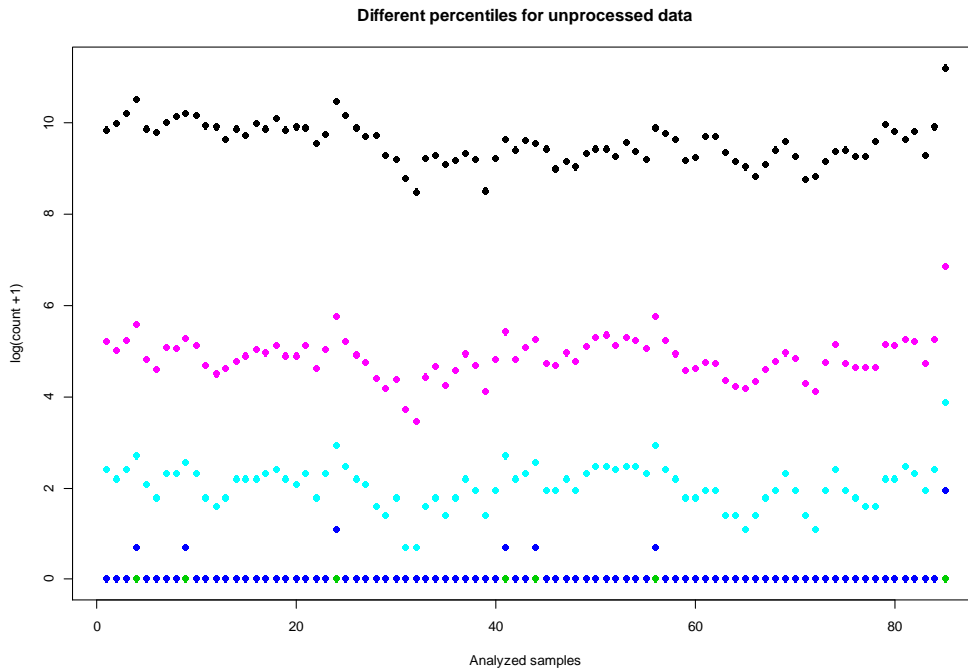

*Figure 1: Stability of the raw counts before normalizations. Data is processed with shifted log for visualization. The percentiles shown are 0,5,25,50,75,95, and 100. Four first percentiles are mostly on top of each other.*

Figure 1 shows that raw data has significant instabilities in percentiles. This is a well-known artefact of RNA-seq data. However, by using DeSeq style normalization<sup>1</sup>, shown in figure 2, we can improve data stability significantly. Third normalization step in our pipeline was ComBat normalization<sup>2</sup>. It altered the behavior of percentiles only little (See figure 3)

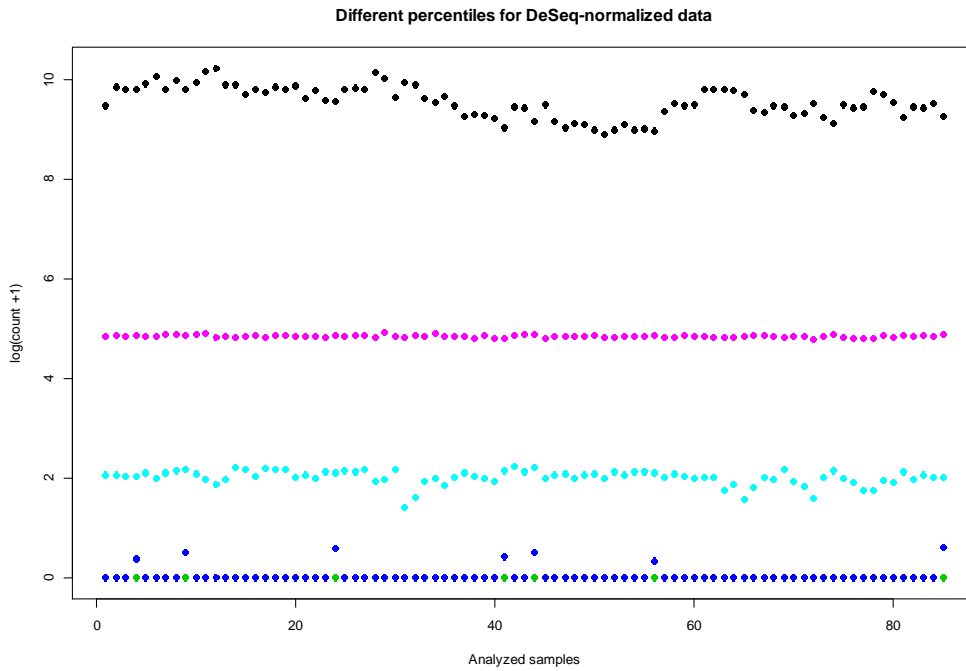

Figure 2: Stability of the data after DeSeq normalization. Notice the improved stability of the percentiles. See figure 1 for more information on visualization.

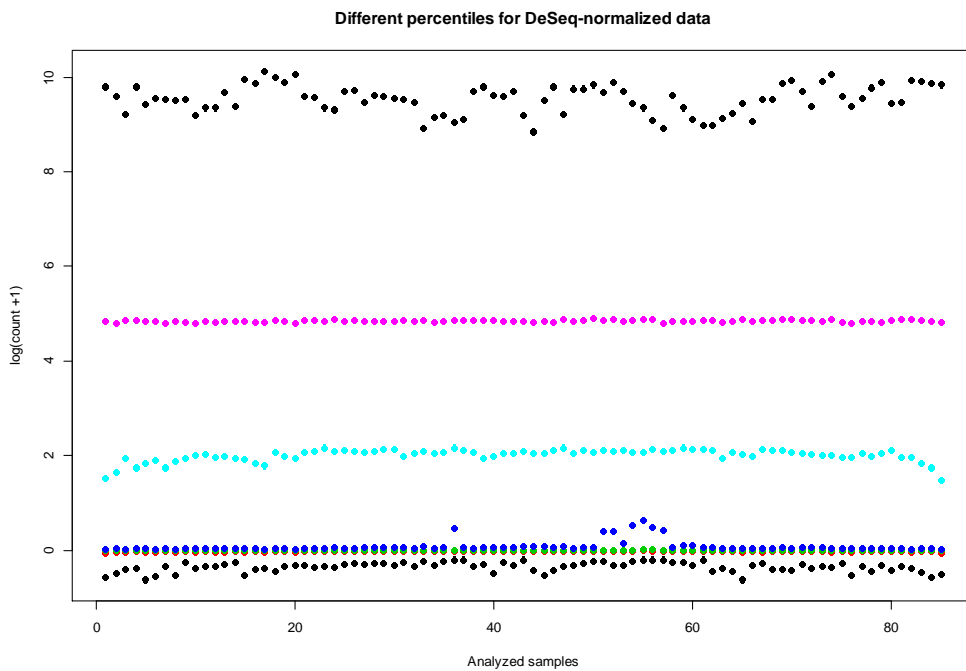

Figure 3: Stability of the data after ComBat normalization. Stability is similar to figure 2. See figure 1 for more information on the visualization.

Another important check on any biological dataset is the similarity of the biological replicates vs. similarity of different sample groups. Here the aim is to see if we can see separation between different sample groups. Another important issue is the check for the potential batch effects. We evaluate these by generating hierarchical clustering trees of samples. We used average methods with Pearson correlation. For

this visualization we show only DeSeq tree and ComBat tree

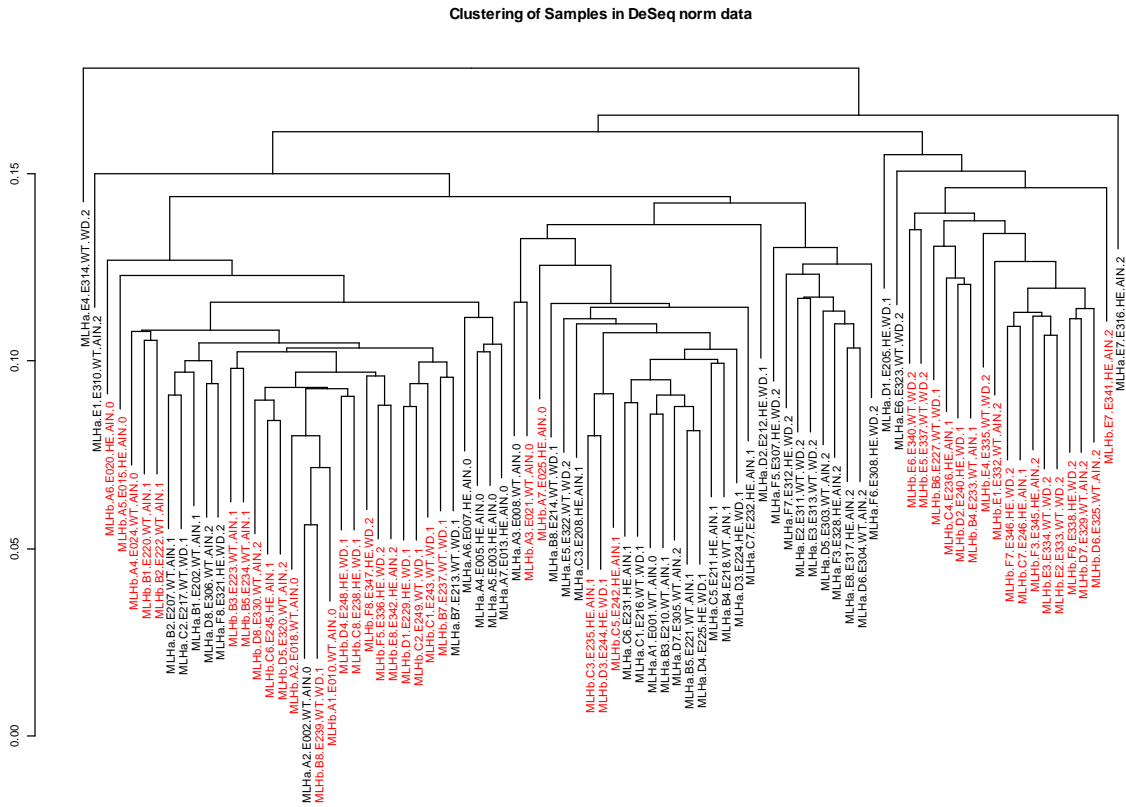

Figure 4: Clustering of samples after DeSeq normalization. Coloring highlights the clustering of two batches. Notice many large batch-related clusters.

Below we show another coloring where we look at the separation of biological sample groups. Samples had three variables: genotype, diet and measurement time point. Here the coloring shows time points, as they showed strongest correlation with RNAseq data.

Clustering of Samples in DeSeq norm data

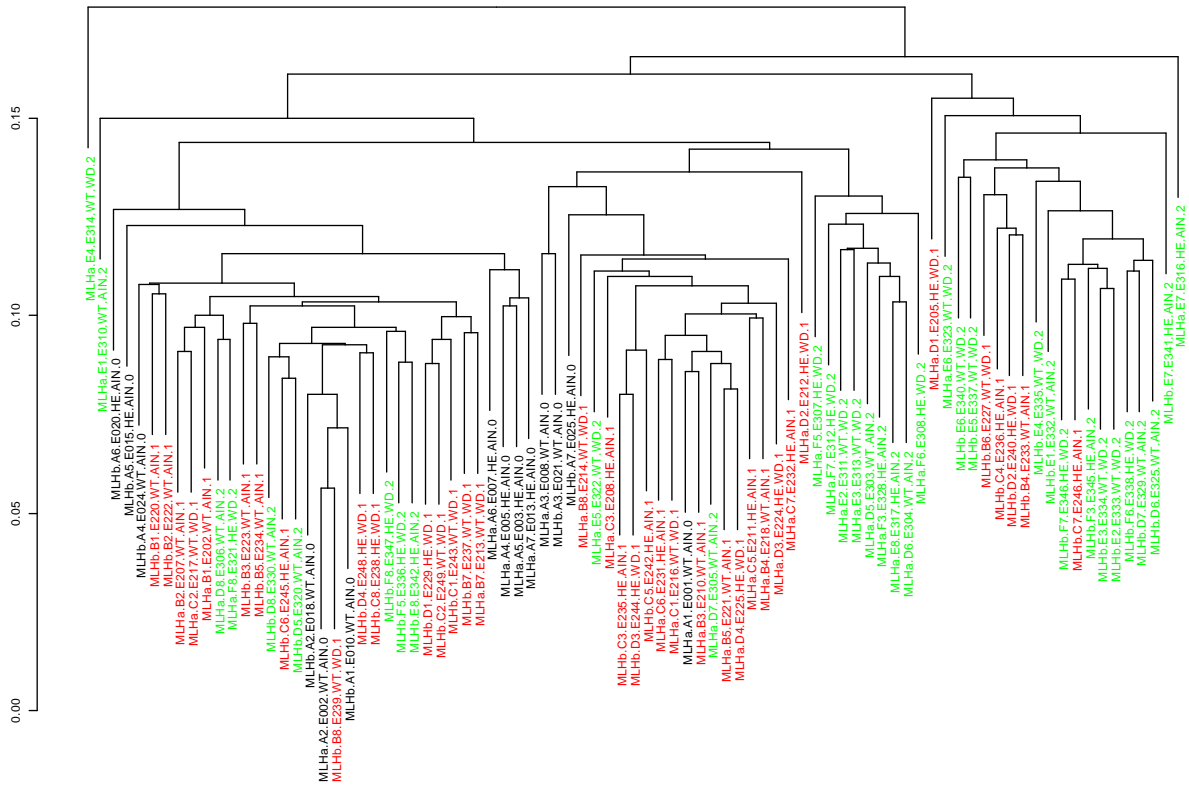

Figure 5: Clustering of DeSeq normalized data. Here the coloring highlights the three different time points. Cluster tree is same as in figure 4. Only label coloring is changed.

Notice that the clustering shows more correlation with the batches (figure 4) than with time points (figure 5). This encouraged us to use ComBat normalization<sup>2</sup>. The resulting clustering is shown in figure 6. Now the correlation of clusters with batches is totally removed. Also the correlation with time points is improved (see figure 7). Based on these visualizations we chose data with DESeq and ComBat normalizations to further analysis.

Clustering of Samples in ComBat norm data

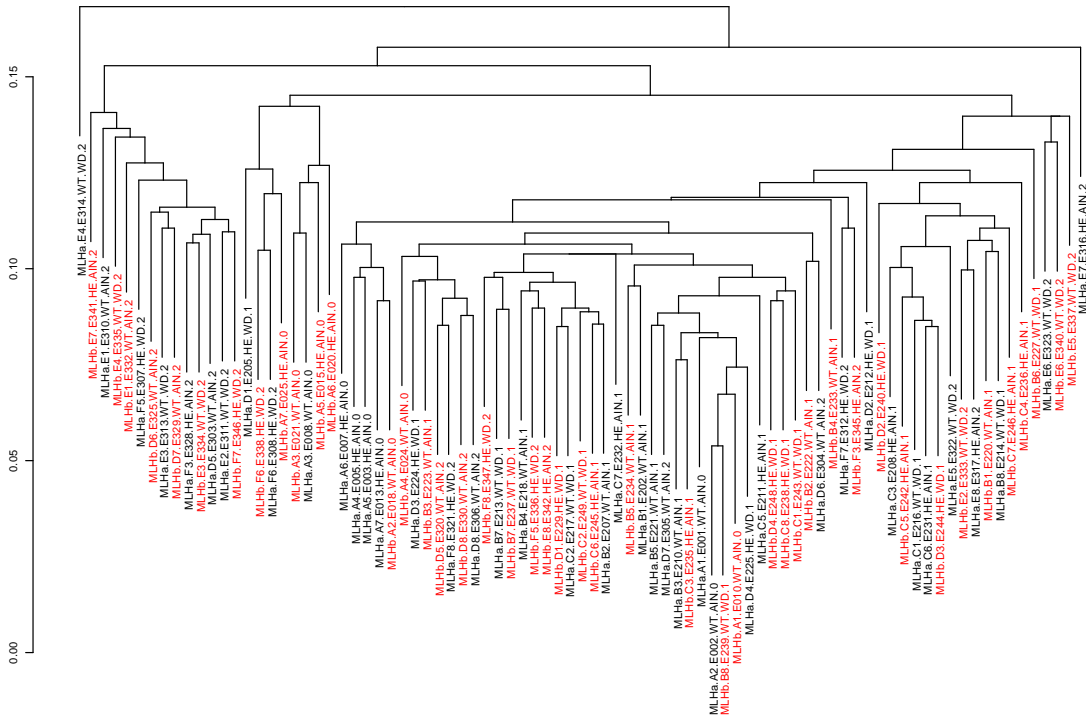

Figure 6: Sample clustering after ComBat normalization with different coloring for batches. Now the correlation of clusters with batches has disappeared.

Clustering of Samples in ComBat norm data

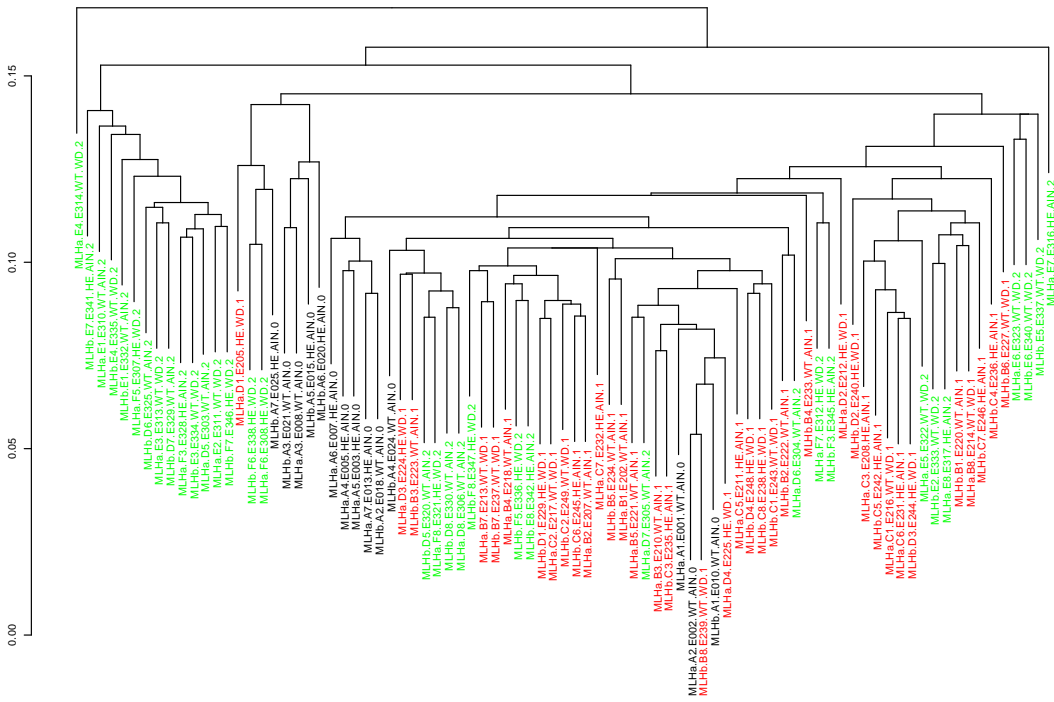



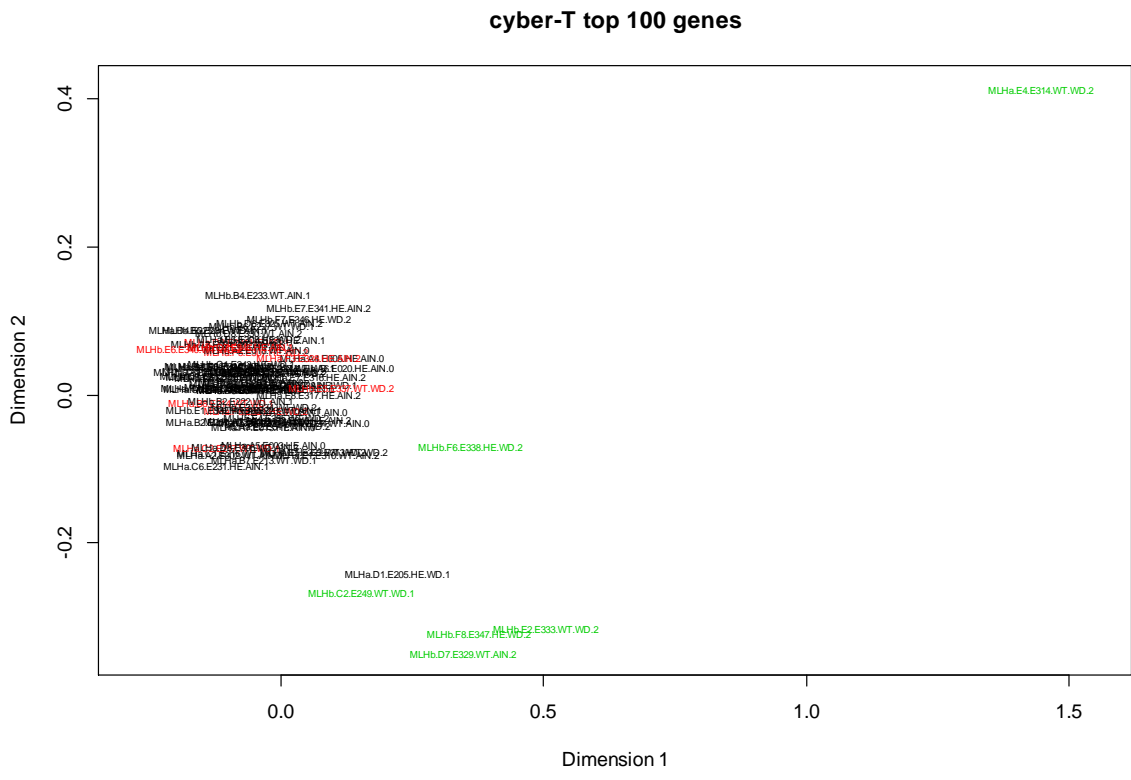

Figure 9: Separation of samples in the MDS plot with top-100 genes selected with cyber-T. Notice the better separation than with Limma, but still quite heterogenous distribution of carcinoma samples



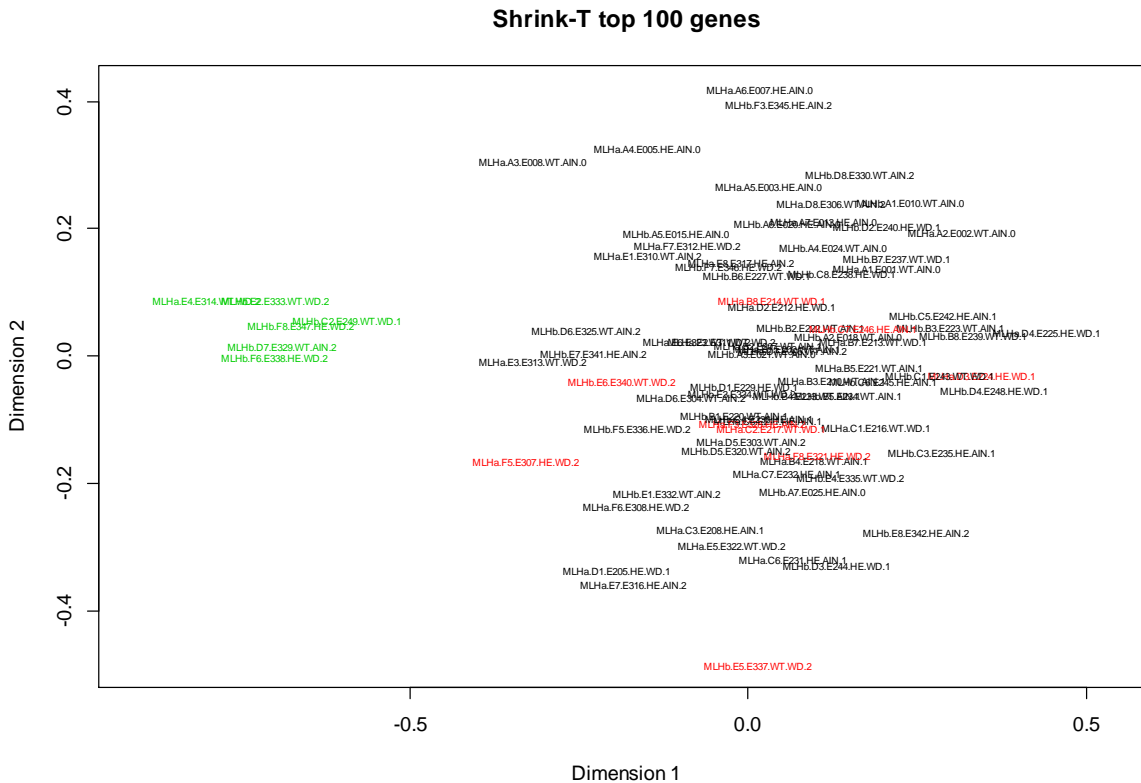

Figure 10: Separation of samples in MDS plot with top-100 genes selected shrinkage t-test (with unequal variance). Here carcinoma samples form a clear separate group.

Figures 8-10 show that shrinkage-t performs best at selecting genes that can separate carcinoma group. This result was obtained with unequal variance setting, where a separate variance estimate for gene is calculated for both groups. With equal variance setting the shrinkage-t performance did not separate from other methods (data not shown). This suggests that it is beneficial to use separate variance estimates in gene expression data, when comparing a small subset of samples to a larger pool of samples.

We furthermore confirmed these results by analyzing the RNA-seq data with in house created Gene Set Enrichment Analysis method (Gene Set Z-score, GSZ<sup>3</sup>). We ran the GSZ three times, using each of the compared DEA methods in turn as an input to GSZ analysis. Here the stronger signal would suggest stronger correlation between the RNAseq data and gene sets, obtained from Gene Ontology. We obtained stronger p-values with shrinkage-T for the top scoring GO classes (data not shown).

- 1 Anders, S. & Huber, W. Differential expression analysis for sequence count data. *Genome Biol* **11**, R106, doi:10.1186/gb-2010-11-10-r106 (2010).
- 2 Johnson, W. E., Li, C. & Rabinovic, A. Adjusting batch effects in microarray expression data using empirical Bayes methods. *Biostatistics* **8**, 118-127, doi:10.1093/biostatistics/kxj037 (2007).
- 3 Mishra, P., Toronen, P., Leino, Y. & Holm, L. Gene set analysis: limitations in popular existing methods and proposed improvements. *Bioinformatics* **30**, 2747-2756, doi:10.1093/bioinformatics/btu374 (2014).

Supplementary Table 3: The 300 most regulated genes between carcinoma and non-carcinoma mice

| Symbol    | MGI ID      | Name                                                                       | Shrink-T |
|-----------|-------------|----------------------------------------------------------------------------|----------|
| Orsl1     | MGI:1923813 | glutaminyl-tRNA synthase (glutamine-hydrolyzing)-like 1                    | -7.91    |
| Eftud1    | MGI:2141969 | elongation factor Tu GTP binding domain containing 1                       | -7.39    |
| Rad9a     | MGI:1328356 | RAD9 homolog A                                                             | -6.64    |
| Slc10a5   | MGI:2685251 | solute carrier family 10 (sodium/bile acid cotransporter family), member 5 | -6.49    |
| Gpr39     | MGI:1918361 | G protein-coupled receptor 39                                              | -6.34    |
| Vamp5     | MGI:1858622 | vesicle-associated membrane protein 5                                      | -6.27    |
| Tmem82    | MGI:2384869 | transmembrane protein 82                                                   | -6.23    |
| Tmem180   | MGI:1922396 | transmembrane protein 180                                                  | -6.20    |
| Preb      | MGI:1355326 | prolactin regulatory element binding                                       | -6.04    |
| Mtmr9     | MGI:2442842 | myotubularin related protein 9                                             | -6.03    |
| Ranbp3    | MGI:1919060 | RAN binding protein 3                                                      | -6.03    |
| Pard6a    | MGI:1927223 | par-6 family cell polarity regulator alpha                                 | -6.01    |
| D6Wsu163e | MGI:107893  | DNA segment, Chr 6, Wayne State University 163, expressed                  | -5.94    |
| Sphk2     | MGI:1861380 | sphingosine kinase 2                                                       | -5.80    |
| Ncapd3    | MGI:2142989 | non-SMC condensin II complex, subunit D3                                   | -5.73    |
| Sec16b    | MGI:2148802 | SEC16 homolog B ( <i>S. cerevisiae</i> )                                   | -5.64    |
| Triqk     | MGI:3650048 | triple QxxK/R motif containing                                             | -5.63    |
| Rbfa      | MGI:1915981 | ribosome binding factor A                                                  | -5.61    |
| Pgd       | MGI:97553   | phosphogluconate dehydrogenase                                             | -5.60    |
| Ms4a10    | MGI:1917076 | membrane-spanning 4-domains, subfamily A, member 10                        | -5.58    |
| Tle4      | MGI:104633  | transducin-like enhancer of split 4, homolog of <i>Drosophila</i> E(spl)   | 5.57     |
| Mfsd3     | MGI:1916822 | major facilitator superfamily domain containing 3                          | -5.53    |
| Tomm40    | MGI:1858259 | translocase of outer mitochondrial membrane 40 homolog (yeast)             | -5.52    |
| Zfp60     | MGI:99207   | zinc finger protein 60                                                     | -5.51    |
| Sf3a2     | MGI:104912  | splicing factor 3a, subunit 2                                              | -5.47    |
| Tcaf1     | MGI:1914665 | TRPM8 channel-associated factor 1                                          | -5.43    |
| Zcrb1     | MGI:1914447 | zinc finger CCHC-type and RNA binding motif 1                              | -5.36    |
| Car9      | MGI:2447188 | carbonic anhydrase 9                                                       | -5.28    |
| Ankrd27   | MGI:2444103 | ankyrin repeat domain 27 (VPS9 domain)                                     | -5.27    |
| Ktn1      | MGI:109153  | kinectin 1                                                                 | -5.26    |
| Tgds      | MGI:1923605 | TDP-glucose 4,6-dehydratase                                                | -5.17    |
| Vti1a     | MGI:1855699 | vesicle transport through interaction with t-SNAREs 1A                     | -5.15    |
| Kbtbd4    | MGI:1914386 | kelch repeat and BTB (POZ) domain containing 4                             | -5.09    |
| Tbrg4     | MGI:1100868 | transforming growth factor beta regulated gene 4                           | -5.07    |
| Zkscan5   | MGI:107533  | zinc finger with KRAB and SCAN domains 5                                   | -5.07    |
| Atl3      | MGI:1924270 | atlastin GTPase 3                                                          | -5.05    |
| Mis18a    | MGI:1913828 | MIS18 kinetochore protein homolog A ( <i>S. pombe</i> )                    | -5.03    |
| Rnf185    | MGI:1922078 | ring finger protein 185                                                    | -5.02    |
| Odf2      | MGI:1098824 | outer dense fiber of sperm tails 2                                         | -5.01    |
| Rilpl2    | MGI:1933112 | Rab interacting lysosomal protein-like 2                                   | -5.00    |
| Lman2     | MGI:1914140 | lectin, mannose-binding 2                                                  | -4.99    |
| Gle1      | MGI:1921662 | GLE1 RNA export mediator (yeast)                                           | -4.97    |
| Pnck      | MGI:1347357 | pregnancy upregulated non-ubiquitously expressed CaM kinase                | -4.94    |
| Gnb5      | MGI:101848  | guanine nucleotide binding protein (G protein), beta 5                     | -4.92    |
| Dlg3      | MGI:1888986 | discs, large homolog 3 ( <i>Drosophila</i> )                               | -4.91    |
| C4bp      | MGI:88229   | complement component 4 binding protein                                     | 4.91     |
| Rnf123    | MGI:2148796 | ring finger protein 123                                                    | -4.89    |
| Serp2     | MGI:1919911 | stress-associated endoplasmic reticulum protein family member 2            | 4.88     |
| Foxa3     | MGI:1347477 | forkhead box A3                                                            | -4.84    |
| Rpusd1    | MGI:1919186 | RNA pseudouridylate synthase domain containing 1                           | -4.81    |
| Gm5803    | MGI:3645633 | predicted gene 5803                                                        | -4.80    |
| Fbxl15    | MGI:1915681 | F-box and leucine-rich repeat protein 15                                   | -4.78    |
| Sfxn3     | MGI:2137679 | sideroflexin 3                                                             | -4.75    |
| Enthd2    | MGI:1926027 | ENTH domain containing 2                                                   | -4.74    |
| Smagp     | MGI:2448476 | small cell adhesion glycoprotein                                           | 4.74     |

|            |             |                                                                                                    |       |
|------------|-------------|----------------------------------------------------------------------------------------------------|-------|
| Mt2        | MGI:97172   | metallothionein 2                                                                                  | 4.72  |
| Slc44a2    | MGI:1915932 | solute carrier family 44, member 2                                                                 | -4.72 |
| Pla2g4a    | MGI:1195256 | phospholipase A2, group IVA (cytosolic, calcium-dependent)                                         | -4.71 |
| Bola3      | MGI:1925903 | bolA-like 3 (E. coli)                                                                              | -4.68 |
| lfrd1      | MGI:1316717 | interferon-related developmental regulator 1                                                       | -4.68 |
| Dclre1b    | MGI:2156057 | DNA cross-link repair 1B, PSO2 homolog (S. cerevisiae)                                             | -4.66 |
| C330007P06 | MGI:1924894 | RIKEN cDNA C330007P06 gene                                                                         | -4.65 |
| Mospd2     | MGI:1924013 | motile sperm domain containing 2                                                                   | -4.64 |
| Hspa13     | MGI:1309463 | heat shock protein 70 family, member 13                                                            | -4.63 |
| Atp6v0e2   | MGI:1923502 | ATPase, H <sup>+</sup> transporting, lysosomal V0 subunit E2                                       | 4.63  |
| Cstf2t     | MGI:1932622 | cleavage stimulation factor, 3' pre-RNA subunit 2, tau                                             | -4.61 |
| Ttll1      | MGI:2443047 | tubulin tyrosine ligase-like 1                                                                     | -4.60 |
| Casp12     | MGI:1312922 | caspase 12                                                                                         | -4.59 |
| Pms2       | MGI:104288  | postmeiotic segregation increased 2 (S. cerevisiae)                                                | -4.57 |
| Bcl2a1a    | MGI:102687  | B cell leukemia/lymphoma 2 related protein A1a                                                     | -4.56 |
| Trim25     | MGI:102749  | tripartite motif-containing 25                                                                     | -4.56 |
| Hist1h2bj  | MGI:2448388 | histone cluster 1, H2bj                                                                            | -4.55 |
| Rabgap1    | MGI:2385139 | RAB GTPase activating protein 1                                                                    | -4.52 |
| Fkbp8      | MGI:1341070 | FK506 binding protein 8                                                                            | -4.49 |
| Creb3l3    | MGI:2384786 | cAMP responsive element binding protein 3-like 3                                                   | 4.48  |
| Bub1       | MGI:1100510 | budding uninhibited by benzimidazoles 1 homolog (S. cerevisiae)                                    | -4.48 |
| Tpx2       | MGI:1919369 | TPX2, microtubule-associated protein homolog (Xenopus laevis)                                      | -4.47 |
| Ints10     | MGI:1918135 | integrator complex subunit 10                                                                      | -4.43 |
| Dph6       | MGI:1913882 | diphthamine biosynthesis 6                                                                         | -4.43 |
| Gdpd1      | MGI:1913819 | glycerophosphodiester phosphodiesterase domain containing 1                                        | 4.42  |
| 2010003K11 | MGI:1917111 | RIKEN cDNA 2010003K11 gene                                                                         | -4.40 |
| Cxcl16     | MGI:1932682 | chemokine (C-X-C motif) ligand 16                                                                  | -4.38 |
| Mrpl10     | MGI:1333801 | mitochondrial ribosomal protein L10                                                                | -4.38 |
| Slc25a12   | MGI:1926080 | solute carrier family 25 (mitochondrial carrier, Aralar), member 12                                | 4.38  |
| Urah       | MGI:1916142 | urate (5-hydroxyiso-) hydrolase                                                                    | 4.36  |
| Nfyc       | MGI:107901  | nuclear transcription factor-Y gamma                                                               | -4.32 |
| 1700037C18 | MGI:1920511 | RIKEN cDNA 1700037C18 gene                                                                         | -4.29 |
| Ddx23      | MGI:1921601 | DEAD (Asp-Glu-Ala-Asp) box polypeptide 23                                                          | -4.27 |
| Cenpe      | MGI:1098230 | centromere protein E                                                                               | -4.23 |
| P4ha2      | MGI:894286  | procollagen-proline, 2-oxoglutarate 4-dioxygenase (proline 4-hydroxylase),<br>alpha II polypeptide | 4.22  |
| Apol9b     | MGI:1919148 | apolipoprotein L 9b                                                                                | -4.21 |
| Ccar2      | MGI:2444228 | cell cycle activator and apoptosis regulator 2                                                     | -4.20 |
| Plscr3     | MGI:1917560 | phospholipid scramblase 3                                                                          | -4.20 |
| Slco2b1    | MGI:1351872 | solute carrier organic anion transporter family, member 2b1                                        | -4.16 |
| Kdm8       | MGI:1924285 | lysine (K)-specific demethylase 8                                                                  | -4.15 |
| Tmem164    | MGI:2148020 | transmembrane protein 164                                                                          | -4.12 |
| Efcab11    | MGI:1926017 | EF-hand calcium binding domain 11                                                                  | -4.12 |
| Wrap53     | MGI:2384933 | WD repeat containing, antisense to Trp53                                                           | -4.10 |
| Cenpn      | MGI:1919405 | centromere protein N                                                                               | -4.09 |
| Atf6b      | MGI:105121  | activating transcription factor 6 beta                                                             | -4.09 |
| Hspbbp1    | MGI:1913495 | HSPA (heat shock 70kDa) binding protein, cytoplasmic cochaperone 1                                 | -4.08 |
| Sfn2       | MGI:1313258 | schlafen 2                                                                                         | -4.08 |
| Cenpa      | MGI:88375   | centromere protein A                                                                               | -4.07 |
| 4931414P19 | MGI:1921609 | RIKEN cDNA 4931414P19 gene                                                                         | -4.06 |
| Arnt       | MGI:88071   | aryl hydrocarbon receptor nuclear translocator                                                     | -4.06 |
| Dolk       | MGI:2677836 | dolichol kinase                                                                                    | -4.06 |
| Tlr4       | MGI:96824   | toll-like receptor 4                                                                               | -4.04 |
| Dlst       | MGI:1926170 | dihydrolipoamide S-succinyltransferase (E2 component of 2-oxo-glutarate<br>complex)                | -4.04 |
| Vim        | MGI:98932   | vimentin                                                                                           | 4.04  |
| Uprt       | MGI:2685620 | uracil phosphoribosyltransferase (FUR1) homolog (S. cerevisiae)                                    | -4.03 |
| 2210016F16 | MGI:1917403 | RIKEN cDNA 2210016F16 gene                                                                         | -4.02 |
| Fahd2a     | MGI:1915376 | fumarylacetoacetate hydrolase domain containing 2A                                                 | -4.02 |

|            |             |                                                                              |       |
|------------|-------------|------------------------------------------------------------------------------|-------|
| Ccdc23     | MGI:1916466 | small vasohibin binding protein                                              | 4.01  |
| Pin4       | MGI:1916963 | protein (peptidyl-prolyl cis/trans isomerase) NIMA-interacting, 4 (parvulin) | 3.99  |
| Lxn        | MGI:107633  | latexin                                                                      | 3.99  |
| Arhgef3    | MGI:1918954 | Rho guanine nucleotide exchange factor (GEF) 3                               | -3.99 |
| Zfp748     | MGI:1916455 | zinc finger protein 748                                                      | -3.98 |
| Fubp1      | MGI:1196294 | far upstream element (FUSE) binding protein 1                                | -3.98 |
| Ptcd3      | MGI:1917206 | pentatricopeptide repeat domain 3                                            | -3.97 |
| Pstpip2    | MGI:1335088 | proline-serine-threonine phosphatase-interacting protein 2                   | -3.97 |
| Osgin1     | MGI:1919089 | oxidative stress induced growth inhibitor 1                                  | -3.96 |
| Zfp930     | MGI:2675306 | zinc finger protein 930                                                      | -3.96 |
| Psmg4      | MGI:1916916 | proteasome (prosome, macropain) assembly chaperone 4                         | 3.95  |
| Cped1      | MGI:2444814 | cadherin-like and PC-esterase domain containing 1                            | -3.94 |
| Rnase1     | MGI:97919   | ribonuclease, RNase A family, 1 (pancreatic)                                 | -3.93 |
| Cpsf6      | MGI:1913948 | cleavage and polyadenylation specific factor 6                               | -3.93 |
| Kif4       | MGI:108389  | kinesin family member 4                                                      | -3.92 |
| Traip      | MGI:1096377 | TRAF-interacting protein                                                     | -3.92 |
| Exoc2      | MGI:1913732 | exocyst complex component 2                                                  | -3.92 |
| Hist1h4b   | MGI:2448420 | histone cluster 1, H4b                                                       | -3.92 |
| Fancc      | MGI:95480   | Fanconi anemia, complementation group C                                      | -3.91 |
| 2310007B03 | MGI:1919124 | RIKEN cDNA 2310007B03 gene                                                   | -3.90 |
| Bud13      | MGI:2443443 | BUD13 homolog (yeast)                                                        | -3.90 |
| Wdr12      | MGI:1927241 | WD repeat domain 12                                                          | -3.90 |
| Fadd       | MGI:109324  | Fas (TNFRSF6)-associated via death domain                                    | -3.90 |
| Stk4       | MGI:1929004 | serine/threonine kinase 4                                                    | -3.89 |
| Lurap1l    | MGI:106510  | leucine rich adaptor protein 1-like                                          | 3.88  |
| Cln8       | MGI:1349447 | ceroid-lipofuscinosis, neuronal 8                                            | 3.87  |
| Btrc       | MGI:1338871 | beta-transducin repeat containing protein                                    | -3.87 |
| Vps13c     | MGI:2444207 | vacuolar protein sorting 13C (yeast)                                         | -3.87 |
| Tra2b      | MGI:106016  | transformer 2 beta homolog (Drosophila)                                      | 3.86  |
| AA986860   | MGI:2138143 | expressed sequence AA986860                                                  | 3.86  |
| Pak1       | MGI:1339975 | p21 protein (Cdc42/Rac)-activated kinase 1                                   | -3.85 |
| Letmd1     | MGI:1915864 | LETM1 domain containing 1                                                    | -3.85 |
| Pus1       | MGI:3047787 | pseudouridylate synthase-like 1                                              | -3.85 |
| Fbxo38     | MGI:2444639 | F-box protein 38                                                             | -3.85 |
| Rad54l     | MGI:894697  | RAD54 like (S. cerevisiae)                                                   | -3.84 |
| Coq10b     | MGI:1915126 | coenzyme Q10 homolog B (S. cerevisiae)                                       | -3.84 |
| Nme3       | MGI:1930182 | NME/NM23 nucleoside diphosphate kinase 3                                     | 3.83  |
| Ppp1r2     | MGI:1914099 | protein phosphatase 1, regulatory (inhibitor) subunit 2                      | -3.83 |
| lkbkg      | MGI:1338074 | inhibitor of kappaB kinase gamma                                             | -3.83 |
| Trmt1l     | MGI:1916185 | tRNA methyltransferase 1 like                                                | -3.83 |
| Ddrk1      | MGI:1924256 | DDRK domain containing 1                                                     | 3.83  |
| Zc3h12a    | MGI:2385891 | zinc finger CCCH type containing 12A                                         | -3.82 |
| Zfp65      | MGI:107769  | zinc finger protein 65                                                       | -3.82 |
| Zfp808     | MGI:3704127 | zinc finger protein 80                                                       | -3.82 |
| Nat8       | MGI:1915646 | N-acetyltransferase 8 (GCN5-related)                                         | -3.81 |
| Slc9a3r2   | MGI:1890662 | solute carrier family 9 (sodium/hydrogen exchanger), member 3 regulator 2    | -3.81 |
| Pls3       | MGI:104807  | plastin 3 (T-isoform)                                                        | -3.80 |
| Hist1h2an  | MGI:2448300 | histone cluster 1, H2an                                                      | -3.79 |
| Ank3       | MGI:88026   | ankyrin 3, epithelial                                                        | -3.75 |
| Cd36       | MGI:107899  | CD36 antigen                                                                 | -3.74 |
| Golph3l    | MGI:1917129 | golgi phosphoprotein 3-like                                                  | -3.74 |
| Slc39a7    | MGI:95909   | solute carrier family 39 (zinc transporter), member 7                        | -3.74 |
| Stk19      | MGI:1860085 | serine/threonine kinase 19                                                   | -3.74 |
| Gcdh       | MGI:104541  | glutaryl-Coenzyme A dehydrogenase                                            | -3.74 |
| Tmx3       | MGI:2442418 | thioredoxin-related transmembrane protein 3                                  | -3.73 |
| Apol10a    | MGI:3036238 | apolipoprotein L 10A                                                         | -3.71 |
| Mmgt1      | MGI:2384305 | membrane magnesium transporter 1                                             | -3.71 |

|            |             |                                                                                     |       |
|------------|-------------|-------------------------------------------------------------------------------------|-------|
| Ptbp2      | MGI:1860489 | polypyrimidine tract binding protein 2                                              | -3.71 |
| Tuba1b     | MGI:107804  | tubulin, alpha 1B                                                                   | -3.70 |
| Egfl7      | MGI:2449923 | EGF-like domain 7                                                                   | -3.70 |
| Zfp956     | MGI:2141515 | zinc finger protein 956                                                             | -3.69 |
| Ccnf       | MGI:102551  | cyclin F                                                                            | -3.69 |
| 9030617003 | MGI:2444813 | RIKEN cDNA 9030617003 gene                                                          | -3.68 |
| Slc39a1    | MGI:1353474 | solute carrier family 39 (zinc transporter), member 1                               | -3.68 |
| Myd88      | MGI:108005  | myeloid differentiation primary response gene 88                                    | -3.67 |
| Ace2       | MGI:1917258 | angiotensin I converting enzyme (peptidyl-dipeptidase A) 2                          | -3.67 |
| Kif22      | MGI:109233  | kinesin family member 22                                                            | -3.66 |
| Trmt2a     | MGI:96270   | TRM2 tRNA methyltransferase 2A                                                      | -3.65 |
| Gnb1       | MGI:95781   | guanine nucleotide binding protein (G protein), beta 1                              | -3.65 |
| Dnajb1     | MGI:1931874 | DnaJ (Hsp40) homolog, subfamily B, member 1                                         | -3.65 |
| Creld1     | MGI:2152539 | cysteine-rich with EGF-like domains 1                                               | -3.64 |
| Gba2       | MGI:2654325 | glucosidase beta 2                                                                  | -3.64 |
| Pot1a      | MGI:2141503 | protection of telomeres 1A                                                          | -3.64 |
| Sf3a1      | MGI:1914715 | splicing factor 3a, subunit 1                                                       | -3.63 |
| Tmx2       | MGI:1914208 | thioredoxin-related transmembrane protein 2                                         | -3.63 |
| Gskip      | MGI:1914037 | GSK3B interacting protein                                                           | 3.61  |
| Tnip3      | MGI:3041165 | TNFAIP3 interacting protein 3                                                       | -3.61 |
| Cnot4      | MGI:1859026 | CCR4-NOT transcription complex, subunit 4                                           | 3.60  |
| Uap111     | MGI:2443318 | UDP-N-acetylglucosamine pyrophosphorylase 1-like 1                                  | -3.60 |
| Ezh1       | MGI:1097695 | enhancer of zeste 1 polycomb repressive complex 2 subunit                           | -3.59 |
| Mettl8     | MGI:2385142 | methyltransferase like 8                                                            | -3.59 |
| Mbtps1     | MGI:1927235 | membrane-bound transcription factor peptidase, site 1                               | -3.58 |
| Cep95      | MGI:2443502 | centrosomal protein 95                                                              | -3.57 |
| Smg9       | MGI:1919247 | smg-9 homolog, nonsense mediated mRNA decay factor (C. elegans)                     | -3.57 |
| Aurkaip1   | MGI:1913327 | aurora kinase A interacting protein 1                                               | 3.56  |
| Ttf2       | MGI:1921294 | transcription termination factor, RNA polymerase II                                 | -3.56 |
| Adck4      | MGI:1924139 | aarF domain containing kinase 4                                                     | -3.55 |
| Hdgfrp2    | MGI:1194492 | hepatoma-derived growth factor, related protein 2                                   | -3.55 |
| Csde1      | MGI:92356   | cold shock domain containing E1, RNA binding                                        | -3.53 |
| Clns1a     | MGI:109638  | chloride channel, nucleotide-sensitive, 1A                                          | -3.53 |
| Dpf3       | MGI:1917377 | D4, zinc and double PHD fingers, family 3                                           | -3.52 |
| H1f0       | MGI:95893   | H1 histone family, member 0                                                         | -3.52 |
| Haus5      | MGI:1919159 | HAUS augmin-like complex, subunit 5                                                 | -3.52 |
| Pitx2      | MGI:109340  | paired-like homeodomain transcription factor 2                                      | -3.51 |
| Wfdc1      | MGI:1915116 | WAP four-disulfide core domain 1                                                    | -3.51 |
| Ubac1      | MGI:1920995 | ubiquitin associated domain containing 1                                            | -3.51 |
| Abcf1      | MGI:1351658 | ATP-binding cassette, sub-family F (GCN20), member 1                                | 3.51  |
| Sec24c     | MGI:1919746 | Sec24 related gene family, member C (S. cerevisiae)                                 | -3.50 |
| Galnt7     | MGI:1349449 | UDP-N-acetyl-alpha-D-galactosamine: polypeptide N-acetylgalactosaminyltransferase 7 | -3.50 |
| Shc1       | MGI:98296   | src homology 2 domain-containing transforming protein C1                            | -3.49 |
| P4hb       | MGI:97464   | prolyl 4-hydroxylase, beta polypeptide                                              | -3.49 |
| Skiv2l     | MGI:1099835 | superkiller viralicidic activity 2-like (S. cerevisiae)                             | -3.49 |
| Mlh1       | MGI:101938  | mutL homolog 1 (E. coli)                                                            | -3.49 |
| Gmpr2      | MGI:1917903 | guanosine monophosphate reductase 2                                                 | -3.48 |
| Zfp329     | MGI:1921283 | zinc finger protein 329                                                             | -3.48 |
| Abi3bp     | MGI:2444583 | ABI gene family, member 3 (NESH) binding protein                                    | -3.47 |
| Pax4       | MGI:97488   | paired box 4                                                                        | -3.47 |
| Gnpat      | MGI:1343460 | glyceronephosphate O-acyltransferase                                                | -3.47 |
| Spdl1      | MGI:1917635 | spindle apparatus coiled-coil protein 1                                             | -3.46 |
| Eps8l3     | MGI:2139743 | EPS8-like 3                                                                         | -3.45 |
| Clcn3      | MGI:103555  | chloride channel, voltage-sensitive 3                                               | -3.45 |
| Cdk5rap1   | MGI:1914221 | CDK5 regulatory subunit associated protein 1                                        | 3.45  |
| Itgae      | MGI:1298377 | integrin alpha E, epithelial-associated                                             | -3.44 |
| Rnf121     | MGI:1922462 | ring finger protein 121                                                             | -3.44 |
| Twf2       | MGI:1346078 | twinfilin, actin-binding protein, homolog 2 (Drosophila)                            | -3.43 |

|          |             |                                                          |       |
|----------|-------------|----------------------------------------------------------|-------|
| Polr3a   | MGI:2681836 | polymerase (RNA) III (DNA directed) polypeptide A        | -3.43 |
| Tmem176a | MGI:1913308 | transmembrane protein 176A                               | -3.42 |
| Ccnb2    | MGI:88311   | cyclin B2                                                | -3.42 |
| Mt1      | MGI:97171   | metallothionein 1                                        | 3.42  |
| Pole     | MGI:1196391 | polymerase (DNA directed), epsilon                       | -3.40 |
| Bckdk    | MGI:1276121 | branched chain ketoacid dehydrogenase kinase             | -3.40 |
| Clps     | MGI:88421   | colipase, pancreatic                                     | 3.40  |
| Tsr1     | MGI:1915061 | MGI:: TSR1 20S rRNA accumulation                         | -3.40 |
| Gpalpp1  | MGI:1914717 | GPALPP motifs containing 1                               | -3.39 |
| Stoml2   | MGI:1913842 | stomatin (Epb7.2)-like 2                                 | 3.39  |
| Irgm1    | MGI:107567  | immunity-related GTPase family M member 1                | -3.39 |
| Acox3    | MGI:1933156 | acyl-Coenzyme A oxidase 3, pristanoyl                    | -3.39 |
| Rph3al   | MGI:1923492 | rabphilin 3A-like (without C2 domains)                   | -3.39 |
| Fam111a  | MGI:1915508 | family with sequence similarity 111, member A            | -3.38 |
| Cit      | MGI:105313  | citron                                                   | -3.37 |
| Slc5a8   | MGI:2384916 | solute carrier family 5 (iodide transporter), member 8   | -3.37 |
| Cacnb3   | MGI:103307  | calcium channel, voltage-dependent, beta 3 subunit       | -3.36 |
| Cox4i2   | MGI:2135755 | cytochrome c oxidase subunit IV isoform 2                | 3.36  |
| Dctn2    | MGI:107733  | dynactin 2                                               | 3.36  |
| Mfap2    | MGI:99559   | microfibrillar-associated protein 2                      | -3.35 |
| Cc2d2a   | MGI:1924487 | coiled-coil and C2 domain containing 2A                  | -3.35 |
| Igf2bp2  | MGI:1890358 | insulin-like growth factor 2 mRNA binding protein 2      | -3.35 |
| Ophn1    | MGI:2151070 | oligophrenin 1                                           | -3.35 |
| Rcn3     | MGI:1277122 | reticulocalbin 3, EF-hand calcium binding domain         | -3.35 |
| Ppan     | MGI:2178445 | peter pan homolog (Drosophila)                           | -3.34 |
| Rcl1     | MGI:1913275 | RNA terminal phosphate cyclase-like 1                    | -3.34 |
| Tssc1    | MGI:1289332 | tumor suppressing subtransferable candidate 1            | -3.33 |
| Nnmt     | MGI:1099443 | nicotinamide N-methyltransferase                         | -3.33 |
| Slc25a40 | MGI:2442486 | solute carrier family 25, member 40                      | -3.32 |
| Srsf10   | MGI:1333805 | serine/arginine-rich splicing factor 10                  | -3.32 |
| Jup      | MGI:96650   | junction plakoglobin                                     | -3.32 |
| Tipin    | MGI:1921571 | timeless interacting protein                             | -3.32 |
| Phgr1    | MGI:1858382 | proline/histidine/glycine-rich 1                         | 3.32  |
| Pcp4     | MGI:97509   | Purkinje cell protein 4                                  | 3.32  |
| Tbl3     | MGI:2384863 | transducin (beta)-like 3                                 | -3.31 |
| Fancg    | MGI:1926471 | Fanconi anemia, complementation group G                  | -3.30 |
| Laptm5   | MGI:108046  | lysosomal-associated protein transmembrane 5             | -3.30 |
| Kpna2    | MGI:103561  | karyopherin (importin) alpha 2                           | -3.30 |
| Phlda2   | MGI:1202307 | pleckstrin homology-like domain, family A, member 2      | -3.29 |
| Wdr46    | MGI:1931871 | WD repeat domain 46                                      | -3.29 |
| Rsrp1    | MGI:106498  | arginine/serine rich protein 1                           | 3.29  |
| Irf2     | MGI:96591   | interferon regulatory factor 2                           | 3.29  |
| Zfp426   | MGI:1920248 | zinc finger protein 426                                  | -3.29 |
| Cdh1     | MGI:88354   | cadherin 1                                               | -3.28 |
| Leng1    | MGI:1917007 | leukocyte receptor cluster (LRC) member 1                | -3.27 |
| Htr2b    | MGI:109323  | 5-hydroxytryptamine (serotonin) receptor 2B              | -3.27 |
| Rhbdd1   | MGI:1924117 | rhomboid domain containing 1                             | -3.26 |
| Tbx3     | MGI:98495   | T-box 3                                                  | -3.26 |
| Arhgap6  | MGI:1196332 | Rho GTPase activating protein 6                          | -3.26 |
| Chd4     | MGI:1344380 | chromodomain helicase DNA binding protein 4              | -3.25 |
| Gm20594  | MGI:5295700 | predicted gene, 20594                                    | 3.24  |
| Fcrls    | MGI:1933397 | Fc receptor-like 5, scavenger receptor                   | -3.23 |
| Slc35b3  | MGI:1913978 | solute carrier family 35, member B3                      | -3.23 |
| Pigh     | MGI:99463   | phosphatidylinositol glycan anchor biosynthesis, class H | -3.23 |
| Tor1aip1 | MGI:3582693 | torsin A interacting protein 1                           | -3.22 |
| Grp      | MGI:95833   | gastrin releasing peptide                                | -3.22 |
| Mia2     | MGI:2159614 | melanoma inhibitory activity 2                           | -3.22 |
| Usb1     | MGI:2142454 | U6 snRNA biogenesis 1                                    | -3.21 |
| Cyb5r3   | MGI:94893   | cytochrome b5 reductase 3                                | -3.21 |

|          |             |                                                                    |       |
|----------|-------------|--------------------------------------------------------------------|-------|
| Arhgef38 | MGI:1924919 | Rho guanine nucleotide exchange factor (GEF) 38                    | -3.21 |
| Dhps     | MGI:2683592 | deoxyhypusine synthase                                             | -3.21 |
| Mt3      | MGI:97173   | metallothionein 3                                                  | 3.21  |
| Atxn10   | MGI:1859293 | ataxin 10                                                          | 3.21  |
| Dimt1    | MGI:1913504 | DIM1 dimethyladenosine transferase 1-like ( <i>S. cerevisiae</i> ) | -3.21 |
| Fcer1g   | MGI:95496   | Fc receptor, IgE, high affinity I, gamma polypeptide               | 3.19  |
| Fam49a   | MGI:1261783 | family with sequence similarity 49, member A                       | -3.18 |
| Hells    | MGI:106209  | helicase, lymphoid specific                                        | -3.18 |
| Snrpb2   | MGI:104805  | U2 small nuclear ribonucleoprotein B                               | 3.18  |
| Kdm5c    | MGI:99781   | lysine (K)-specific demethylase 5C                                 | -3.18 |
| Mzb1     | MGI:1917066 | marginal zone B and B1 cell-specific protein 1                     | 3.17  |
| Oma1     | MGI:1914263 | OMA1 homolog, zinc metallopeptidase ( <i>S. cerevisiae</i> )       | -3.17 |
| Slc9a8   | MGI:1924281 | solute carrier family 9 (sodium/hydrogen exchanger), member 8      | -3.17 |
| Abcc3    | MGI:1923658 | ATP-binding cassette, sub-family C (CFTR/MRP), member 3            | -3.16 |

**Supplementary Table 4. Pathway analysis**

**Carcinoma mice vs. non-carcinoma mice**

| <b>Categories</b>                                                                                                         | <b>Diseases or Functions Annotation</b>         | <b>p-Value</b> | <b># Molecules</b> |
|---------------------------------------------------------------------------------------------------------------------------|-------------------------------------------------|----------------|--------------------|
| Cancer, Organismal Injury and Abnormalities, Renal and Urological Disease                                                 | tumorigenesis of urinary tract tumor            | 2,33E-05       | 3                  |
| Inflammatory Response                                                                                                     | innate immune response                          | 5,94E-05       | 12                 |
| Cell Death and Survival                                                                                                   | cell death of connective tissue cells           | 7,30E-05       | 25                 |
| Cell Cycle, Cellular Assembly and Organization, DNA Replication, Recombination, and Repair                                | segregation of chromosomes                      | 9,24E-05       | 9                  |
| Cell Cycle, DNA Replication, Recombination, and Repair                                                                    | checkpoint control                              | 1,10E-04       | 8                  |
| Cell Death and Survival, Cellular Function and Maintenance                                                                | colony survival of pancreatic cancer cell lines | 1,79E-04       | 2                  |
| Cell Death and Survival, Cellular Compromise, Hepatic System Development and Function                                     | cytotoxicity of hepatocytes                     | 1,79E-04       | 2                  |
| Cancer, Endocrine System Disorders, Gastrointestinal Disease, Organismal Injury and Abnormalities                         | early-onset pancreatic cancer                   | 1,79E-04       | 2                  |
| Cell Death and Survival, Cellular Assembly and Organization, Cellular Compromise                                          | formation of lead inclusion bodies              | 1,79E-04       | 2                  |
| Cell Death and Survival                                                                                                   | killing of skin cell lines                      | 1,79E-04       | 2                  |
| Molecular Transport, Small Molecule Biochemistry                                                                          | release of Zn <sup>2+</sup>                     | 1,79E-04       | 2                  |
| Organismal Injury and Abnormalities, Renal and Urological Disease                                                         | severity of renal lesion                        | 1,79E-04       | 2                  |
| Cell Cycle, DNA Replication, Recombination, and Repair                                                                    | DNA replication checkpoint                      | 1,88E-04       | 3                  |
| Cellular Function and Maintenance, Hematological System Development and Function, Nervous System Development and Function | function of microglia                           | 1,90E-04       | 4                  |
| Cell Death and Survival                                                                                                   | necrosis                                        | 2,58E-04       | 74                 |
| Cell Death and Survival                                                                                                   | cell death of renal tubule                      | 2,75E-04       | 6                  |
| Cell Death and Survival                                                                                                   | apoptosis of tumor cell lines                   | 3,19E-04       | 40                 |
| Cell Morphology, Nervous System Development and Function                                                                  | morphology of astrocytes                        | 3,63E-04       | 5                  |
| RNA Post-Transcriptional Modification                                                                                     | processing of RNA                               | 3,90E-04       | 14                 |
| Cell Death and Survival                                                                                                   | cell death of fibroblast cell lines             | 4,08E-04       | 18                 |
| Cell-To-Cell Signaling and Interaction                                                                                    | response of macrophage cancer cell lines        | 4,33E-04       | 4                  |
| Cell Death and Survival                                                                                                   | apoptosis of connective tissue cells            | 4,60E-04       | 14                 |
| Cell Death and Survival, Gastrointestinal Disease, Hepatic System Disease, Organismal Injury and Abnormalities            | necrosis of liver                               | 4,74E-04       | 12                 |
| Cell-To-Cell Signaling and Interaction, Inflammatory Response                                                             | innate immune response of tumor cell lines      | 4,78E-04       | 3                  |
| Cell Morphology, Hematological System Development and Function, Nervous System Development and Function                   | morphology of microglia                         | 5,00E-04       | 4                  |
| Cell Cycle, Connective Tissue Development and Function                                                                    | aneuploidy of fibroblasts                       | 5,31E-04       | 2                  |
| Cancer, Organismal Injury and Abnormalities, Renal and Urological Disease                                                 | formation of renal-cell carcinoma               | 5,31E-04       | 2                  |
| Amino Acid Metabolism, Post-Translational Modification, Small Molecule Biochemistry                                       | hydroxylation of L-proline                      | 5,31E-04       | 2                  |
| Cell Death and Survival                                                                                                   | killing of epithelial cell lines                | 5,31E-04       | 2                  |
| Organismal Injury and Abnormalities, Renal and Urological Disease                                                         | nephromegaly                                    | 5,31E-04       | 2                  |
| Cancer, Hematological Disease, Immunological Disease, Organismal Injury and Abnormalities                                 | small B-cell lymphocytic lymphoma               | 5,74E-04       | 4                  |
| Cellular Function and Maintenance, Molecular Transport, Small Molecule Biochemistry                                       | homeostasis of Zn <sup>2+</sup>                 | 6,15E-04       | 3                  |
| Cell Death and Survival                                                                                                   | apoptosis of renal tubule                       | 6,45E-04       | 5                  |



|                                                                                                                           |                                                               |          |     |
|---------------------------------------------------------------------------------------------------------------------------|---------------------------------------------------------------|----------|-----|
| Cancer, Organismal Injury and Abnormalities                                                                               | cancer                                                        | 6,51E-04 | 244 |
| Cellular Assembly and Organization                                                                                        | missegregation of chromosomes                                 | 6,55E-04 | 4   |
| Infectious Diseases                                                                                                       | protozoan infection                                           | 8,16E-04 | 6   |
| Cell Death and Survival                                                                                                   | apoptosis of fibroblasts                                      | 8,54E-04 | 11  |
| Cell Death and Survival                                                                                                   | apoptosis of epithelial cells                                 | 8,83E-04 | 13  |
| Cell Death and Survival                                                                                                   | cell death                                                    | 9,43E-04 | 88  |
| Cell Death and Survival, Cellular Function and Maintenance                                                                | colony survival of tumor cell lines                           | 9,48E-04 | 4   |
| Cell Death and Survival                                                                                                   | apoptosis of cervical cancer cell lines                       | 9,55E-04 | 13  |
| Cell Death and Survival                                                                                                   | cell death of tumor cell lines                                | 9,84E-04 | 46  |
| Cancer, Gastrointestinal Disease, Hereditary Disorder, Organismal Injury and Abnormalities                                | Turcot syndrome type 1                                        | 1,05E-03 | 2   |
| Neurological Disease                                                                                                      | Wallerian degeneration of sciatic nerve                       | 1,05E-03 | 2   |
| Gastrointestinal Disease                                                                                                  | abnormal absorption of mineral in intestine                   | 1,05E-03 | 2   |
| Cell-To-Cell Signaling and Interaction                                                                                    | aggregation of bone cancer cell lines                         | 1,05E-03 | 2   |
| Cell-To-Cell Signaling and Interaction                                                                                    | aggregation of sarcoma cell lines                             | 1,05E-03 | 2   |
| Cellular Assembly and Organization                                                                                        | binding of chromosomes                                        | 1,05E-03 | 2   |
| Cell Death and Survival, Cellular Function and Maintenance                                                                | clearance of nontypeable Haemophilus influenzae strain 12     | 1,05E-03 | 2   |
| Organismal Survival                                                                                                       | death by human herpesvirus 2                                  | 1,05E-03 | 2   |
| Cancer, Gastrointestinal Disease, Hereditary Disorder, Organismal Injury and Abnormalities                                | hereditary nonpolyposis colorectal cancer type 1              | 1,05E-03 | 2   |
| Neurological Disease                                                                                                      | neuropathy of brain                                           | 1,05E-03 | 2   |
| Tissue Morphology                                                                                                         | quantity of Francisella tularensis                            | 1,05E-03 | 2   |
| Tissue Morphology                                                                                                         | quantity of Salmonella enterica serovar Typhimurium C5 strain | 1,05E-03 | 2   |
| Cellular Development, Cellular Growth and Proliferation, Embryonic Development, Organismal Development, Tissue Morphology | quantity of mesodermal cells                                  | 1,05E-03 | 2   |
| Cell Morphology, Nervous System Development and Function                                                                  | abnormal morphology of astrocytes                             | 1,06E-03 | 4   |
| Lipid Metabolism, Small Molecule Biochemistry                                                                             | synthesis of prostaglandin D2                                 | 1,06E-03 | 4   |
| Cell Cycle                                                                                                                | arrest in mitosis of cervical cancer cell lines               | 1,07E-03 | 5   |
| Cell Death and Survival                                                                                                   | cell death of cervical cancer cell lines                      | 1,08E-03 | 15  |
| Cell-To-Cell Signaling and Interaction                                                                                    | clustering of cells                                           | 1,19E-03 | 4   |
| Cell Death and Survival, Organismal Injury and Abnormalities, Renal and Urological Disease                                | necrosis of renal tubule                                      | 1,24E-03 | 5   |
| Cell Death and Survival, Organismal Injury and Abnormalities, Renal and Urological Disease                                | necrosis of kidney                                            | 1,32E-03 | 15  |
| Cell Morphology                                                                                                           | polarization of Th17 cells                                    | 1,40E-03 | 3   |
| Cellular Assembly and Organization, DNA Replication, Recombination, and Repair                                            | quantity of mitotic spindle                                   | 1,40E-03 | 3   |
| Cell Death and Survival                                                                                                   | cell death of fibroblasts                                     | 1,41E-03 | 12  |
| Cell Signaling                                                                                                            | I-kappaB kinase/NF-kappaB cascade                             | 1,44E-03 | 9   |
| Cell Cycle                                                                                                                | arrest in mitosis                                             | 1,49E-03 | 6   |
| Cell Death and Survival, Connective Tissue Development and Function                                                       | cell viability of fibroblast cell lines                       | 1,49E-03 | 7   |
| Cell Morphology                                                                                                           | morphology of antigen presenting cells                        | 1,49E-03 | 7   |

|                                                                                                                                                                  |                                                         |          |    |
|------------------------------------------------------------------------------------------------------------------------------------------------------------------|---------------------------------------------------------|----------|----|
| Protein Synthesis                                                                                                                                                | quantity of GPT in blood                                | 1,55E-03 | 5  |
| Cell Morphology, Nervous System Development and Function                                                                                                         | morphology of neuroglia                                 | 1,56E-03 | 7  |
| Inflammatory Response                                                                                                                                            | acute inflammatory response of lung                     | 1,74E-03 | 2  |
| Cell-To-Cell Signaling and Interaction, Cellular Compromise, Neurological Disease, Organismal Injury and Abnormalities                                           | damage of dopaminergic neurons                          | 1,74E-03 | 2  |
| Cell Death and Survival                                                                                                                                          | killing of gonadal cell lines                           | 1,74E-03 | 2  |
| Cancer, Gastrointestinal Disease, Organismal Injury and Abnormalities                                                                                            | tumorigenesis of intestinal tissue                      | 1,74E-03 | 2  |
| Hematological Disease, Infectious Diseases                                                                                                                       | parasitemia                                             | 1,78E-03 | 5  |
| Cell Death and Survival                                                                                                                                          | apoptosis                                               | 1,84E-03 | 70 |
| Cellular Assembly and Organization                                                                                                                               | organization of organelle                               | 1,94E-03 | 20 |
| Tissue Morphology                                                                                                                                                | abnormal morphology of atrioventricular canal cushion   | 1,96E-03 | 3  |
| Inflammatory Response                                                                                                                                            | inflammatory response of lung                           | 1,96E-03 | 3  |
| Hematological System Development and Function, Inflammatory Response, Tissue Morphology                                                                          | quantity of myeloid dendritic cells                     | 1,96E-03 | 3  |
| Cell Cycle                                                                                                                                                       | cell cycle progression                                  | 1,97E-03 | 33 |
| Hematological System Development and Function, Tissue Morphology                                                                                                 | quantity of antigen presenting cells                    | 2,01E-03 | 12 |
| Cancer, Hematological Disease, Immunological Disease, Organismal Injury and Abnormalities                                                                        | Waldenstrom's macroglobulinemia                         | 2,38E-03 | 9  |
| Cancer, Hematological Disease, Immunological Disease, Organismal Injury and Abnormalities                                                                        | grade 1 lymphocytic cancer                              | 2,47E-03 | 5  |
| Behavior                                                                                                                                                         | sickness behavior                                       | 2,59E-03 | 2  |
| Tissue Morphology                                                                                                                                                | abnormal morphology of abdominal fat pad                | 2,64E-03 | 3  |
| Cell Cycle                                                                                                                                                       | mitosis                                                 | 2,86E-03 | 18 |
| Reproductive System Development and Function                                                                                                                     | decidualization of uterus                               | 3,03E-03 | 3  |
| Cell Death and Survival, Organismal Injury and Abnormalities, Renal and Urological Disease                                                                       | cell death of tubular cells                             | 3,04E-03 | 4  |
| Developmental Disorder                                                                                                                                           | incomplete turning of embryo                            | 3,04E-03 | 4  |
| Cell Cycle                                                                                                                                                       | formation of mitotic spindle                            | 3,15E-03 | 5  |
| Cell Death and Survival                                                                                                                                          | apoptosis of intestinal cells                           | 3,57E-03 | 4  |
| Tissue Morphology                                                                                                                                                | lack of vitelline vessel                                | 3,57E-03 | 4  |
| Connective Tissue Development and Function, Skeletal and Muscular System Development and Function, Tissue Development                                            | abnormal morphology of secondary center of ossification | 3,59E-03 | 2  |
| Cell-To-Cell Signaling and Interaction, Hematological System Development and Function, Hypersensitivity Response, Immune Cell Trafficking, Inflammatory Response | activation of bone marrow-derived mast cells            | 3,59E-03 | 2  |
| Cellular Development, Skeletal and Muscular System Development and Function, Tissue Development                                                                  | differentiation of skeletal muscle satellite cells      | 3,59E-03 | 2  |
| Cell Cycle                                                                                                                                                       | length of mitotic spindle                               | 3,59E-03 | 2  |
| Cellular Compromise, Gastrointestinal Disease, Hepatic System Disease, Organismal Injury and Abnormalities                                                       | oxidative stress response of hepatocytes                | 3,59E-03 | 2  |
| Cellular Movement, Hematological System Development and Function, Immune Cell Trafficking, Inflammatory Response                                                 | sequestration of neutrophils                            | 3,59E-03 | 2  |
| Developmental Disorder, Endocrine System Disorders, Hereditary Disorder, Organismal Injury and Abnormalities, Reproductive System Disease                        | globozoospermia                                         | 3,90E-03 | 3  |
| Infectious Diseases                                                                                                                                              | Parasitic Infection                                     | 3,92E-03 | 8  |
| Tissue Morphology                                                                                                                                                | quantity of bacteria                                    | 4,15E-03 | 4  |
| Cell Death and Survival, Organismal Injury and Abnormalities, Renal and Urological Disease                                                                       | cell death of renal tubular epithelial cells            | 4,39E-03 | 3  |
| Lipid Metabolism, Molecular Transport, Small Molecule Biochemistry                                                                                               | release of eicosanoid                                   | 4,46E-03 | 7  |

|                                                                                                      |                                                 |          |     |
|------------------------------------------------------------------------------------------------------|-------------------------------------------------|----------|-----|
| Embryonic Development, Tissue Morphology                                                             | abnormal morphology of atrioventricular canal   | 4,74E-03 | 2   |
| Cell Death and Survival                                                                              | apoptosis of colonocytes                        | 4,74E-03 | 2   |
| Neurological Disease                                                                                 | clonic seizure                                  | 4,74E-03 | 2   |
| Cellular Growth and Proliferation, Organismal Development                                            | growth of Chlamydia pneumoniae                  | 4,74E-03 | 2   |
| Cellular Function and Maintenance, Hematopoiesis                                                     | homeostasis of hematopoietic progenitor cells   | 4,74E-03 | 2   |
| Infectious Diseases                                                                                  | infection by chlamydia                          | 4,74E-03 | 2   |
| Cell Signaling                                                                                       | integration of HIV-1                            | 4,74E-03 | 2   |
| Neurological Disease                                                                                 | preclinical stage amyotrophic lateral sclerosis | 4,74E-03 | 2   |
| Embryonic Development, Tissue Morphology                                                             | morphology of yolk sac                          | 4,74E-03 | 6   |
| Cell Death and Survival, Hematological System Development and Function                               | cell viability of neutrophils                   | 4,91E-03 | 3   |
| Digestive System Development and Function, Hepatic System Development and Function, Organ Morphology | regeneration of liver                           | 5,15E-03 | 5   |
| Nervous System Development and Function, Skeletal and Muscular System Development and Function       | motor function                                  | 5,15E-03 | 6   |
| Cell Cycle, Reproductive System Development and Function                                             | meiosis of germ cells                           | 5,37E-03 | 6   |
| Developmental Disorder                                                                               | abnormal turning of embryo                      | 5,42E-03 | 5   |
| Cellular Assembly and Organization, DNA Replication, Recombination, and Repair                       | alignment of chromosomes                        | 5,47E-03 | 3   |
| Carbohydrate Metabolism, Lipid Metabolism, Small Molecule Biochemistry                               | hydrolysis of choline-phospholipid              | 5,47E-03 | 3   |
| Cell Death and Survival                                                                              | cell death of macrophage cancer cell lines      | 5,50E-03 | 4   |
| Cell Death and Survival                                                                              | cell death of epithelial cells                  | 5,75E-03 | 17  |
| Cellular Function and Maintenance, Hematological System Development and Function                     | function of macrophages                         | 5,83E-03 | 8   |
| Cardiovascular Disease, Developmental Disorder, Organismal Injury and Abnormalities                  | hypoplasia of heart ventricle                   | 5,88E-03 | 4   |
| Cell Morphology                                                                                      | polarization of cells                           | 6,01E-03 | 8   |
| Nervous System Development and Function, Organ Morphology, Organismal Development                    | abnormal morphology of optic tract              | 6,04E-03 | 2   |
| Cell-To-Cell Signaling and Interaction                                                               | clustering of tumor cell lines                  | 6,04E-03 | 2   |
| Cell Death and Survival                                                                              | necroptosis of fibroblasts                      | 6,04E-03 | 2   |
| Cell-To-Cell Signaling and Interaction, Cellular Function and Maintenance, Inflammatory Response     | phagocytosis by dendritic cells                 | 6,04E-03 | 2   |
| Cell-To-Cell Signaling and Interaction                                                               | recognition of bacteria                         | 6,04E-03 | 2   |
| Lipid Metabolism, Molecular Transport, Small Molecule Biochemistry                                   | release of prostaglandin D2                     | 6,04E-03 | 2   |
| Cell Death and Survival, Organismal Injury and Abnormalities, Renal and Urological Disease           | cell death of kidney cells                      | 6,05E-03 | 13  |
| Lipid Metabolism, Small Molecule Biochemistry                                                        | incorporation of fatty acid                     | 6,07E-03 | 3   |
| RNA Post-Transcriptional Modification                                                                | processing of rRNA                              | 6,28E-03 | 4   |
| Cancer, Organismal Injury and Abnormalities                                                          | malignant solid tumor                           | 6,34E-03 | 237 |
| Inflammatory Response                                                                                | acute inflammatory response                     | 6,71E-03 | 3   |
| Cardiovascular Disease                                                                               | advanced stage peripheral arterial disease      | 6,92E-03 | 7   |
| Tissue Morphology                                                                                    | abnormal morphology of fat pad                  | 7,12E-03 | 4   |
| Hematological Disease, Infectious Diseases                                                           | malaria                                         | 7,12E-03 | 4   |
| Lipid Metabolism, Molecular Transport, Small Molecule Biochemistry                                   | release of prostaglandin                        | 7,12E-03 | 4   |

|                                                                                                                                                                                                                                                               |                                             |          |     |
|---------------------------------------------------------------------------------------------------------------------------------------------------------------------------------------------------------------------------------------------------------------|---------------------------------------------|----------|-----|
| Protein Synthesis                                                                                                                                                                                                                                             | quantity of enzyme                          | 7,32E-03 | 6   |
| Infectious Diseases                                                                                                                                                                                                                                           | Streptococcal infection                     | 7,38E-03 | 3   |
| Cell Morphology, Hematological System Development and Function, Inflammatory Response                                                                                                                                                                         | M1 polarization of macrophages              | 7,49E-03 | 2   |
| Cell Death and Survival, Cellular Function and Maintenance                                                                                                                                                                                                    | clearance of E. coli                        | 7,49E-03 | 2   |
| Cellular Function and Maintenance                                                                                                                                                                                                                             | endocytosis by dendritic cells              | 7,49E-03 | 2   |
| Embryonic Development, Gastrointestinal Disease, Hepatic System Development and Function, Hepatic System Disease, Organ Development, Organismal Development, Cell-To-Cell Signaling and Interaction, Cellular Function and Maintenance, Inflammatory Response | fibrogenesis of liver                       | 7,49E-03 | 2   |
| Cell Morphology, Hematological System Development and Function, Humoral Immune Response                                                                                                                                                                       | phagocytosis of connective tissue cells     | 7,49E-03 | 2   |
| Antigen Presentation, Inflammatory Response                                                                                                                                                                                                                   | polarization of B lymphocytes               | 7,49E-03 | 2   |
| Cardiovascular Disease, Organismal Injury and Abnormalities                                                                                                                                                                                                   | processing of antigen                       | 7,49E-03 | 2   |
| Cancer, Organismal Injury and Abnormalities                                                                                                                                                                                                                   | systolic heart failure                      | 7,49E-03 | 2   |
| Organismal Injury and Abnormalities, Reproductive System Disease                                                                                                                                                                                              | tumorigenesis of tissue                     | 7,86E-03 | 225 |
| Lipid Metabolism, Molecular Transport, Small Molecule Biochemistry                                                                                                                                                                                            | oligozoospermia                             | 7,88E-03 | 6   |
| Gastrointestinal Disease, Hepatic System Disease, Organismal Injury and Abnormalities                                                                                                                                                                         | release of arachidonic acid                 | 7,92E-03 | 5   |
| Cellular Development, Cellular Growth and Proliferation, Nervous System Development and Function, Tissue Development                                                                                                                                          | bleeding of liver                           | 8,09E-03 | 3   |
| Gastrointestinal Disease, Hepatic System Disease, Organismal Injury and Abnormalities                                                                                                                                                                         | development of astrocytes                   | 8,09E-03 | 3   |
| Organismal Injury and Abnormalities, Skeletal and Muscular Disorders                                                                                                                                                                                          | degeneration of liver                       | 8,84E-03 | 3   |
| Cellular Function and Maintenance, Hematological System Development and Function                                                                                                                                                                              | atrophy of gastrocnemius                    | 9,07E-03 | 2   |
| Gastrointestinal Disease, Organismal Injury and Abnormalities                                                                                                                                                                                                 | function of natural killer T lymphocytes    | 9,07E-03 | 2   |
| DNA Replication, Recombination, and Repair                                                                                                                                                                                                                    | injury of colon                             | 9,07E-03 | 2   |
| Hematological Disease, Immunological Disease, Organismal Injury and Abnormalities, Respiratory Disease                                                                                                                                                        | mutation of gene                            | 9,07E-03 | 2   |
| Gene Expression                                                                                                                                                                                                                                               | neutrophilia of airway                      | 9,07E-03 | 2   |
| Cell Death and Survival                                                                                                                                                                                                                                       | paternal imprinting                         | 9,07E-03 | 2   |
| Lipid Metabolism, Small Molecule Biochemistry                                                                                                                                                                                                                 | apoptosis of myeloid cells                  | 9,08E-03 | 8   |
| Connective Tissue Development and Function, Skeletal and Muscular System Development and Function, Tissue Development                                                                                                                                         | homeostasis of lipid                        | 9,08E-03 | 8   |
| Cell Death and Survival, Cellular Function and Maintenance                                                                                                                                                                                                    | abnormal morphology of compact bone         | 9,63E-03 | 3   |
| Cell Death and Survival, Gastrointestinal Disease, Hepatic System Disease, Organismal Injury and Abnormalities                                                                                                                                                | clearance of cells                          | 9,84E-03 | 5   |
| Organ Morphology, Organismal Development, Renal and Urological System Development and Function                                                                                                                                                                | apoptosis of liver cells                    | 9,98E-03 | 7   |
| Hematological System Development and Function, Inflammatory Response, Tissue Morphology                                                                                                                                                                       | abnormal morphology of dilated renal tubule | 1,01E-02 | 4   |
| RNA Post-Transcriptional Modification                                                                                                                                                                                                                         | quantity of dendritic cells                 | 1,04E-02 | 6   |
| Cellular Function and Maintenance, Hematological System Development and Function                                                                                                                                                                              | splicing of RNA                             | 1,06E-02 | 7   |
| Cellular Assembly and Organization, DNA Replication, Recombination, and Repair                                                                                                                                                                                | function of CD4+ T-lymphocytes              | 1,07E-02 | 4   |
| Respiratory Disease                                                                                                                                                                                                                                           | chromosomal congression of chromosomes      | 1,08E-02 | 2   |
| Cell-To-Cell Signaling and Interaction, Inflammatory Response                                                                                                                                                                                                 | constriction of bronchus                    | 1,08E-02 | 2   |
| Lipid Metabolism, Small Molecule Biochemistry                                                                                                                                                                                                                 | immune response of epithelial cells         | 1,08E-02 | 2   |
| Nucleic Acid Metabolism, Small Molecule Biochemistry                                                                                                                                                                                                          | incorporation of palmitic acid              | 1,08E-02 | 2   |
|                                                                                                                                                                                                                                                               | metabolism of NADH                          | 1,08E-02 | 2   |

|                                                                                                                                                        |                                                                                          |          |    |
|--------------------------------------------------------------------------------------------------------------------------------------------------------|------------------------------------------------------------------------------------------|----------|----|
| Cardiovascular System Development and Function, Embryonic Development, Organismal Development, Tissue Development                                      | vascularization of yolk sac                                                              | 1,08E-02 | 2  |
| Cellular Assembly and Organization, Cellular Function and Maintenance                                                                                  | maintenance of telomeres                                                                 | 1,12E-02 | 4  |
| Cell Cycle, Cell Morphology, Cellular Assembly and Organization, DNA Replication, Recombination, and Repair                                            | abnormal morphology of chromosomes                                                       | 1,13E-02 | 3  |
| Cell Morphology, Cellular Assembly and Organization, Cellular Function and Maintenance                                                                 | reorganization of actin filaments                                                        | 1,13E-02 | 3  |
| Energy Production                                                                                                                                      | consumption of oxygen                                                                    | 1,15E-02 | 7  |
| Organismal Survival                                                                                                                                    | morbidity or mortality                                                                   | 1,15E-02 | 61 |
| Embryonic Development, Tissue Morphology                                                                                                               | abnormal morphology of visceral yolk sac                                                 | 1,18E-02 | 4  |
| Cell Morphology, Cellular Assembly and Organization, Cellular Function and Maintenance                                                                 | reorganization of actin cytoskeleton                                                     | 1,19E-02 | 6  |
| Cellular Function and Maintenance                                                                                                                      | function of phagocytes                                                                   | 1,20E-02 | 11 |
| Cellular Movement, Reproductive System Development and Function                                                                                        | cell movement of breast cell lines                                                       | 1,21E-02 | 5  |
| Cell-To-Cell Signaling and Interaction, Inflammatory Response                                                                                          | immune response of leukocyte cell lines                                                  | 1,22E-02 | 3  |
| Protein Synthesis                                                                                                                                      | quantity of aspartate transaminase in blood                                              | 1,22E-02 | 3  |
| Cell Death and Survival, Gastrointestinal Disease, Hepatic System Disease, Organismal Injury and Abnormalities                                         | cell death of liver cells                                                                | 1,23E-02 | 8  |
| Organismal Development                                                                                                                                 | abnormal morphology of body cavity                                                       | 1,26E-02 | 33 |
| Protein Synthesis                                                                                                                                      | abnormal quantity of enzyme in blood                                                     | 1,26E-02 | 2  |
| Cellular Compromise, DNA Replication, Recombination, and Repair                                                                                        | breakdown of chromosomes                                                                 | 1,26E-02 | 2  |
| Infectious Diseases, Organismal Injury and Abnormalities, Renal and Urological Disease                                                                 | infection of kidney                                                                      | 1,26E-02 | 2  |
| Tissue Morphology                                                                                                                                      | morphology of extraembryonic tissue                                                      | 1,29E-02 | 8  |
| Organismal Survival                                                                                                                                    | organismal death                                                                         | 1,30E-02 | 60 |
| Cardiovascular Disease, Developmental Disorder, Organismal Injury and Abnormalities                                                                    | hypoplasia of trabeculae carne                                                           | 1,32E-02 | 3  |
| Protein Synthesis                                                                                                                                      | quantity of alkaline phosphatase in blood                                                | 1,32E-02 | 3  |
| Hematological Disease, Hereditary Disorder, Organismal Injury and Abnormalities                                                                        | CD36 deficiency                                                                          | 1,34E-02 | 1  |
| Connective Tissue Disorders, Developmental Disorder, Hereditary Disorder, Organismal Injury and Abnormalities, Skeletal and Muscular Disorders         | Catel-Manzke syndrome                                                                    | 1,34E-02 | 1  |
| Connective Tissue Disorders, Developmental Disorder, Hereditary Disorder, Organismal Injury and Abnormalities, Skeletal and Muscular Disorders         | Cole-Carpenter syndrome type 1                                                           | 1,34E-02 | 1  |
| Cardiovascular Disease, Developmental Disorder, Hematological Disease, Hereditary Disorder, Organismal Injury and Abnormalities                        | Fanconi's anemia group G                                                                 | 1,34E-02 | 1  |
| Developmental Disorder, Endocrine System Disorders, Hematological Disease, Hereditary Disorder, Metabolic Disease, Organismal Injury and Abnormalities | Kenny-Caffey syndrome type 2                                                             | 1,34E-02 | 1  |
| Connective Tissue Disorders, Developmental Disorder, Skeletal and Muscular Disorders                                                                   | Lethal arthrogryposis with anterior horn cell disease                                    | 1,34E-02 | 1  |
| Neurological Disease, Organismal Injury and Abnormalities, Skeletal and Muscular Disorders                                                             | Lethal congenital contractural syndrom finnish type                                      | 1,34E-02 | 1  |
| Disorder, Hereditary Disorder, Immunological Disease, Organismal Injury and Abnormalities, Skeletal and Muscular Disorders                             | OL-EDA-ID syndrome                                                                       | 1,34E-02 | 1  |
| Cardiovascular Disease, Developmental Disorder, Hematological Disease, Hereditary Disorder, Immunological Disease, Organismal Injury and Abnormalities | T-cell immunodeficiency, recurrent infections, autoimmunity, and cardiac malformations   | 1,34E-02 | 1  |
| Developmental Disorder, Hereditary Disorder, Neurological Disease, Organismal Injury and Abnormalities                                                 | X linked mental retardation syndromic jarid1c-related                                    | 1,34E-02 | 1  |
| Hereditary Disorder, Immunological Disease, Infectious Diseases, Organismal Injury and Abnormalities                                                   | X-linked familial atypical mycobacteriosis 1                                             | 1,34E-02 | 1  |
| Disease, Hereditary Disorder, Immunological Disease, Organismal Injury and Abnormalities                                                               | X-linked hyper-IgM syndrome with etodermal dysplasia                                     | 1,34E-02 | 1  |
| Developmental Disorder, Hereditary Disorder, Neurological Disease, Organismal Injury and Abnormalities                                                 | X-linked mental retardation type 100                                                     | 1,34E-02 | 1  |
| Developmental Disorder, Hereditary Disorder, Neurological Disease, Organismal Injury and Abnormalities                                                 | X-linked mental retardation with cerebellar hypoplasia and distinctive facial appearance | 1,34E-02 | 1  |
| Cardiovascular System Development and Function, Tissue Morphology                                                                                      | abnormal morphology of superior vena cava                                                | 1,34E-02 | 1  |

|                                                                                                                                                                                                                                                                                      |                                                            |          |   |
|--------------------------------------------------------------------------------------------------------------------------------------------------------------------------------------------------------------------------------------------------------------------------------------|------------------------------------------------------------|----------|---|
| Small Molecule Biochemistry                                                                                                                                                                                                                                                          | absorption of fexofenadine                                 | 1,34E-02 | 1 |
| Lipid Metabolism, Molecular Transport, Small Molecule Biochemistry                                                                                                                                                                                                                   | absorption of pravastatin                                  | 1,34E-02 | 1 |
| Tissue Development                                                                                                                                                                                                                                                                   | accumulation of lymphoblastoid cell lines                  | 1,34E-02 | 1 |
| Organismal Development                                                                                                                                                                                                                                                               | accumulation of mucus                                      | 1,34E-02 | 1 |
| Cellular Compromise, Nervous System Development and Function                                                                                                                                                                                                                         | acidification of synaptic vesicles                         | 1,34E-02 | 1 |
| Lipid Metabolism, Small Molecule Biochemistry                                                                                                                                                                                                                                        | activation of epoprostenol                                 | 1,34E-02 | 1 |
| Cell-To-Cell Signaling and Interaction, Hematological System Development and Function, Immune Cell Trafficking, Inflammatory Response                                                                                                                                                | activation of follicular dendritic cells                   | 1,34E-02 | 1 |
| Inflammatory Response, Respiratory System Development and Function                                                                                                                                                                                                                   | acute inflammatory response of airway                      | 1,34E-02 | 1 |
| Cell-To-Cell Signaling and Interaction, Hematological System Development and Function, Immune Cell Trafficking, Inflammatory Response                                                                                                                                                | adhesion of Langerhans cells                               | 1,34E-02 | 1 |
| Embryonic Development, Tissue Development                                                                                                                                                                                                                                            | adhesion of embryoblast                                    | 1,34E-02 | 1 |
| Cell-To-Cell Signaling and Interaction                                                                                                                                                                                                                                               | adhesion of neural stem cells                              | 1,34E-02 | 1 |
| Ophthalmic Disease, Organismal Injury and Abnormalities                                                                                                                                                                                                                              | age-related macular degeneration type 10                   | 1,34E-02 | 1 |
| Cell-To-Cell Signaling and Interaction                                                                                                                                                                                                                                               | aggregation of endothelial cells                           | 1,34E-02 | 1 |
| Cell Cycle, Hepatic System Development and Function                                                                                                                                                                                                                                  | aneuploidy of hepatocytes                                  | 1,34E-02 | 1 |
| Ophthalmic Disease, Organismal Injury and Abnormalities                                                                                                                                                                                                                              | anisocoria                                                 | 1,34E-02 | 1 |
| Developmental Disorder, Organismal Injury and Abnormalities, Reproductive System Disease                                                                                                                                                                                             | apocrine metaplasia of mammary gland                       | 1,34E-02 | 1 |
| Cell Death and Survival                                                                                                                                                                                                                                                              | apoptosis of B-2 lymphocytes                               | 1,34E-02 | 1 |
| Cell Death and Survival                                                                                                                                                                                                                                                              | apoptosis of fibroblastoids                                | 1,34E-02 | 1 |
| Cell Death and Survival, Neurological Disease                                                                                                                                                                                                                                        | apoptosis of gonadotropes                                  | 1,34E-02 | 1 |
| Cell Death and Survival, Skeletal and Muscular Disorders                                                                                                                                                                                                                             | apoptosis of neointimal cells                              | 1,34E-02 | 1 |
| Cardiovascular System Development and Function, Organismal Development, Tissue Morphology                                                                                                                                                                                            | area of left common carotid artery                         | 1,34E-02 | 1 |
| Cardiovascular System Development and Function, Organismal Development, Tissue Morphology                                                                                                                                                                                            | area of right common carotid artery                        | 1,34E-02 | 1 |
| Cell Cycle                                                                                                                                                                                                                                                                           | arrest in G2/M phase transition of lymphoblasts            | 1,34E-02 | 1 |
| Cell Cycle                                                                                                                                                                                                                                                                           | arrest in cell division of bone cancer cell lines          | 1,34E-02 | 1 |
| Cell Cycle                                                                                                                                                                                                                                                                           | arrest in cell division of sarcoma cell lines              | 1,34E-02 | 1 |
| Development and Function, Hematopoiesis, Humoral Immune Response, Lymphoid Tissue Structure and Development, Tissue Development                                                                                                                                                      | arrest in development of B-1 lymphocytes                   | 1,34E-02 | 1 |
| Hematological System Development and Function, Hematopoiesis, Humoral Immune Response, Lymphoid Tissue Structure and Development, Organ Development, Development and Function, Hematopoiesis, Humoral Immune Response, Lymphoid Tissue Structure and Development, Tissue Development | arrest in development of marginal-zone B lymphocytes       | 1,34E-02 | 1 |
| Development and Function, Hematopoiesis, Humoral Immune Response, Lymphoid Tissue Structure and Development, Tissue Development                                                                                                                                                      | arrest in development of transitional B lymphocytes        | 1,34E-02 | 1 |
| Development and Function, Hematopoiesis, Humoral Immune Response, Lymphoid Tissue Structure and Development, Tissue Development                                                                                                                                                      | arrest in development of transitional type 1 B lymphocytes | 1,34E-02 | 1 |
| Cellular Development, Embryonic Development, Hematological System Development and Function, Hematopoiesis, Organ Development, Organismal Development                                                                                                                                 | arrest in maturation of thymocytes                         | 1,34E-02 | 1 |
| Cell Cycle, Reproductive System Development and Function                                                                                                                                                                                                                             | arrest in meiosis of sperm                                 | 1,34E-02 | 1 |
| Cardiovascular Disease, Organismal Injury and Abnormalities, Skeletal and Muscular Disorders                                                                                                                                                                                         | arrhythmogenic right ventricular dysplasia familial 12     | 1,34E-02 | 1 |
| Cell-To-Cell Signaling and Interaction                                                                                                                                                                                                                                               | attachment of blood platelets                              | 1,34E-02 | 1 |
| Dermatological Diseases and Conditions, Developmental Disorder, Hereditary Disorder, Organismal Injury and Abnormalities                                                                                                                                                             | atypical incontinentia pigmenti                            | 1,34E-02 | 1 |
| Cell Death and Survival, Cell Morphology, Cellular Function and Maintenance                                                                                                                                                                                                          | autophagic cell death of cervical cancer cell lines        | 1,34E-02 | 1 |
| Cancer, Gastrointestinal Disease, Hereditary Disorder, Organismal Injury and Abnormalities                                                                                                                                                                                           | autosomal dominant hereditary diffuse gastric cancer       | 1,34E-02 | 1 |

|                                                                                                                                                |                                                         |          |   |
|------------------------------------------------------------------------------------------------------------------------------------------------|---------------------------------------------------------|----------|---|
| Dermatological Diseases and Conditions, Developmental Disorder, Hereditary Disorder, Organismal Injury and Abnormalities                       | autosomal recessive dyskeratosis congenita type 3       | 1,34E-02 | 1 |
| Developmental Disorder, Hereditary Disorder, Neurological Disease, Organismal Injury and Abnormalities                                         | autosomal recessive mental retardation type 37          | 1,34E-02 | 1 |
| Hereditary Disorder, Neurological Disease, Organismal Injury and Abnormalities                                                                 | autosomal recessive spastic paraplegia type 46          | 1,34E-02 | 1 |
| Cell-To-Cell Signaling and Interaction                                                                                                         | binding of colon cell lines                             | 1,34E-02 | 1 |
| Cell-To-Cell Signaling and Interaction                                                                                                         | binding of colonocytes                                  | 1,34E-02 | 1 |
| Gene Expression                                                                                                                                | binding of double-stranded DNA                          | 1,34E-02 | 1 |
| Gene Expression                                                                                                                                | binding of origin of replication in the short region    | 1,34E-02 | 1 |
| Carbohydrate Metabolism, Lipid Metabolism, Small Molecule Biochemistry                                                                         | binding of phosphatidylinositol 4-phosphate             | 1,34E-02 | 1 |
| Cellular Assembly and Organization                                                                                                             | biogenesis of lateral plasma membrane                   | 1,34E-02 | 1 |
| Lipid Metabolism, Small Molecule Biochemistry, Vitamin and Mineral Metabolism                                                                  | biosynthesis of dolichol monophosphate                  | 1,34E-02 | 1 |
| Developmental Disorder, Hereditary Disorder, Metabolic Disease, Organismal Injury and Abnormalities                                            | branched-chain ketoacid dehydrogenase kinase deficiency | 1,34E-02 | 1 |
| Cell Morphology, Cellular Development, Cellular Growth and Proliferation, Embryonic Development                                                | branching of breast cancer cell lines                   | 1,34E-02 | 1 |
| Respiratory Disease                                                                                                                            | bronchoconstriction of lung                             | 1,34E-02 | 1 |
| Small Molecule Biochemistry                                                                                                                    | catabolism of spermidine                                | 1,34E-02 | 1 |
| Cell Death and Survival                                                                                                                        | cell death of Fanconi's anemia cell lines               | 1,34E-02 | 1 |
| Cellular Movement                                                                                                                              | cell movement of keratinocyte cancer cell lines         | 1,34E-02 | 1 |
| Cell Death and Survival                                                                                                                        | cell viability of gonadotropes                          | 1,34E-02 | 1 |
| Cell Death and Survival, Hematological System Development and Function                                                                         | cell viability of long-term hematopoietic stem cells    | 1,34E-02 | 1 |
| Cell-To-Cell Signaling and Interaction                                                                                                         | cell-cell contact of breast cell lines                  | 1,34E-02 | 1 |
| Cell-To-Cell Signaling and Interaction, Embryonic Development                                                                                  | cell-cell contact of embryonic stem cell lines          | 1,34E-02 | 1 |
| Cell-To-Cell Signaling and Interaction, Embryonic Development                                                                                  | cell-cell contact of embryonic stem cells               | 1,34E-02 | 1 |
| Cell-To-Cell Signaling and Interaction                                                                                                         | cell-cell contact of squamous carcinoma cells           | 1,34E-02 | 1 |
| Connective Tissue Disorders, Developmental Disorder, Hereditary Disorder, Organismal Injury and Abnormalities, Skeletal and Muscular Disorders | chondrodysplasia of femur                               | 1,34E-02 | 1 |
| Connective Tissue Disorders, Developmental Disorder, Hereditary Disorder, Organismal Injury and Abnormalities, Skeletal and Muscular Disorders | chondrodysplasia of humerus                             | 1,34E-02 | 1 |
| Cell Death and Survival, Cellular Function and Maintenance                                                                                     | clearance of Burkholderia pseudomallei strain 1026b     | 1,34E-02 | 1 |
| Antimicrobial Response                                                                                                                         | clearance of human respiratory syncytial virus A2       | 1,34E-02 | 1 |
| Function, Humoral Immune Response, Immune Cell Trafficking, Inflammatory Response                                                              | clustering of B lymphocytes                             | 1,34E-02 | 1 |
| Cell-To-Cell Signaling and Interaction, Skeletal and Muscular System Development and Function                                                  | clustering of muscle cell lines                         | 1,34E-02 | 1 |
| Cancer, Gastrointestinal Disease, Organismal Injury and Abnormalities                                                                          | colorectal cancer with distant metastasis               | 1,34E-02 | 1 |
| Developmental Disorder, Hereditary Disorder, Metabolic Disease, Organismal Injury and Abnormalities                                            | congenital disorder of glycosylation type 1m            | 1,34E-02 | 1 |
| Carbohydrate Metabolism, Lipid Metabolism, Small Molecule Biochemistry                                                                         | conjugation of phosphatidylethanolamine                 | 1,34E-02 | 1 |
| Amino Acid Metabolism, Post-Translational Modification, Small Molecule Biochemistry                                                            | conversion of L-lysine                                  | 1,34E-02 | 1 |
| Cell Death and Survival, Cellular Compromise                                                                                                   | cytotoxicity of lymphoma cell lines                     | 1,34E-02 | 1 |
| Cellular Compromise, Neurological Disease, Organismal Injury and Abnormalities                                                                 | damage of CA3 neurons                                   | 1,34E-02 | 1 |
| Hereditary Disorder, Metabolic Disease, Organismal Injury and Abnormalities                                                                    | deficiency of group IV A phospholipase A2               | 1,34E-02 | 1 |
| Cellular Compromise                                                                                                                            | deformation of spindle pole                             | 1,34E-02 | 1 |

|                                                                                                                                                                    |                                                                          |          |   |
|--------------------------------------------------------------------------------------------------------------------------------------------------------------------|--------------------------------------------------------------------------|----------|---|
| Developmental Disorder, Embryonic Development, Tissue Morphology                                                                                                   | degeneration of yolk sac                                                 | 1,34E-02 | 1 |
| Cellular Compromise, Inflammatory Response                                                                                                                         | degranulation of dendritic epidermal T cells                             | 1,34E-02 | 1 |
| Reproductive System Development and Function                                                                                                                       | delay in gestation                                                       | 1,34E-02 | 1 |
| Cellular Development, Cellular Growth and Proliferation                                                                                                            | delay in growth of breast cancer cell lines                              | 1,34E-02 | 1 |
| Cellular Assembly and Organization, DNA Replication, Recombination, and Repair                                                                                     | delay in initiation of chromosomal congression of chromosomes            | 1,34E-02 | 1 |
| Cell Death and Survival, Cellular Function and Maintenance                                                                                                         | delay in initiation of clearance of pneumocytes                          | 1,34E-02 | 1 |
| Cellular Compromise                                                                                                                                                | depletion of hippocampal neurons                                         | 1,34E-02 | 1 |
| Cancer, Dermatological Diseases and Conditions, Organismal Injury and Abnormalities                                                                                | dermal neurofibroma                                                      | 1,34E-02 | 1 |
| Organ Morphology, Respiratory Disease, Tissue Morphology                                                                                                           | destruction of lung tissue                                               | 1,34E-02 | 1 |
| Embryonic Development, Hair and Skin Development and Function, Organ Development, Organismal Development, Tissue Development                                       | development of hair cuticle                                              | 1,34E-02 | 1 |
| Nervous System Development and Function                                                                                                                            | development of limbic system                                             | 1,34E-02 | 1 |
| Growth and Proliferation, Embryonic Development, Organ Development, Organismal Development, Tissue Development                                                     | development of pacemaker cells                                           | 1,34E-02 | 1 |
| Cardiovascular System Development and Function, Tissue Morphology                                                                                                  | diameter of left common carotid artery                                   | 1,34E-02 | 1 |
| Cardiovascular System Development and Function, Tissue Morphology                                                                                                  | diameter of right common carotid artery                                  | 1,34E-02 | 1 |
| Cellular Development, Endocrine System Development and Function                                                                                                    | differentiation of enteroendocrine cells                                 | 1,34E-02 | 1 |
| Cellular Compromise, DNA Replication, Recombination, and Repair                                                                                                    | disintegration of genomes                                                | 1,34E-02 | 1 |
| Cellular Assembly and Organization, Cellular Compromise                                                                                                            | disruption of vimentin filaments                                         | 1,34E-02 | 1 |
| Cardiovascular Disease, Neurological Disease, Organismal Injury and Abnormalities, Skeletal and Muscular Disorders                                                 | dystonia progressive cerebellar atrophy and dilated cardiomyopathy       | 1,34E-02 | 1 |
| Cardiovascular System Development and Function, Cell Morphology, Skeletal and Muscular System Development and Function                                             | electrical capacitance of ventricular myocytes                           | 1,34E-02 | 1 |
| Cellular Compromise, Cellular Function and Maintenance                                                                                                             | endoplasmic reticulum stress response of melanoma cell lines             | 1,34E-02 | 1 |
| Organ Morphology                                                                                                                                                   | enlargement of kidney                                                    | 1,34E-02 | 1 |
| Cell Cycle                                                                                                                                                         | entry into S phase of skin cancer cell lines                             | 1,34E-02 | 1 |
| Endocrine System Disorders, Gastrointestinal Disease, Hematological Disease, Hereditary Disorder, Organismal Injury and Abnormalities, Skeletal and Muscular       | dyserthropoietic anemia, and calvarial hyperostosis                      | 1,34E-02 | 1 |
| Cellular Development, Cellular Growth and Proliferation                                                                                                            | expansion of bladder cancer cell lines                                   | 1,34E-02 | 1 |
| Connective Tissue Development and Function, Tissue Development                                                                                                     | expansion of brown adipose tissue                                        | 1,34E-02 | 1 |
| Connective Tissue Development and Function, Organ Development, Reproductive System Development and Function, Tissue Development                                    | expansion of epididymal fat                                              | 1,34E-02 | 1 |
| Connective Tissue Development and Function, Tissue Development                                                                                                     | expansion of inguinal fat pad                                            | 1,34E-02 | 1 |
| Connective Tissue Development and Function, Tissue Development                                                                                                     | expansion of mesenteric fat                                              | 1,34E-02 | 1 |
| Connective Tissue Development and Function, Tissue Development                                                                                                     | expansion of retroperitoneal white adipose tissue                        | 1,34E-02 | 1 |
| Lipid Metabolism, Molecular Transport, Small Molecule Biochemistry                                                                                                 | extrusion of bile acid                                                   | 1,34E-02 | 1 |
| Conditions, Developmental Disorder, Hereditary Disorder, Immunological Disease, Organismal Development, Organismal Injury and Abnormalities, Skeletal and Muscular | facial dysmorphism, immunodeficiency, livedo, and short stature syndrome | 1,34E-02 | 1 |
| Hereditary Disorder, Immunological Disease, Infectious Diseases, Organismal Injury and Abnormalities                                                               | familial MYD88 deficiency                                                | 1,34E-02 | 1 |
| Cardiovascular Disease, Organismal Injury and Abnormalities                                                                                                        | fibrosis of portal artery                                                | 1,34E-02 | 1 |
| Embryonic Development, Organismal Development, Tissue Development                                                                                                  | formation of blastocele                                                  | 1,34E-02 | 1 |
| Cellular Assembly and Organization                                                                                                                                 | formation of macronuclei                                                 | 1,34E-02 | 1 |
| Cancer, Endocrine System Disorders, Organismal Injury and Abnormalities, Reproductive System Disease                                                               | formation of ovarian adenocarcinoma                                      | 1,34E-02 | 1 |



|                                                                                                                                                                                                                                                                   |                                                                                            |          |   |
|-------------------------------------------------------------------------------------------------------------------------------------------------------------------------------------------------------------------------------------------------------------------|--------------------------------------------------------------------------------------------|----------|---|
| Embryonic Development, Organismal Development, Tissue Development                                                                                                                                                                                                 | formation of trophoectoderm                                                                | 1,34E-02 | 1 |
| Cardiovascular System Development and Function, Organ Development                                                                                                                                                                                                 | function of right ventricle                                                                | 1,34E-02 | 1 |
| Neurological Disease                                                                                                                                                                                                                                              | global cerebral hypomyelination                                                            | 1,34E-02 | 1 |
| Developmental Disorder, Hereditary Disorder, Metabolic Disease, Organismal Injury and Abnormalities, Renal and Urological Disease                                                                                                                                 | glutaric acidemia type I                                                                   | 1,34E-02 | 1 |
| Connective Tissue Disorders, Developmental Disorder, Hereditary Disorder, Organismal Injury and Abnormalities, Skeletal and Muscular Disorders                                                                                                                    | gracile bone dysplasia                                                                     | 1,34E-02 | 1 |
| Cancer, Organismal Injury and Abnormalities                                                                                                                                                                                                                       | growth of cardiovascular neoplasm                                                          | 1,34E-02 | 1 |
| Cellular Development, Cellular Growth and Proliferation, Connective Tissue Development and Function, Tissue Development                                                                                                                                           | growth of fibroblastoids                                                                   | 1,34E-02 | 1 |
| Organismal Functions                                                                                                                                                                                                                                              | healing of gastric epithelial cells                                                        | 1,34E-02 | 1 |
| Organismal Functions, Tissue Morphology                                                                                                                                                                                                                           | healing of intestinal epithelium                                                           | 1,34E-02 | 1 |
| Disease, Hereditary Disorder, Organismal Development, Organismal Injury and Abnormalities, Skeletal and Muscular Disorders                                                                                                                                        | hereditary diffuse gastric cancer and cleft lip                                            | 1,34E-02 | 1 |
| Cancer, Gastrointestinal Disease, Hereditary Disorder, Organismal Injury and Abnormalities                                                                                                                                                                        | hereditary nonpolyposis colorectal cancer type 2                                           | 1,34E-02 | 1 |
| Cancer, Gastrointestinal Disease, Hereditary Disorder, Organismal Injury and Abnormalities                                                                                                                                                                        | hereditary nonpolyposis colorectal cancer type 4                                           | 1,34E-02 | 1 |
| Cellular Function and Maintenance                                                                                                                                                                                                                                 | homeostasis of tumor cells                                                                 | 1,34E-02 | 1 |
| Carbohydrate Metabolism, Lipid Metabolism, Small Molecule Biochemistry                                                                                                                                                                                            | hydrolysis of sn-2-arachidonylphosphatidylcholine                                          | 1,34E-02 | 1 |
| Cell Death and Survival, DNA Replication, Recombination, and Repair                                                                                                                                                                                               | hypercondensation of chromatin                                                             | 1,34E-02 | 1 |
| DNA Replication, Recombination, and Repair                                                                                                                                                                                                                        | hypercondensation of chromosomes                                                           | 1,34E-02 | 1 |
| Cardiovascular Disease, Endocrine System Disorders, Hematological Disease, Metabolic Disease                                                                                                                                                                      | hyperglycemia of portal vein                                                               | 1,34E-02 | 1 |
| Cardiovascular Disease, Endocrine System Disorders, Gastrointestinal Disease, Metabolic Disease                                                                                                                                                                   | hyperinsulinism of portal vein                                                             | 1,34E-02 | 1 |
| Developmental Disorder, Ophthalmic Disease, Organismal Injury and Abnormalities                                                                                                                                                                                   | hypertrophy of cornea                                                                      | 1,34E-02 | 1 |
| System Development and Function, Endocrine System Disorders, Gastrointestinal Disease, Hereditary Disorder, Neurological Disease, Organismal Development, Hereditary Disorder, Neurological Disease, Organismal Injury and Abnormalities, Psychological Disorders | oligodontia and hypogonadotropic hypogonadism                                              | 1,34E-02 | 1 |
|                                                                                                                                                                                                                                                                   | hypomyelinating leukodystrophy type 7 without oligodontia or hypogonadotropic hypogonadism | 1,34E-02 | 1 |
| Cell-To-Cell Signaling and Interaction, Inflammatory Response                                                                                                                                                                                                     | immune response of renal tubular epithelial cells                                          | 1,34E-02 | 1 |
| Cancer, Hematological Disease, Immunological Disease, Organismal Injury and Abnormalities                                                                                                                                                                         | immunoglobulin M monoclonal gammopathy of undetermined significance                        | 1,34E-02 | 1 |
| Lipid Metabolism, Small Molecule Biochemistry                                                                                                                                                                                                                     | incorporation of 15-(4-iodophenyl)-3-methylpentadecanoic acid                              | 1,34E-02 | 1 |
| Cell Signaling, Vitamin and Mineral Metabolism                                                                                                                                                                                                                    | incorporation of Ca <sup>2+</sup>                                                          | 1,34E-02 | 1 |
| Cell-To-Cell Signaling and Interaction, Small Molecule Biochemistry                                                                                                                                                                                               | induction of acetylcholine                                                                 | 1,34E-02 | 1 |
| Lipid Metabolism, Small Molecule Biochemistry                                                                                                                                                                                                                     | induction of diacylglycerol                                                                | 1,34E-02 | 1 |
| Cell-To-Cell Signaling and Interaction, Cellular Growth and Proliferation, Connective Tissue Development and Function                                                                                                                                             | induction of fibroblast cell lines                                                         | 1,34E-02 | 1 |
| Organ Development, Organ Morphology, Reproductive System Development and Function                                                                                                                                                                                 | induction of mammary gland                                                                 | 1,34E-02 | 1 |
| Infectious Diseases                                                                                                                                                                                                                                               | infection by Streptococcus pyogenes                                                        | 1,34E-02 | 1 |
| Infectious Diseases                                                                                                                                                                                                                                               | infection by mouse mammary tumor virus                                                     | 1,34E-02 | 1 |
| Infectious Diseases                                                                                                                                                                                                                                               | infection of cholangiocytes                                                                | 1,34E-02 | 1 |
| Immunological Disease, Infectious Diseases                                                                                                                                                                                                                        | infection of thymus gland                                                                  | 1,34E-02 | 1 |
| Cell Death and Survival                                                                                                                                                                                                                                           | initiation of apoptosis of colorectal cancer cell lines                                    | 1,34E-02 | 1 |
| Function and Maintenance, Cellular Growth and Proliferation, Nervous System Development and Function, Tissue Development                                                                                                                                          | initiation of formation of dendrites                                                       | 1,34E-02 | 1 |
| Organismal Injury and Abnormalities, Respiratory Disease                                                                                                                                                                                                          | injury of alveolar epithelium                                                              | 1,34E-02 | 1 |

|                                                                                                                                                                       |                                                                 |          |   |
|-----------------------------------------------------------------------------------------------------------------------------------------------------------------------|-----------------------------------------------------------------|----------|---|
| Cellular Compromise, Gastrointestinal Disease, Organismal Injury and Abnormalities                                                                                    | injury of enterocytes                                           | 1,34E-02 | 1 |
| Cell-To-Cell Signaling and Interaction                                                                                                                                | intercellular communication of peritoneal macrophages           | 1,34E-02 | 1 |
| Cellular Movement                                                                                                                                                     | invasion of enterocytes                                         | 1,34E-02 | 1 |
| Cancer, Endocrine System Disorders, Organismal Injury and Abnormalities, Tumor Morphology                                                                             | invasion of papillary thyroid carcinoma                         | 1,34E-02 | 1 |
| Developmental Disorder, Hereditary Disorder, Ophthalmic Disease, Organismal Injury and Abnormalities                                                                  | iridogoniodysgenesis syndrome type 2                            | 1,34E-02 | 1 |
| Hereditary Disorder, Immunological Disease, Organismal Injury and Abnormalities                                                                                       | isolated immunodeficiency                                       | 1,34E-02 | 1 |
| Developmental Disorder, Hereditary Disorder, Neurological Disease, Organismal Injury and Abnormalities, Renal and Urological Disease, Skeletal and Muscular Disorders | joubert syndrome type 9                                         | 1,34E-02 | 1 |
| Endocrine System Disorders, Gastrointestinal Disease, Immunological Disease, Metabolic Disease                                                                        | ketosis-prone diabetes mellitus                                 | 1,34E-02 | 1 |
| Cardiovascular System Development and Function, Organ Morphology, Organismal Development, Tissue Morphology                                                           | lack of coronary sinus                                          | 1,34E-02 | 1 |
| Development, Skeletal and Muscular System Development and Function, Tissue Development                                                                                | lack of metacarpal bone                                         | 1,34E-02 | 1 |
| Nervous System Development and Function                                                                                                                               | lateralization                                                  | 1,34E-02 | 1 |
| Organismal Injury and Abnormalities                                                                                                                                   | leakage of interstitial fluid                                   | 1,34E-02 | 1 |
| Cell Morphology                                                                                                                                                       | length of apical membrane                                       | 1,34E-02 | 1 |
| Cell Morphology                                                                                                                                                       | length of basal membrane                                        | 1,34E-02 | 1 |
| Lipid Metabolism, Small Molecule Biochemistry                                                                                                                         | loss of arachidonic acid                                        | 1,34E-02 | 1 |
| Cellular Compromise                                                                                                                                                   | loss of lateral plasma membrane                                 | 1,34E-02 | 1 |
| Cancer, Organismal Injury and Abnormalities, Reproductive System Disease                                                                                              | malignant breast cancer                                         | 1,34E-02 | 1 |
| Cellular Development                                                                                                                                                  | maturation of myeloma cell lines                                | 1,34E-02 | 1 |
| Endocrine System Disorders, Gastrointestinal Disease, Hereditary Disorder, Metabolic Disease, Organismal Injury and Abnormalities                                     | maturity-onset diabetes of the young type 9                     | 1,34E-02 | 1 |
| Cancer, Endocrine System Disorders, Organismal Injury and Abnormalities                                                                                               | metastasis of papillary thyroid carcinoma                       | 1,34E-02 | 1 |
| Cancer, Organismal Injury and Abnormalities, Reproductive System Disease                                                                                              | metastatic hydatidiform mole                                    | 1,34E-02 | 1 |
| Cancer, Organismal Injury and Abnormalities, Reproductive System Disease                                                                                              | mixed ductal lobular breast carcinoma in situ                   | 1,34E-02 | 1 |
| Cell Morphology, Cellular Development, Cellular Growth and Proliferation                                                                                              | morphogenesis of hepatoma cell lines                            | 1,34E-02 | 1 |
| Cardiovascular System Development and Function, Organismal Development                                                                                                | morphogenesis of superior vena cava                             | 1,34E-02 | 1 |
| Cell Morphology, Cellular Assembly and Organization, DNA Replication, Recombination, and Repair                                                                       | morphology of nuclear matrix                                    | 1,34E-02 | 1 |
| Metabolic Disease                                                                                                                                                     | multiple mitochondrial dysfunctions syndrome type 2             | 1,34E-02 | 1 |
| Hereditary Disorder, Organismal Injury and Abnormalities, Renal and Urological Disease                                                                                | nephrotic syndrome type 9                                       | 1,34E-02 | 1 |
| Developmental Disorder, Hereditary Disorder, Metabolic Disease, Neurological Disease, Organismal Injury and Abnormalities                                             | neuronal ceroid lipofuscinosis 8 northern epilepsy variant      | 1,34E-02 | 1 |
| Developmental Disorder, Hereditary Disorder, Metabolic Disease, Neurological Disease, Organismal Injury and Abnormalities                                             | neuronal ceroid lipofuscinosis-8                                | 1,34E-02 | 1 |
| Cellular Function and Maintenance, Reproductive System Development and Function                                                                                       | organization of gonadal cell lines                              | 1,34E-02 | 1 |
| Hematological System Development and Function, Tissue Morphology                                                                                                      | oxidation of blood                                              | 1,34E-02 | 1 |
| Cellular Compromise, Skeletal and Muscular Disorders                                                                                                                  | oxidative stress response of adductor muscle                    | 1,34E-02 | 1 |
| Cardiovascular Disease, Developmental Disorder, Organismal Injury and Abnormalities                                                                                   | partial atrioventricular septal defect with heterotaxy syndrome | 1,34E-02 | 1 |
| Embryonic Development, Organismal Development, Tissue Development                                                                                                     | patterning of sinus venosus                                     | 1,34E-02 | 1 |
| Cellular Function and Maintenance                                                                                                                                     | persistence of Schwann cells                                    | 1,34E-02 | 1 |
| Small Molecule Biochemistry                                                                                                                                           | phosphorylation of phytosphingosine                             | 1,34E-02 | 1 |

|                                                                                                                                                                   |                                                           |          |   |
|-------------------------------------------------------------------------------------------------------------------------------------------------------------------|-----------------------------------------------------------|----------|---|
| Dermatological Diseases and Conditions, Hereditary Disorder, Organismal Injury and Abnormalities                                                                  | poikiloderma with neutropenia                             | 1,34E-02 | 1 |
| Cell Cycle                                                                                                                                                        | polyploidization of epithelial cell lines                 | 1,34E-02 | 1 |
| Cell Cycle                                                                                                                                                        | polyploidization of kidney cell lines                     | 1,34E-02 | 1 |
| Cancer, Dermatological Diseases and Conditions, Organismal Injury and Abnormalities                                                                               | poorly differentiated skin squamous cell carcinoma        | 1,34E-02 | 1 |
| Cellular Function and Maintenance, Cellular Growth and Proliferation, Hematological System Development and Function, Humoral Immune Response                      | production of germinal center B lymphocytes               | 1,34E-02 | 1 |
| Cellular Function and Maintenance                                                                                                                                 | progression of myoblasts                                  | 1,34E-02 | 1 |
| Neurological Disease                                                                                                                                              | progressive early-onset ataxia                            | 1,34E-02 | 1 |
| Cancer, Dermatological Diseases and Conditions, Organismal Injury and Abnormalities                                                                               | progressive epidermal hyperplasia                         | 1,34E-02 | 1 |
| Tissue Morphology                                                                                                                                                 | quantity of Brucella abortus                              | 1,34E-02 | 1 |
| Cellular Development, Cellular Growth and Proliferation, Embryonic Development, Organismal Development, Tissue Morphology                                         | quantity of embryoid body cells                           | 1,34E-02 | 1 |
| Organ Morphology, Renal and Urological System Development and Function                                                                                            | quantity of mesangial matrix                              | 1,34E-02 | 1 |
| Cell Morphology, Nervous System Development and Function, Skeletal and Muscular System Development and Function                                                   | re-innervation of skeletal muscle                         | 1,34E-02 | 1 |
| Carbohydrate Metabolism                                                                                                                                           | recognition of heparan sulfate                            | 1,34E-02 | 1 |
| Carbohydrate Metabolism                                                                                                                                           | recognition of hyaluronic acid                            | 1,34E-02 | 1 |
| Lipid Metabolism, Small Molecule Biochemistry                                                                                                                     | recognition of paclitaxel                                 | 1,34E-02 | 1 |
| Cell-To-Cell Signaling and Interaction, Cell-mediated Immune Response, Cellular Movement, Hematological System Development and Function, Immune Cell Trafficking  | recruitment of activated T lymphocyte                     | 1,34E-02 | 1 |
| System Disease, Hereditary Disorder, Infectious Diseases, Neurological Disease, Organismal Injury and Abnormalities                                               | hepatic dysfunction, and cardiovascular malformations     | 1,34E-02 | 1 |
| Hereditary Disorder, Infectious Diseases, Organismal Injury and Abnormalities                                                                                     | recurrent isolated invasive pneumococcal disease type 2   | 1,34E-02 | 1 |
| Organ Morphology, Tissue Development                                                                                                                              | regeneration of adductor muscle                           | 1,34E-02 | 1 |
| Cellular Function and Maintenance                                                                                                                                 | regulation of enterocytes                                 | 1,34E-02 | 1 |
| Cell Signaling, Small Molecule Biochemistry                                                                                                                       | regulation of nitric oxide                                | 1,34E-02 | 1 |
| Cellular Function and Maintenance, Cellular Movement                                                                                                              | relocalization of stromal cells                           | 1,34E-02 | 1 |
| Tissue Morphology                                                                                                                                                 | remodeling of left common carotid artery                  | 1,34E-02 | 1 |
| Infectious Diseases                                                                                                                                               | replication of Human rhinovirus 1B                        | 1,34E-02 | 1 |
| Respiratory System Development and Function, Tissue Development                                                                                                   | response of bronchial tissue                              | 1,34E-02 | 1 |
| Cellular Assembly and Organization                                                                                                                                | restoration of actin cytoskeleton                         | 1,34E-02 | 1 |
| Function and Maintenance, Cellular Movement, Hematological System Development and Function, Immune Cell Trafficking                                               | retention of regulatory T lymphocytes                     | 1,34E-02 | 1 |
| Connective Tissue Disorders, Developmental Disorder, Hereditary Disorder, Metabolic Disease, Organismal Injury and Abnormalities, Skeletal and Muscular Disorders | rhizomelic chondrodysplasia punctata type 2               | 1,34E-02 | 1 |
| Ophthalmic Disease, Organismal Injury and Abnormalities                                                                                                           | ring dermoid of cornea                                    | 1,34E-02 | 1 |
| Hematological Disease, Infectious Diseases                                                                                                                        | severe malaria                                            | 1,34E-02 | 1 |
| Cell Morphology, Skeletal and Muscular System Development and Function                                                                                            | shape of muscle cell lines                                | 1,34E-02 | 1 |
| Hereditary Disorder, Neurological Disease, Organismal Injury and Abnormalities                                                                                    | spinocerebellar ataxia type 10                            | 1,34E-02 | 1 |
| Connective Tissue Disorders, Developmental Disorder, Hereditary Disorder, Organismal Injury and Abnormalities, Skeletal and Muscular Disorders                    | spondyloepimetaphyseal dysplasia with joint laxity type 2 | 1,34E-02 | 1 |
| System Development and Function, Hypersensitivity Response, Inflammatory Response                                                                                 | stimulation of BMSC cells                                 | 1,34E-02 | 1 |
| Cardiovascular Disease, Cellular Compromise, Organ Morphology, Organismal Injury and Abnormalities                                                                | stress response of ventricular septum                     | 1,34E-02 | 1 |
| Cancer, Dermatological Diseases and Conditions, Organismal Injury and Abnormalities                                                                               | susceptibility to cutaneous malignant melanoma type 10    | 1,34E-02 | 1 |

|                                                                                                                                                                                                |                                                           |          |    |
|------------------------------------------------------------------------------------------------------------------------------------------------------------------------------------------------|-----------------------------------------------------------|----------|----|
| Cancer, Gastrointestinal Disease, Organismal Injury and Abnormalities<br>Inflammatory Disease, Inflammatory Response, Organismal Injury and Abnormalities,<br>Renal and Urological Disease     | susceptibility to sporadic colorectal cancer              | 1,34E-02 | 1  |
|                                                                                                                                                                                                | swelling of renal glomerulus                              | 1,34E-02 | 1  |
| Cardiovascular Disease, Organismal Injury and Abnormalities                                                                                                                                    | tachycardia of atrium                                     | 1,34E-02 | 1  |
| Organ Morphology, Tissue Morphology                                                                                                                                                            | thickness of glomerular basement membrane                 | 1,34E-02 | 1  |
| Cancer, Endocrine System Disorders, Organismal Injury and Abnormalities<br>Hereditary Disorder, Immunological Disease, Organismal Injury and Abnormalities,<br>Skeletal and Muscular Disorders | thyroid gland fetal adenoma                               | 1,34E-02 | 1  |
|                                                                                                                                                                                                | trichohepatoenteric syndrome type 2                       | 1,34E-02 | 1  |
| Lipid Metabolism, Small Molecule Biochemistry                                                                                                                                                  | turnover of arachidonic acid                              | 1,34E-02 | 1  |
| Developmental Disorder                                                                                                                                                                         | ulnar-mammary syndrome                                    | 1,34E-02 | 1  |
| DNA Replication, Recombination, and Repair                                                                                                                                                     | unwinding of origin of replication in the short<br>region | 1,34E-02 | 1  |
| Infectious Diseases                                                                                                                                                                            | uptake of Human adenovirus 35                             | 1,34E-02 | 1  |
| Lipid Metabolism, Molecular Transport, Small Molecule Biochemistry                                                                                                                             | uptake of omega-(4-iodophenyl)pentadecanoic<br>acid       | 1,34E-02 | 1  |
| Cardiovascular System Development and Function, Organ Morphology<br>Developmental Disorder, Hereditary Disorder, Neurological Disease, Organismal Injury<br>and Abnormalities                  | volume of right ventricle                                 | 1,34E-02 | 1  |
|                                                                                                                                                                                                | x-linked mental retardation type 90                       | 1,34E-02 | 1  |
| Cellular Function and Maintenance, Hematological System Development and Function<br>Hematological System Development and Function, Inflammatory Response, Tissue<br>Morphology                 | function of myeloid cells                                 | 1,38E-02 | 9  |
|                                                                                                                                                                                                | quantity of macrophages                                   | 1,38E-02 | 8  |
| Cancer, Organismal Injury and Abnormalities                                                                                                                                                    | metastatic carcinoma                                      | 1,39E-02 | 7  |
| Organ Morphology, Reproductive System Development and Function                                                                                                                                 | abnormal morphology of seminiferous tubule                | 1,39E-02 | 6  |
| Cell-To-Cell Signaling and Interaction                                                                                                                                                         | response of granulocytes                                  | 1,41E-02 | 5  |
| Molecular Transport                                                                                                                                                                            | transport of transition metal ion                         | 1,42E-02 | 3  |
| Cell Death and Survival, Gastrointestinal Disease, Hepatic System Disease, Organismal<br>Injury and Abnormalities                                                                              | apoptosis of hepatocytes                                  | 1,44E-02 | 6  |
| Embryonic Development, Organ Development, Organ Morphology, Organismal<br>Development, Tissue Development, Visual System Development and Function                                              | abnormal morphology of anterior chamber of eye            | 1,46E-02 | 2  |
| Lipid Metabolism, Molecular Transport, Small Molecule Biochemistry                                                                                                                             | abnormal quantity of bile salt                            | 1,46E-02 | 2  |
| Cell Death and Survival                                                                                                                                                                        | apoptosis of airway epithelial cells                      | 1,46E-02 | 2  |
| Infectious Diseases                                                                                                                                                                            | infection by respiratory syncytial virus                  | 1,46E-02 | 2  |
| Cell Cycle                                                                                                                                                                                     | metaphase/anaphase transition                             | 1,46E-02 | 2  |
| Cellular Development, Cellular Growth and Proliferation, Organ Development, Skeletal<br>and Muscular System Development and Function, Tissue Development                                       | proliferation of skeletal muscle satellite cells          | 1,46E-02 | 2  |
| Cellular Assembly and Organization, Cellular Function and Maintenance<br>Cell Death and Survival, Organismal Injury and Abnormalities, Renal and Urological<br>Disease                         | organization of actin filaments                           | 1,51E-02 | 5  |
|                                                                                                                                                                                                | apoptosis of tubular cells                                | 1,52E-02 | 3  |
| Cellular Compromise, Hypersensitivity Response, Inflammatory Response                                                                                                                          | degranulation of mast cells                               | 1,57E-02 | 6  |
| Cellular Function and Maintenance                                                                                                                                                              | function of antigen presenting cells                      | 1,59E-02 | 9  |
| Molecular Transport                                                                                                                                                                            | transport of heavy metal                                  | 1,62E-02 | 6  |
| Cell Death and Survival                                                                                                                                                                        | necrosis of epithelial tissue                             | 1,63E-02 | 18 |
| Molecular Transport                                                                                                                                                                            | release of metal ion                                      | 1,66E-02 | 8  |
| Cell Morphology, Cellular Assembly and Organization, DNA Replication,<br>Recombination, and Repair                                                                                             | abnormal morphology of mitotic spindle                    | 1,67E-02 | 2  |
| Cancer, Organismal Injury and Abnormalities, Respiratory Disease                                                                                                                               | development of lung tumor                                 | 1,67E-02 | 2  |
| Cellular Function and Maintenance, Molecular Transport                                                                                                                                         | efflux of anion                                           | 1,67E-02 | 2  |

|                                                                                                                                                        |                                                           |          |     |
|--------------------------------------------------------------------------------------------------------------------------------------------------------|-----------------------------------------------------------|----------|-----|
| Organismal Functions, Tissue Morphology                                                                                                                | healing of epithelial tissue                              | 1,67E-02 | 2   |
| Cell-To-Cell Signaling and Interaction, Cellular Function and Maintenance, Hematological System Development and Function, Inflammatory Response        | phagocytosis by microglia                                 | 1,67E-02 | 2   |
| Behavior                                                                                                                                               | taste discrimination                                      | 1,67E-02 | 2   |
| Cell Death and Survival                                                                                                                                | apoptosis of macrophages                                  | 1,69E-02 | 5   |
| Cell Death and Survival                                                                                                                                | apoptosis of splenocytes                                  | 1,74E-02 | 3   |
| Gene Expression                                                                                                                                        | synthesis of RNA                                          | 1,74E-02 | 3   |
| Cardiovascular Disease                                                                                                                                 | peripheral arterial disease                               | 1,78E-02 | 8   |
| Cancer, Organismal Injury and Abnormalities                                                                                                            | thoracic neoplasm                                         | 1,79E-02 | 38  |
| Organ Morphology, Organismal Development, Renal and Urological System Development and Function                                                         | abnormal morphology of renal tubule                       | 1,81E-02 | 5   |
| Embryonic Development, Tissue Morphology                                                                                                               | abnormal morphology of yolk sac                           | 1,81E-02 | 5   |
| Cancer, Organismal Injury and Abnormalities                                                                                                            | epithelial cancer                                         | 1,82E-02 | 219 |
| Molecular Transport                                                                                                                                    | secretion of molecule                                     | 1,85E-02 | 17  |
| Organ Morphology, Organismal Development, Renal and Urological System Development and Function                                                         | abnormal morphology of proximal convoluted tubule         | 1,86E-02 | 3   |
| Cellular Movement                                                                                                                                      | migration of prostate cancer cell lines                   | 1,87E-02 | 5   |
| Cell Morphology, Nervous System Development and Function                                                                                               | morphology of central nervous system cells                | 1,87E-02 | 6   |
| Gastrointestinal Disease, Hepatic System Disease, Organismal Injury and Abnormalities                                                                  | liver lesion                                              | 1,89E-02 | 107 |
| Organ Morphology, Organismal Development, Renal and Urological System Development and Function                                                         | abnormal morphology of dilated proximal convoluted tubule | 1,89E-02 | 2   |
| Cardiovascular System Development and Function                                                                                                         | abnormal morphology of vascular plexus                    | 1,89E-02 | 2   |
| Cell-To-Cell Signaling and Interaction, Hematological System Development and Function, Immune Cell Trafficking, Inflammatory Response                  | activation of monocyte-derived dendritic cells            | 1,89E-02 | 2   |
| Tissue Development                                                                                                                                     | formation of lumen                                        | 1,89E-02 | 2   |
| Cellular Assembly and Organization                                                                                                                     | formation of micronuclei                                  | 1,89E-02 | 2   |
| Cell Morphology, Hematological System Development and Function, Hematopoiesis, Lymphoid Tissue Structure and Development, Tissue Morphology            | lack of bone marrow cells                                 | 1,89E-02 | 2   |
| Cellular Assembly and Organization, Cellular Function and Maintenance                                                                                  | quantity of lamellipodia                                  | 1,89E-02 | 2   |
| Infectious Diseases                                                                                                                                    | replication of Enterovirus                                | 1,89E-02 | 2   |
| Cell-To-Cell Signaling and Interaction                                                                                                                 | response of endothelial cells                             | 1,89E-02 | 2   |
| Cell Signaling, Molecular Transport, Small Molecule Biochemistry                                                                                       | secretion of nitric oxide                                 | 1,89E-02 | 2   |
| Lipid Metabolism, Small Molecule Biochemistry, Vitamin and Mineral Metabolism                                                                          | steroidogenesis of cells                                  | 1,89E-02 | 2   |
| Cellular Movement, Reproductive System Development and Function                                                                                        | migration of breast cell lines                            | 1,90E-02 | 4   |
| Cellular Assembly and Organization, Cellular Function and Maintenance                                                                                  | organization of mitochondria                              | 1,90E-02 | 4   |
| Cell Morphology, Hematological System Development and Function                                                                                         | morphology of myeloid cells                               | 1,93E-02 | 6   |
| Cell Death and Survival, Skeletal and Muscular Disorders                                                                                               | apoptosis of smooth muscle cells                          | 1,93E-02 | 5   |
| Drug Metabolism, Lipid Metabolism, Molecular Transport, Small Molecule Biochemistry                                                                    | release of prostaglandin E2                               | 1,98E-02 | 3   |
| Development and Function, Hepatic System Disease, Inflammatory Disease, Inflammatory Response, Metabolic Disease, Organ Development, Organismal Injury | steatohepatitis                                           | 1,98E-02 | 3   |
| Cell Cycle                                                                                                                                             | G2/M phase                                                | 1,98E-02 | 8   |
| Cancer, Organismal Injury and Abnormalities                                                                                                            | neoplasia of epithelial tissue                            | 1,98E-02 | 220 |

**Carcinoma mice vs. non-carcinoma mice: All mice included with no ComBat normalization**

| Categories                                                                                                                                   | Diseases or Functions Annotation                | p-Value  | # Molecules |
|----------------------------------------------------------------------------------------------------------------------------------------------|-------------------------------------------------|----------|-------------|
| Cancer, Organismal Injury and Abnormalities                                                                                                  | cancer                                          | 8,50E-09 | 251         |
| Cancer, Organismal Injury and Abnormalities                                                                                                  | malignant solid tumor                           | 1,27E-08 | 248         |
| Cancer, Organismal Injury and Abnormalities                                                                                                  | neoplasia of epithelial tissue                  | 1,65E-08 | 237         |
| Cancer, Organismal Injury and Abnormalities                                                                                                  | epithelial cancer                               | 1,91E-08 | 236         |
| Cancer, Organismal Injury and Abnormalities                                                                                                  | tumorigenesis of tissue                         | 2,25E-08 | 239         |
| Cancer, Gastrointestinal Disease, Organismal Injury and Abnormalities                                                                        | digestive organ tumor                           | 4,79E-07 | 219         |
| Cancer, Organismal Injury and Abnormalities                                                                                                  | abdominal cancer                                | 7,10E-07 | 228         |
| Cancer, Gastrointestinal Disease, Organismal Injury and Abnormalities                                                                        | digestive system cancer                         | 8,41E-07 | 217         |
| Cancer, Organismal Injury and Abnormalities                                                                                                  | abdominal neoplasm                              | 8,87E-07 | 229         |
| Cancer, Organismal Injury and Abnormalities                                                                                                  | adenocarcinoma                                  | 9,34E-06 | 208         |
| Cell Cycle, Cellular Assembly and Organization, DNA Replication, Recombination, and Repair                                                   | segregation of chromosomes                      | 1,03E-05 | 10          |
| Cell Death and Survival                                                                                                                      | apoptosis of fibroblasts                        | 5,44E-05 | 13          |
| Cell Cycle                                                                                                                                   | cell cycle progression                          | 7,22E-05 | 37          |
| Cellular Assembly and Organization, DNA Replication, Recombination, and Repair                                                               | quantity of mitotic spindle                     | 7,80E-05 | 4           |
| Cell Death and Survival                                                                                                                      | apoptosis of cervical cancer cell lines         | 1,10E-04 | 15          |
| Cancer, Gastrointestinal Disease, Organismal Injury and Abnormalities                                                                        | gastrointestinal tract cancer                   | 1,23E-04 | 185         |
| Cancer, Gastrointestinal Disease, Organismal Injury and Abnormalities                                                                        | Gastrointestinal Tract Cancer and Tumors        | 1,30E-04 | 186         |
| Cell Death and Survival                                                                                                                      | cell death of cervical cancer cell lines        | 1,48E-04 | 17          |
| Cell Death and Survival                                                                                                                      | apoptosis of tumor cell lines                   | 1,49E-04 | 42          |
| Nervous System Development and Function, Neurological Disease, Organ Morphology, Organismal Development, Organismal Injury and Abnormalities | abnormal morphology of optic tract              | 1,51E-04 | 3           |
| Cell Signaling                                                                                                                               | integration of HIV-1                            | 1,51E-04 | 3           |
| Cell Death and Survival, Cellular Function and Maintenance                                                                                   | colony survival of pancreatic cancer cell lines | 1,54E-04 | 2           |
| Cancer, Endocrine System Disorders, Gastrointestinal Disease, Organismal Injury and Abnormalities                                            | early-onset pancreatic cancer                   | 1,54E-04 | 2           |
| Cell Death and Survival                                                                                                                      | killing of skin cell lines                      | 1,54E-04 | 2           |
| Cell Morphology, Cellular Assembly and Organization                                                                                          | reorientation of actin cytoskeleton             | 1,54E-04 | 2           |
| Cell Death and Survival                                                                                                                      | apoptosis of connective tissue cells            | 1,80E-04 | 15          |
| Cell Death and Survival                                                                                                                      | cell death of connective tissue cells           | 2,34E-04 | 24          |
| Organismal Development                                                                                                                       | morphology of body cavity                       | 3,01E-04 | 44          |
| Developmental Disorder, Embryonic Development, Organismal Survival                                                                           | death of embryo                                 | 3,12E-04 | 9           |
| Cell Morphology                                                                                                                              | elongation of cells                             | 3,18E-04 | 6           |
| Cancer, Gastrointestinal Disease, Organismal Injury and Abnormalities                                                                        | large intestine neoplasm                        | 3,22E-04 | 177         |
| Cancer, Organismal Injury and Abnormalities                                                                                                  | breast or colorectal cancer                     | 3,41E-04 | 145         |
| Cell Morphology, Cellular Assembly and Organization                                                                                          | morphology of cytoskeleton                      | 3,55E-04 | 8           |
| Cell Cycle                                                                                                                                   | mitosis                                         | 3,73E-04 | 20          |

|                                                                                                                                              |                                                         |          |     |
|----------------------------------------------------------------------------------------------------------------------------------------------|---------------------------------------------------------|----------|-----|
| Cancer, Gastrointestinal Disease, Organismal Injury and Abnormalities                                                                        | malignant neoplasm of large intestine                   | 3,76E-04 | 176 |
| Cellular Assembly and Organization, DNA Replication, Recombination, and Repair                                                               | alignment of chromosomes                                | 3,77E-04 | 4   |
| Cellular Assembly and Organization, DNA Replication, Recombination, and Repair                                                               | chromosomal congression of chromosomes                  | 3,84E-04 | 3   |
| Cell Cycle, DNA Replication, Recombination, and Repair                                                                                       | checkpoint control                                      | 4,29E-04 | 7   |
| Cell Cycle, Connective Tissue Development and Function                                                                                       | aneuploidy of fibroblasts                               | 4,57E-04 | 2   |
| Cell Death and Survival                                                                                                                      | killing of epithelial cell lines                        | 4,57E-04 | 2   |
| Cellular Assembly and Organization, DNA Replication, Recombination, and Repair                                                               | quantity of chromosomes                                 | 4,95E-04 | 4   |
| Cell Death and Survival                                                                                                                      | cell death of tumor cell lines                          | 5,42E-04 | 48  |
| Cellular Assembly and Organization                                                                                                           | missegregation of chromosomes                           | 6,37E-04 | 4   |
| Cell Cycle                                                                                                                                   | arrest in mitosis of cervical cancer cell lines         | 7,64E-04 | 5   |
| Cell Signaling                                                                                                                               | I-kappaB kinase/NF-kappaB cascade                       | 7,74E-04 | 9   |
| Cell-To-Cell Signaling and Interaction                                                                                                       | aggregation of bone cancer cell lines                   | 9,07E-04 | 2   |
| Cell-To-Cell Signaling and Interaction                                                                                                       | aggregation of sarcoma cell lines                       | 9,07E-04 | 2   |
| Cellular Assembly and Organization                                                                                                           | binding of chromosomes                                  | 9,07E-04 | 2   |
| Cardiovascular System Development and Function, Cell Cycle, Cell-To-Cell Signaling and Interaction, Cellular Growth and Proliferation        | contact growth inhibition of vascular endothelial cells | 9,07E-04 | 2   |
| Cellular Movement                                                                                                                            | migration of enterocytes                                | 9,07E-04 | 2   |
| Cellular Movement                                                                                                                            | migration of squamous carcinoma cells                   | 9,07E-04 | 2   |
| Cellular Development, Cellular Growth and Proliferation, Embryonic Development, Organismal Development, Tissue Morphology                    | quantity of mesodermal cells                            | 9,07E-04 | 2   |
| Cellular Assembly and Organization                                                                                                           | trafficking of secretory vesicles                       | 9,07E-04 | 2   |
| Cellular Movement                                                                                                                            | migration of prostate cancer cell lines                 | 9,26E-04 | 7   |
| Digestive System Development and Function, Hepatic System Development and Function, Organ Morphology                                         | regeneration of liver                                   | 9,60E-04 | 6   |
| Cancer, Gastrointestinal Disease, Hepatic System Disease, Organismal Injury and Abnormalities                                                | liver carcinoma                                         | 9,77E-04 | 103 |
| Cell Morphology, Cellular Assembly and Organization, DNA Replication, Recombination, and Repair                                              | morphology of mitotic spindle                           | 1,00E-03 | 4   |
| Organismal Development                                                                                                                       | abnormal morphology of body cavity                      | 1,13E-03 | 36  |
| Cell Morphology, Cellular Assembly and Organization                                                                                          | length of filaments                                     | 1,13E-03 | 3   |
| Cellular Assembly and Organization, Cellular Function and Maintenance                                                                        | quantity of lamellipodia                                | 1,13E-03 | 3   |
| Cell Death and Survival                                                                                                                      | cell death of fibroblast cell lines                     | 1,19E-03 | 17  |
| Cancer, Organismal Injury and Abnormalities                                                                                                  | abdominal adenocarcinoma                                | 1,21E-03 | 157 |
| Organismal Survival                                                                                                                          | organismal death                                        | 1,29E-03 | 65  |
| Cancer, Hematological Disease, Immunological Disease, Organismal Injury and Abnormalities                                                    | Waldenstrom's macroglobulinemia                         | 1,44E-03 | 9   |
| Cancer, Gastrointestinal Disease, Hepatic System Disease, Organismal Injury and Abnormalities                                                | hepatobiliary system cancer                             | 1,44E-03 | 107 |
| Cellular Assembly and Organization                                                                                                           | organization of organelle                               | 1,45E-03 | 20  |
| Cancer, Gastrointestinal Disease, Hepatic System Disease, Organismal Injury and Abnormalities                                                | liver cancer                                            | 1,47E-03 | 105 |
| Nervous System Development and Function, Neurological Disease, Organ Morphology, Organismal Development, Organismal Injury and Abnormalities | abnormal morphology of optic chiasm                     | 1,50E-03 | 2   |
| Hematological System Development and Function, Hematopoiesis, Tissue Development                                                             | accumulation of red blood cells                         | 1,50E-03 | 2   |
| Cell Cycle                                                                                                                                   | arrest in G2 phase of hematopoietic progenitor cells    | 1,50E-03 | 2   |

|                                                                                                                                                                          |                                                          |          |     |
|--------------------------------------------------------------------------------------------------------------------------------------------------------------------------|----------------------------------------------------------|----------|-----|
| Cancer, Hematological Disease, Immunological Disease, Organismal Injury and Abnormalities                                                                                | latency of lymphoma                                      | 1,50E-03 | 2   |
| Cancer, Organismal Injury and Abnormalities                                                                                                                              | thoracic cancer                                          | 1,59E-03 | 50  |
| Cell Morphology, Cellular Assembly and Organization, Cellular Function and Maintenance                                                                                   | reorganization of actin filaments                        | 1,64E-03 | 4   |
| Cancer, Organismal Injury and Abnormalities                                                                                                                              | abdominal carcinoma                                      | 1,70E-03 | 158 |
| Cancer, Organismal Injury and Abnormalities, Respiratory Disease                                                                                                         | carcinoma in lung                                        | 1,83E-03 | 46  |
| Cell-To-Cell Signaling and Interaction, Cellular Function and Maintenance, Hematological System Development and Function, Inflammatory Response                          | phagocytosis of leukocyte cell lines                     | 1,85E-03 | 3   |
| Organismal Development, Organismal Injury and Abnormalities                                                                                                              | abnormal morphology of thoracic cavity                   | 2,02E-03 | 20  |
| Cancer, Organismal Injury and Abnormalities                                                                                                                              | thoracic neoplasm                                        | 2,09E-03 | 51  |
| Gastrointestinal Disease, Hepatic System Disease, Organismal Injury and Abnormalities                                                                                    | liver lesion                                             | 2,12E-03 | 109 |
| Cell Morphology, Hematological System Development and Function, Hematopoiesis, Lymphoid Tissue Structure and Development, Tissue Morphology                              | morphology of megakaryocytes                             | 2,14E-03 | 3   |
| Hematological System Development and Function, Hematopoiesis, Lymphoid Tissue Structure and Development, Tissue Morphology                                               | quantity of myeloid progenitor cells                     | 2,14E-03 | 4   |
| Cell Cycle                                                                                                                                                               | formation of mitotic spindle                             | 2,15E-03 | 5   |
| Cell-To-Cell Signaling and Interaction                                                                                                                                   | adhesion of kidney cancer cell lines                     | 2,23E-03 | 2   |
| Cancer, Hereditary Disorder, Organismal Injury and Abnormalities                                                                                                         | autosomal dominant cancer                                | 2,23E-03 | 2   |
| Connective Tissue Disorders, Dermatological Diseases and Conditions, Developmental Disorder, Hereditary Disorder, Metabolic Disease, Organismal Injury and Abnormalities | autosomal recessive cutis laxa                           | 2,23E-03 | 2   |
| Infectious Diseases                                                                                                                                                      | infection by vaccinia virus                              | 2,23E-03 | 2   |
| Cellular Development, Cellular Growth and Proliferation                                                                                                                  | expansion of tumor cell lines                            | 2,45E-03 | 3   |
| Cellular Function and Maintenance, Hematological System Development and Function, Nervous System Development and Function                                                | function of microglia                                    | 2,45E-03 | 3   |
| Cellular Assembly and Organization, Cellular Function and Maintenance                                                                                                    | endocytosis of vesicles                                  | 2,52E-03 | 4   |
| Cancer, Gastrointestinal Disease, Hepatic System Disease, Organismal Injury and Abnormalities                                                                            | growth of hepatocellular carcinoma                       | 2,79E-03 | 3   |
| Cancer, Organismal Injury and Abnormalities                                                                                                                              | poorly differentiated malignant tumor                    | 2,79E-03 | 3   |
| Digestive System Development and Function, Hepatic System Development and Function, Organ Development                                                                    | function of liver                                        | 2,90E-03 | 6   |
| Cell Death and Survival                                                                                                                                                  | necrosis                                                 | 3,03E-03 | 70  |
| Cell Cycle                                                                                                                                                               | arrest in G2 phase of lymphatic system cells             | 3,10E-03 | 2   |
| Cellular Development, Digestive System Development and Function                                                                                                          | differentiation of enterocytes                           | 3,10E-03 | 2   |
| Cell Morphology, Cellular Assembly and Organization, Cellular Function and Maintenance                                                                                   | length of microtubules                                   | 3,10E-03 | 2   |
| Cell Cycle, Cell Morphology, Cellular Assembly and Organization, DNA Replication, Recombination, and Repair                                                              | length of mitotic spindle                                | 3,10E-03 | 2   |
| Cellular Movement, Hematological System Development and Function, Immune Cell Trafficking, Inflammatory Response                                                         | sequestration of neutrophils                             | 3,10E-03 | 2   |
| Cellular Movement                                                                                                                                                        | transendothelial migration of prostate cancer cell lines | 3,10E-03 | 2   |
| Cancer, Organismal Injury and Abnormalities, Renal and Urological Disease                                                                                                | tumorigenesis of urinary tract tumor                     | 3,10E-03 | 2   |
| Developmental Disorder, Endocrine System Disorders, Hereditary Disorder, Organismal Injury and Abnormalities, Reproductive System Disease                                | globozoospermia                                          | 3,16E-03 | 3   |
| Cellular Function and Maintenance, Nervous System Development and Function                                                                                               | function of neuroglia                                    | 3,18E-03 | 4   |
| Cellular Assembly and Organization, Cellular Function and Maintenance                                                                                                    | organization of actin filaments                          | 3,45E-03 | 6   |
| Cancer, Organismal Injury and Abnormalities, Respiratory Disease                                                                                                         | lung cancer                                              | 3,64E-03 | 48  |
| Skeletal and Muscular Disorders, Skeletal and Muscular System Development and Function                                                                                   | abnormal morphology of muscle                            | 3,69E-03 | 12  |
| Cell Death and Survival                                                                                                                                                  | apoptosis                                                | 3,76E-03 | 69  |



|                                                                                                                                                       |                                                    |          |     |
|-------------------------------------------------------------------------------------------------------------------------------------------------------|----------------------------------------------------|----------|-----|
| Organismal Development                                                                                                                                | growth of organism                                 | 3,82E-03 | 27  |
| Cell-To-Cell Signaling and Interaction                                                                                                                | response of tumor cell lines                       | 3,99E-03 | 8   |
| Cell-To-Cell Signaling and Interaction, Hair and Skin Development and Function                                                                        | adhesion of keratinocytes                          | 3,99E-03 | 3   |
| Developmental Disorder, Embryonic Development, Organismal Development, Tissue Morphology                                                              | abnormal morphology of atrioventricular canal      | 4,10E-03 | 2   |
| Cell Morphology, Cellular Development                                                                                                                 | branching of endothelial cell lines                | 4,10E-03 | 2   |
| Cellular Development, Skeletal and Muscular System Development and Function, Tissue Development                                                       | differentiation of skeletal muscle satellite cells | 4,10E-03 | 2   |
| Cell Morphology, Skeletal and Muscular System Development and Function                                                                                | elongation of muscle cells                         | 4,10E-03 | 2   |
| Gastrointestinal Disease, Infectious Diseases                                                                                                         | infection of gastrointestinal tract                | 4,10E-03 | 2   |
| Neurological Disease                                                                                                                                  | preclinical stage amyotrophic lateral sclerosis    | 4,10E-03 | 2   |
| Cell Morphology, Embryonic Development, Tissue Development                                                                                            | stratification of cells                            | 4,10E-03 | 2   |
| Cancer, Organismal Injury and Abnormalities                                                                                                           | growth of tumor                                    | 4,11E-03 | 26  |
| Cancer                                                                                                                                                | cell transformation                                | 4,15E-03 | 16  |
| Cell Death and Survival                                                                                                                               | apoptosis of intestinal cells                      | 4,23E-03 | 4   |
| Embryonic Development, Organismal Development, Tissue Morphology                                                                                      | size of embryo                                     | 4,27E-03 | 13  |
| Cancer, Organismal Injury and Abnormalities, Respiratory Disease                                                                                      | respiratory system tumor                           | 4,28E-03 | 50  |
| Cancer, Organismal Injury and Abnormalities, Respiratory Disease                                                                                      | lung tumor                                         | 4,36E-03 | 49  |
| Reproductive System Development and Function                                                                                                          | decidualization of uterus                          | 4,45E-03 | 3   |
| Cardiovascular System Development and Function, Tissue Morphology                                                                                     | diameter of blood vessel                           | 4,45E-03 | 3   |
| Cell Cycle, Cell Morphology, Cellular Assembly and Organization, DNA Replication, Recombination, and Repair                                           | morphology of chromosomes                          | 4,53E-03 | 4   |
| Cell Cycle, Reproductive System Development and Function                                                                                              | meiosis of germ cells                              | 4,58E-03 | 6   |
| Cancer, Gastrointestinal Disease, Organismal Injury and Abnormalities                                                                                 | gastrointestinal carcinoma                         | 4,60E-03 | 127 |
| Cardiovascular Disease, Cardiovascular System Development and Function, Organ Morphology, Organismal Development, Organismal Injury and Abnormalities | abnormal morphology of enlarged heart              | 4,60E-03 | 5   |
| Cell Morphology                                                                                                                                       | morphology of cells                                | 4,71E-03 | 55  |
| Cancer, Gastrointestinal Disease, Organismal Injury and Abnormalities                                                                                 | gastrointestinal adenocarcinoma                    | 4,89E-03 | 121 |
| Cell Cycle, Reproductive System Development and Function                                                                                              | meiosis of oocytes                                 | 4,94E-03 | 3   |
| Cardiovascular System Development and Function                                                                                                        | function of cardiovascular system                  | 4,94E-03 | 13  |
| Cell Cycle, DNA Replication, Recombination, and Repair                                                                                                | DNA replication checkpoint                         | 5,23E-03 | 2   |
| Cell Death and Survival, Organismal Injury and Abnormalities                                                                                          | apoptosis of colonocytes                           | 5,23E-03 | 2   |
| Cell-To-Cell Signaling and Interaction                                                                                                                | clustering of tumor cell lines                     | 5,23E-03 | 2   |
| Cell-To-Cell Signaling and Interaction, Cellular Assembly and Organization                                                                            | compaction of cells                                | 5,23E-03 | 2   |
| Cell Death and Survival                                                                                                                               | necroptosis of fibroblasts                         | 5,23E-03 | 2   |
| Cell-To-Cell Signaling and Interaction                                                                                                                | recognition of bacteria                            | 5,23E-03 | 2   |
| Carbohydrate Metabolism, Lipid Metabolism, Small Molecule Biochemistry                                                                                | hydrolysis of choline-phospholipid                 | 5,46E-03 | 3   |
| Cellular Development, Cellular Growth and Proliferation, Nervous System Development and Function                                                      | proliferation of astrocytes                        | 5,49E-03 | 4   |
| Connective Tissue Disorders, Hematological Disease, Organismal Injury and Abnormalities                                                               | thrombocytopenia                                   | 5,54E-03 | 9   |
| Hematological Disease                                                                                                                                 | cytopenia                                          | 5,78E-03 | 12  |

|                                                                                                                                   |                                               |          |     |
|-----------------------------------------------------------------------------------------------------------------------------------|-----------------------------------------------|----------|-----|
| Cancer, Gastrointestinal Disease, Organismal Injury and Abnormalities                                                             | colorectal cancer                             | 6,07E-03 | 124 |
| Cell Cycle                                                                                                                        | G2/M phase                                    | 6,25E-03 | 9   |
| Cell Death and Survival                                                                                                           | necrosis of prostate cancer cell lines        | 6,25E-03 | 9   |
| Cancer, Gastrointestinal Disease, Organismal Injury and Abnormalities                                                             | colorectal neoplasia                          | 6,32E-03 | 125 |
| Cellular Growth and Proliferation                                                                                                 | proliferation of cells                        | 6,37E-03 | 90  |
| Embryonic Development, Organismal Development, Tissue Development                                                                 | development of epiblast                       | 6,48E-03 | 2   |
| Tissue Development                                                                                                                | development of organoid                       | 6,48E-03 | 2   |
| Connective Tissue Disorders, Hereditary Disorder, Metabolic Disease, Organismal Injury and Abnormalities                          | familial partial lipodystrophy                | 6,48E-03 | 2   |
| Cell Signaling, Nucleic Acid Metabolism, Small Molecule Biochemistry                                                              | loading of GTP                                | 6,48E-03 | 2   |
| Embryonic Development, Tissue Development                                                                                         | patterning of epithelial tissue               | 6,48E-03 | 2   |
| Cell-To-Cell Signaling and Interaction, Cellular Function and Maintenance, Inflammatory Response                                  | phagocytosis by dendritic cells               | 6,48E-03 | 2   |
| Cardiovascular Disease, Organismal Injury and Abnormalities                                                                       | systolic heart failure                        | 6,48E-03 | 2   |
| Cardiovascular System Development and Function                                                                                    | pressure of heart                             | 6,59E-03 | 3   |
| Cellular Assembly and Organization                                                                                                | development of cytoplasm                      | 6,88E-03 | 16  |
| Cell Death and Survival, Connective Tissue Development and Function                                                               | cell viability of fibroblast cell lines       | 6,89E-03 | 6   |
| Cell Death and Survival                                                                                                           | apoptosis of prostate cancer cell lines       | 7,30E-03 | 8   |
| Cancer, Gastrointestinal Disease, Organismal Injury and Abnormalities                                                             | colorectal carcinoma                          | 7,34E-03 | 112 |
| Cancer, Gastrointestinal Disease, Organismal Injury and Abnormalities                                                             | colon tumor                                   | 7,41E-03 | 114 |
| Cell Morphology                                                                                                                   | polarization of cells                         | 7,49E-03 | 8   |
| Cellular Growth and Proliferation                                                                                                 | proliferation of central nervous system cells | 7,85E-03 | 7   |
| Cell-To-Cell Signaling and Interaction                                                                                            | cell-cell adhesion of epithelial cells        | 7,85E-03 | 2   |
| Cell Death and Survival, Cellular Function and Maintenance                                                                        | clearance of E. coli                          | 7,85E-03 | 2   |
| Embryonic Development, Organismal Development, Tissue Development                                                                 | development of trophoblast                    | 7,85E-03 | 2   |
| Cell-To-Cell Signaling and Interaction, Cellular Function and Maintenance, Inflammatory Response                                  | phagocytosis of connective tissue cells       | 7,85E-03 | 2   |
| Cellular Assembly and Organization, Cellular Function and Maintenance, Cellular Movement, Nervous System Development and Function | endocytosis of synaptic vesicles              | 7,86E-03 | 3   |
| Cellular Function and Maintenance                                                                                                 | internalization of E. coli                    | 7,86E-03 | 3   |
| Cardiovascular Disease, Organismal Injury and Abnormalities                                                                       | systolic dysfunction                          | 7,86E-03 | 3   |
| Dermatological Diseases and Conditions, Organismal Injury and Abnormalities                                                       | ulceration of skin                            | 7,86E-03 | 3   |
| Cell Signaling                                                                                                                    | viral life cycle                              | 7,91E-03 | 5   |
| Hematological Disease                                                                                                             | hemorrhagic disease                           | 8,22E-03 | 10  |
| Cancer, Organismal Injury and Abnormalities, Respiratory Disease                                                                  | non-small cell lung cancer                    | 8,24E-03 | 42  |
| Cellular Assembly and Organization, Cellular Function and Maintenance                                                             | maintenance of telomeres                      | 8,26E-03 | 4   |
| Protein Degradation, Protein Synthesis                                                                                            | stabilization of protein                      | 8,31E-03 | 7   |
| Cell-To-Cell Signaling and Interaction, Inflammatory Response                                                                     | immune response of tumor cell lines           | 8,55E-03 | 7   |
| Developmental Disorder, Hereditary Disorder, Neurological Disease, Organismal Injury and Abnormalities                            | X-linked mental retardation                   | 8,58E-03 | 5   |
| Neurological Disease, Organismal Injury and Abnormalities                                                                         | neurodegeneration of cerebral cortex          | 8,72E-03 | 4   |

|                                                                                                                                                                                  |                                           |          |     |
|----------------------------------------------------------------------------------------------------------------------------------------------------------------------------------|-------------------------------------------|----------|-----|
| Cellular Function and Maintenance                                                                                                                                                | endocytosis                               | 8,72E-03 | 16  |
| Neurological Disease, Organismal Injury and Abnormalities                                                                                                                        | abnormality of cerebrum                   | 8,91E-03 | 10  |
| Cancer, Gastrointestinal Disease, Organismal Injury and Abnormalities                                                                                                            | colon cancer                              | 8,91E-03 | 113 |
| Cancer, Gastrointestinal Disease, Organismal Injury and Abnormalities                                                                                                            | colon carcinoma                           | 9,19E-03 | 109 |
| Lipid Metabolism, Small Molecule Biochemistry                                                                                                                                    | incorporation of fatty acid               | 9,25E-03 | 3   |
| Cardiovascular Disease, Developmental Disorder, Organismal Injury and Abnormalities                                                                                              | ventricular hypertrophy                   | 9,33E-03 | 6   |
| Embryonic Development, Organ Development, Organ Morphology, Organismal Development, Organismal Injury and Abnormalities, Respiratory Disease, Respiratory Cardiovascular Disease | abnormal morphology of lung interstitium  | 9,35E-03 | 2   |
| Cellular Function and Maintenance                                                                                                                                                | breakage of blood vessel                  | 9,35E-03 | 2   |
| Cardiovascular System Development and Function, Embryonic Development, Organismal Development, Tissue Development                                                                | endocytosis by dendritic cells            | 9,35E-03 | 2   |
| Cell Morphology, Cellular Assembly and Organization                                                                                                                              | vascularization of yolk sac               | 9,35E-03 | 2   |
| Cell Cycle, Cell Morphology, Cellular Assembly and Organization, DNA Replication, Recombination, and Repair                                                                      | morphology of nucleus                     | 9,55E-03 | 7   |
| Cell-To-Cell Signaling and Interaction                                                                                                                                           | abnormal morphology of chromosomes        | 1,00E-02 | 3   |
| Cellular Assembly and Organization, Cellular Function and Maintenance                                                                                                            | clustering of cells                       | 1,00E-02 | 3   |
| Hematological Disease, Infectious Diseases                                                                                                                                       | quantity of cellular protrusions          | 1,01E-02 | 7   |
| Cellular Assembly and Organization, Cellular Function and Maintenance                                                                                                            | malaria                                   | 1,02E-02 | 4   |
| Cell Death and Survival, Organismal Injury and Abnormalities                                                                                                                     | organization of Golgi apparatus           | 1,02E-02 | 4   |
| Cellular Development, Cellular Growth and Proliferation, Reproductive System Development and Function                                                                            | apoptosis of epithelial cells             | 1,05E-02 | 11  |
| Cell Death and Survival, Cellular Function and Maintenance                                                                                                                       | cell proliferation of breast cell lines   | 1,06E-02 | 6   |
| Cell Cycle                                                                                                                                                                       | colony survival of tumor cell lines       | 1,08E-02 | 3   |
| Cardiovascular Disease, Organismal Injury and Abnormalities                                                                                                                      | polyploidization of cells                 | 1,08E-02 | 3   |
| Cardiovascular System Development and Function, Organ Morphology, Organismal Development                                                                                         | arrhythmia                                | 1,09E-02 | 9   |
| Cell Death and Survival                                                                                                                                                          | morphology of heart ventricle             | 1,09E-02 | 9   |
| Cellular Assembly and Organization                                                                                                                                               | apoptosis of pancreatic cancer cell lines | 1,09E-02 | 6   |
| Embryonic Development, Nervous System Development and Function, Organ Development, Organismal Development, Tissue Development                                                    | clustering of membrane rafts              | 1,10E-02 | 2   |
| Cellular Assembly and Organization                                                                                                                                               | formation of anterior commissure          | 1,10E-02 | 2   |
| Cell-To-Cell Signaling and Interaction, Cellular Assembly and Organization, Cellular Function and Maintenance                                                                    | formation of endosomes                    | 1,10E-02 | 2   |
| Lipid Metabolism, Small Molecule Biochemistry                                                                                                                                    | formation of focal complexes              | 1,10E-02 | 2   |
| Cell Morphology, Hematological System Development and Function                                                                                                                   | incorporation of palmitic acid            | 1,10E-02 | 2   |
| Cell Morphology, Cellular Assembly and Organization, Cellular Function and Maintenance                                                                                           | polarization of leukocyte cell lines      | 1,10E-02 | 2   |
| Cellular Assembly and Organization, Cellular Function and Maintenance, Tissue Development                                                                                        | reorganization of actin stress fibers     | 1,10E-02 | 2   |
| Cardiovascular Disease, Organismal Injury and Abnormalities                                                                                                                      | formation of actin filaments              | 1,12E-02 | 11  |
| Cellular Growth and Proliferation, Organismal Development                                                                                                                        | abnormality of ventricular septum         | 1,13E-02 | 4   |
| Cell Cycle                                                                                                                                                                       | growth of yeast                           | 1,13E-02 | 5   |
| Cardiovascular System Development and Function, Cellular Function and Maintenance, Organ Development, Skeletal and Muscular System Development and Function, Tissue Development  | G2 phase                                  | 1,15E-02 | 10  |
| Cell Morphology, Embryonic Development                                                                                                                                           | function of cardiomyocytes                | 1,16E-02 | 3   |
|                                                                                                                                                                                  | patterning of cells                       | 1,16E-02 | 3   |

|                                                                                                                                                                |                                                                                          |          |     |
|----------------------------------------------------------------------------------------------------------------------------------------------------------------|------------------------------------------------------------------------------------------|----------|-----|
| Cellular Assembly and Organization, Cellular Function and Maintenance                                                                                          | quantity of filopodia                                                                    | 1,16E-02 | 3   |
| Cancer, Gastrointestinal Disease, Organismal Injury and Abnormalities                                                                                          | colon adenocarcinoma                                                                     | 1,20E-02 | 107 |
| Cancer, Organismal Injury and Abnormalities                                                                                                                    | metastatic carcinoma                                                                     | 1,21E-02 | 7   |
| Cell Morphology, Cellular Assembly and Organization, Cellular Function and Maintenance                                                                         | reorganization of actin cytoskeleton                                                     | 1,23E-02 | 6   |
| Connective Tissue Disorders, Developmental Disorder, Hereditary Disorder, Organismal Injury and Abnormalities, Skeletal and Muscular Disorders                 | Catel-Manzke syndrome                                                                    | 1,24E-02 | 1   |
| Hereditary Disorder, Neurological Disease, Organismal Injury and Abnormalities, Skeletal and Muscular Disorders                                                | Charcot-Marie-Tooth disease axonal type 2D                                               | 1,24E-02 | 1   |
| Cardiovascular Disease, Developmental Disorder, Hematological Disease, Hereditary Disorder, Organismal Injury and Abnormalities                                | Fanconi's anemia group G                                                                 | 1,24E-02 | 1   |
| Connective Tissue Disorders, Developmental Disorder, Organismal Injury and Abnormalities, Skeletal and Muscular Disorders                                      | Lethal arthrogryposis with anterior horn cell disease                                    | 1,24E-02 | 1   |
| Connective Tissue Disorders, Developmental Disorder, Hereditary Disorder, Neurological Disease, Organismal Injury and Abnormalities, Skeletal and Muscular     | Lethal congenital contractural syndrom finnish type                                      | 1,24E-02 | 1   |
| Cell Morphology, Hematological System Development and Function, Inflammatory Response                                                                          | M2 polarization of peritoneal macrophages                                                | 1,24E-02 | 1   |
| Connective Tissue Disorders, Dermatological Diseases and Conditions, Developmental Disorder, Hereditary Disorder, Immunological Disease, Organismal Injury and | OL-EDA-ID syndrome                                                                       | 1,24E-02 | 1   |
| Connective Tissue Disorders, Developmental Disorder, Hereditary Disorder, Neurological Disease, Organismal Injury and Abnormalities, Skeletal and Muscular     | Seckel syndrome type 9                                                                   | 1,24E-02 | 1   |
| Cardiovascular Disease, Developmental Disorder, Hematological Disease, Hereditary Disorder, Immunological Disease, Organismal Injury and Abnormalities         | T-cell immunodeficiency, recurrent infections, autoimmunity, and cardiac malformations   | 1,24E-02 | 1   |
| Developmental Disorder, Hereditary Disorder, Neurological Disease, Organismal Injury and Abnormalities                                                         | X linked mental retardation syndromic jarid1c-related                                    | 1,24E-02 | 1   |
| Hereditary Disorder, Immunological Disease, Infectious Diseases, Organismal Injury and Abnormalities                                                           | X-linked familial atypical mycobacteriosis 1                                             | 1,24E-02 | 1   |
| Dermatological Diseases and Conditions, Developmental Disorder, Hematological Disease, Hereditary Disorder, Immunological Disease, Organismal Injury and       | X-linked hyper-IgM syndrome with etodermal dysplasia                                     | 1,24E-02 | 1   |
| Developmental Disorder, Hereditary Disorder, Neurological Disease, Organismal Injury and Abnormalities                                                         | X-linked mental retardation type 100                                                     | 1,24E-02 | 1   |
| Developmental Disorder, Hereditary Disorder, Neurological Disease, Organismal Injury and Abnormalities                                                         | X-linked mental retardation with cerebellar hypoplasia and distinctive facial appearance | 1,24E-02 | 1   |
| Cardiovascular Disease, Cardiovascular System Development and Function, Tissue Morphology                                                                      | abnormal morphology of superior vena cava                                                | 1,24E-02 | 1   |
| Small Molecule Biochemistry                                                                                                                                    | absorption of fexofenadine                                                               | 1,24E-02 | 1   |
| Lipid Metabolism, Molecular Transport, Small Molecule Biochemistry                                                                                             | absorption of pravastatin                                                                | 1,24E-02 | 1   |
| Cellular Growth and Proliferation                                                                                                                              | accumulation of lymphoblastoid cell lines                                                | 1,24E-02 | 1   |
| Organismal Development                                                                                                                                         | accumulation of mucus                                                                    | 1,24E-02 | 1   |
| Cellular Compromise, Nervous System Development and Function                                                                                                   | acidification of synaptic vesicles                                                       | 1,24E-02 | 1   |
| Lipid Metabolism, Small Molecule Biochemistry                                                                                                                  | activation of epoprostenol                                                               | 1,24E-02 | 1   |
| Cell-To-Cell Signaling and Interaction, Hematological System Development and Function, Immune Cell Trafficking, Inflammatory Response                          | activation of follicular dendritic cells                                                 | 1,24E-02 | 1   |
| Inflammatory Response, Respiratory System Development and Function                                                                                             | acute inflammatory response of airway                                                    | 1,24E-02 | 1   |
| Cell-To-Cell Signaling and Interaction, Hematological System Development and Function, Immune Cell Trafficking, Inflammatory Response                          | adhesion of Langerhans cells                                                             | 1,24E-02 | 1   |
| Embryonic Development, Tissue Development                                                                                                                      | adhesion of embryoblast                                                                  | 1,24E-02 | 1   |
| Cell-To-Cell Signaling and Interaction, Embryonic Development                                                                                                  | adhesion of epiblast cells                                                               | 1,24E-02 | 1   |
| Cell-To-Cell Signaling and Interaction                                                                                                                         | adhesion of neural stem cells                                                            | 1,24E-02 | 1   |
| Cell-To-Cell Signaling and Interaction                                                                                                                         | aggregation of endothelial cells                                                         | 1,24E-02 | 1   |
| Cell Morphology, Cellular Assembly and Organization, Nervous System Development and Function                                                                   | alignment of active zone                                                                 | 1,24E-02 | 1   |
| Cell Morphology, Cellular Assembly and Organization, Skeletal and Muscular System Development and Function                                                     | alignment of junctional folds                                                            | 1,24E-02 | 1   |
| Cell Cycle, Hepatic System Development and Function                                                                                                            | aneuploidy of hepatocytes                                                                | 1,24E-02 | 1   |
| Cancer, Organismal Injury and Abnormalities                                                                                                                    | angiomatoid fibrous histiocytoma                                                         | 1,24E-02 | 1   |

|                                                                                                                                                                          |                                                                                     |          |   |
|--------------------------------------------------------------------------------------------------------------------------------------------------------------------------|-------------------------------------------------------------------------------------|----------|---|
| Ophthalmic Disease, Organismal Injury and Abnormalities                                                                                                                  | anisocoria                                                                          | 1,24E-02 | 1 |
| Developmental Disorder, Organismal Injury and Abnormalities, Reproductive System Disease                                                                                 | apocrine metaplasia of mammary gland                                                | 1,24E-02 | 1 |
| Cell Death and Survival                                                                                                                                                  | apoptosis of B-2 lymphocytes                                                        | 1,24E-02 | 1 |
| Cell Death and Survival                                                                                                                                                  | apoptosis of fibroblastoids                                                         | 1,24E-02 | 1 |
| Cell Death and Survival, Neurological Disease, Organismal Injury and Abnormalities                                                                                       | apoptosis of gonadotropes                                                           | 1,24E-02 | 1 |
| Cell Death and Survival, Skeletal and Muscular Disorders                                                                                                                 | apoptosis of neointimal cells                                                       | 1,24E-02 | 1 |
| Cell Cycle                                                                                                                                                               | arrest in G1 phase of megakaryocyte/erythrocyte lineage-restricted progenitor cells | 1,24E-02 | 1 |
| Cell Cycle                                                                                                                                                               | arrest in G2 phase of megakaryocyte/erythrocyte lineage-restricted progenitor cells | 1,24E-02 | 1 |
| Cell Cycle                                                                                                                                                               | arrest in G2/M phase transition of lymphoblasts                                     | 1,24E-02 | 1 |
| Cell Cycle                                                                                                                                                               | arrest in S phase of myeloma cell lines                                             | 1,24E-02 | 1 |
| Cell Cycle                                                                                                                                                               | arrest in cell division of bone cancer cell lines                                   | 1,24E-02 | 1 |
| Cell Cycle                                                                                                                                                               | arrest in cell division of sarcoma cell lines                                       | 1,24E-02 | 1 |
| Cellular Development, Cellular Growth and Proliferation, Embryonic Development, Hematological System Development and Function, Hematopoiesis, Humoral Immune             | arrest in development of B-1 lymphocytes                                            | 1,24E-02 | 1 |
| Cellular Development, Cellular Growth and Proliferation, Embryonic Development, Hematological System Development and Function, Hematopoiesis, Humoral Immune             | arrest in development of marginal-zone B lymphocytes                                | 1,24E-02 | 1 |
| Cellular Development, Cellular Growth and Proliferation, Embryonic Development, Hematological System Development and Function, Hematopoiesis, Humoral Immune             | arrest in development of transitional B lymphocytes                                 | 1,24E-02 | 1 |
| Cellular Development, Cellular Growth and Proliferation, Embryonic Development, Hematological System Development and Function, Hematopoiesis, Humoral Immune             | arrest in development of transitional type 1 B lymphocytes                          | 1,24E-02 | 1 |
| Cardiovascular Disease, Organismal Injury and Abnormalities, Skeletal and Muscular Disorders                                                                             | arrhythmogenic right ventricular dysplasia familial 12                              | 1,24E-02 | 1 |
| Cell-To-Cell Signaling and Interaction                                                                                                                                   | attachment of blood platelets                                                       | 1,24E-02 | 1 |
| Dermatological Diseases and Conditions, Developmental Disorder, Hereditary Disorder, Organismal Injury and Abnormalities                                                 | atypical incontinentia pigmenti                                                     | 1,24E-02 | 1 |
| Cell Morphology, Cellular Function and Maintenance                                                                                                                       | autophagy of intestinal cell lines                                                  | 1,24E-02 | 1 |
| Cancer, Gastrointestinal Disease, Hereditary Disorder, Organismal Injury and Abnormalities                                                                               | autosomal dominant hereditary diffuse gastric cancer                                | 1,24E-02 | 1 |
| Connective Tissue Disorders, Dermatological Diseases and Conditions, Developmental Disorder, Hereditary Disorder, Metabolic Disease, Organismal Injury and Abnormalities | autosomal recessive cutis laxa type IB                                              | 1,24E-02 | 1 |
| Connective Tissue Disorders, Dermatological Diseases and Conditions, Developmental Disorder, Hereditary Disorder, Metabolic Disease, Organismal Injury and               | autosomal recessive cutis laxa type IIA                                             | 1,24E-02 | 1 |
| DNA Replication, Recombination, and Repair, Dermatological Diseases and Conditions, Developmental Disorder, Hereditary Disorder, Organismal Injury and Abnormalities     | autosomal recessive dyskeratosis congenita type 3                                   | 1,24E-02 | 1 |
| Hereditary Disorder, Neurological Disease, Organismal Injury and Abnormalities, Psychological Disorders, Skeletal and Muscular Disorders                                 | autosomal recessive early-onset parkinson disease 23                                | 1,24E-02 | 1 |
| Connective Tissue Disorders, Developmental Disorder, Hereditary Disorder, Organismal Injury and Abnormalities, Skeletal and Muscular Disorders                           | autosomal recessive osteopetrosis type 6                                            | 1,24E-02 | 1 |
| Connective Tissue Disorders, Developmental Disorder, Hereditary Disorder, Neurological Disease, Organismal Injury and Abnormalities, Skeletal and Muscular               | autosomal recessive primary microcephaly type 13                                    | 1,24E-02 | 1 |
| Hereditary Disorder, Neurological Disease, Organismal Injury and Abnormalities                                                                                           | autosomal recessive spastic paraplegia type 46                                      | 1,24E-02 | 1 |
| Cell-To-Cell Signaling and Interaction                                                                                                                                   | binding of colon cell lines                                                         | 1,24E-02 | 1 |
| Cell-To-Cell Signaling and Interaction                                                                                                                                   | binding of colonocytes                                                              | 1,24E-02 | 1 |
| Gene Expression                                                                                                                                                          | binding of origin of replication in the short region                                | 1,24E-02 | 1 |
| Carbohydrate Metabolism, Lipid Metabolism, Small Molecule Biochemistry                                                                                                   | binding of phosphatidylinositol 4-phosphate                                         | 1,24E-02 | 1 |
| Developmental Disorder, Hereditary Disorder, Metabolic Disease, Organismal Injury and Abnormalities                                                                      | branched-chain ketoacid dehydrogenase kinase deficiency                             | 1,24E-02 | 1 |
| Cellular Development                                                                                                                                                     | branching of bone marrow cell lines                                                 | 1,24E-02 | 1 |
| Cellular Development                                                                                                                                                     | branching of skin cell lines                                                        | 1,24E-02 | 1 |
| Small Molecule Biochemistry                                                                                                                                              | catabolism of spermidine                                                            | 1,24E-02 | 1 |

|                                                                                                                                                                                         |                                                                                         |          |   |
|-----------------------------------------------------------------------------------------------------------------------------------------------------------------------------------------|-----------------------------------------------------------------------------------------|----------|---|
| Cell Cycle                                                                                                                                                                              | cell cycle progression of megakaryocyte/erythrocyte lineage-restricted progenitor cells | 1,24E-02 | 1 |
| Cell Death and Survival                                                                                                                                                                 | cell death of Fanconi's anemia cell lines                                               | 1,24E-02 | 1 |
| Cellular Movement                                                                                                                                                                       | cell movement of keratinocyte cancer cell lines                                         | 1,24E-02 | 1 |
| Cell Death and Survival                                                                                                                                                                 | cell viability of gonadotropes                                                          | 1,24E-02 | 1 |
| Cell Death and Survival, Hematological System Development and Function                                                                                                                  | cell viability of long-term hematopoietic stem cells                                    | 1,24E-02 | 1 |
| Cell-To-Cell Signaling and Interaction, Embryonic Development                                                                                                                           | cell-cell contact of embryonic stem cell lines                                          | 1,24E-02 | 1 |
| Cell-To-Cell Signaling and Interaction, Embryonic Development                                                                                                                           | cell-cell contact of embryonic stem cells                                               | 1,24E-02 | 1 |
| Cell-To-Cell Signaling and Interaction                                                                                                                                                  | cell-cell contact of squamous carcinoma cells                                           | 1,24E-02 | 1 |
| Antimicrobial Response                                                                                                                                                                  | clearance of human respiratory syncytial virus A2                                       | 1,24E-02 | 1 |
| Cell-To-Cell Signaling and Interaction, Hematological System Development and Function, Humoral Immune Response, Immune Cell Trafficking, Inflammatory Cellular Growth and Proliferation | clustering of B lymphocytes                                                             | 1,24E-02 | 1 |
| Cancer, Gastrointestinal Disease, Organismal Injury and Abnormalities                                                                                                                   | colony formation of skeletal muscle satellite cells                                     | 1,24E-02 | 1 |
| Developmental Disorder, Hereditary Disorder, Metabolic Disease, Organismal Injury and Abnormalities                                                                                     | colorectal cancer with distant metastasis                                               | 1,24E-02 | 1 |
| Developmental Disorder, Hereditary Disorder, Metabolic Disease, Organismal Injury and Abnormalities                                                                                     | congenital disorder of glycosylation type 1m                                            | 1,24E-02 | 1 |
| Cardiovascular Disease, Organismal Injury and Abnormalities                                                                                                                             | congenital disorder of glycosylation type 2e                                            | 1,24E-02 | 1 |
| Cell-To-Cell Signaling and Interaction, Hematological System Development and Function                                                                                                   | congestion of venous system                                                             | 1,24E-02 | 1 |
| Dermatological Diseases and Conditions, Organismal Injury and Abnormalities                                                                                                             | conjugation of natural killer T lymphocytes                                             | 1,24E-02 | 1 |
| Organismal Injury and Abnormalities, Tissue Morphology                                                                                                                                  | constriction of hair follicle                                                           | 1,24E-02 | 1 |
| Amino Acid Metabolism, Post-Translational Modification, Small Molecule Biochemistry                                                                                                     | contraction of wound                                                                    | 1,24E-02 | 1 |
| Tissue Development                                                                                                                                                                      | conversion of L-lysine                                                                  | 1,24E-02 | 1 |
| Hair and Skin Development and Function, Organ Morphology                                                                                                                                | cross-linkage of elastic fibers                                                         | 1,24E-02 | 1 |
| Hair and Skin Development and Function, Organ Morphology                                                                                                                                | curvature of auchene hair                                                               | 1,24E-02 | 1 |
| Hair and Skin Development and Function, Organ Morphology                                                                                                                                | curvature of awl hair                                                                   | 1,24E-02 | 1 |
| Hair and Skin Development and Function, Organ Morphology                                                                                                                                | curvature of guard hair                                                                 | 1,24E-02 | 1 |
| Hair and Skin Development and Function, Organ Morphology                                                                                                                                | curvature of zigzag hair                                                                | 1,24E-02 | 1 |
| Hereditary Disorder, Metabolic Disease, Organismal Injury and Abnormalities                                                                                                             | deficiency of group IV A phospholipase A2                                               | 1,24E-02 | 1 |
| Cellular Compromise                                                                                                                                                                     | deformation of spindle pole                                                             | 1,24E-02 | 1 |
| Developmental Disorder, Embryonic Development, Tissue Morphology                                                                                                                        | degeneration of yolk sac                                                                | 1,24E-02 | 1 |
| Cellular Compromise, Inflammatory Response                                                                                                                                              | degranulation of dendritic epidermal T cells                                            | 1,24E-02 | 1 |
| Cell Morphology, Hair and Skin Development and Function                                                                                                                                 | delay in cell spreading of epithelial cell lines                                        | 1,24E-02 | 1 |
| Cell Morphology, Connective Tissue Development and Function                                                                                                                             | delay in cell spreading of fibroblast cell lines                                        | 1,24E-02 | 1 |
| Cellular Development, Cellular Growth and Proliferation                                                                                                                                 | delay in growth of breast cancer cell lines                                             | 1,24E-02 | 1 |
| Cellular Assembly and Organization, DNA Replication, Recombination, and Repair                                                                                                          | delay in initiation of chromosomal congression of chromosomes                           | 1,24E-02 | 1 |
| Cell Death and Survival, Cellular Function and Maintenance                                                                                                                              | delay in initiation of clearance of pneumocytes                                         | 1,24E-02 | 1 |
| Cellular Movement, Nervous System Development and Function                                                                                                                              | delay in initiation of migration of cortical projection neurons                         | 1,24E-02 | 1 |
| DNA Replication, Recombination, and Repair, Gene Expression                                                                                                                             | demethylation of double-stranded DNA                                                    | 1,24E-02 | 1 |
| Nervous System Development and Function, Tissue Morphology                                                                                                                              | density of serotonergic neurons                                                         | 1,24E-02 | 1 |

|                                                                                                                                                                                                                                                                                  |                                                                          |          |   |
|----------------------------------------------------------------------------------------------------------------------------------------------------------------------------------------------------------------------------------------------------------------------------------|--------------------------------------------------------------------------|----------|---|
| Cellular Compromise                                                                                                                                                                                                                                                              | depletion of hippocampal neurons                                         | 1,24E-02 | 1 |
| Embryonic Development, Nervous System Development and Function, Organ Development, Organismal Development, Tissue Development                                                                                                                                                    | development of dorsal lateral geniculate nucleus                         | 1,24E-02 | 1 |
| Embryonic Development, Hair and Skin Development and Function, Organ Development, Organismal Development, Tissue Development                                                                                                                                                     | development of hair cuticle                                              | 1,24E-02 | 1 |
| Embryonic Development, Nervous System Development and Function, Organ Development, Organismal Development, Tissue Development                                                                                                                                                    | development of layer IV                                                  | 1,24E-02 | 1 |
| Cardiovascular System Development and Function, Organismal Development                                                                                                                                                                                                           | development of left common carotid artery                                | 1,24E-02 | 1 |
| Nervous System Development and Function                                                                                                                                                                                                                                          | development of limbic system                                             | 1,24E-02 | 1 |
| Cardiovascular System Development and Function, Cellular Development, Cellular Growth and Proliferation, Embryonic Development, Organ Development, Organismal Development, Hair and Skin Development and Function, Organ Development, Organismal Development, Tissue Development | development of pacemaker cells                                           | 1,24E-02 | 1 |
| Cellular Development, Endocrine System Development and Function                                                                                                                                                                                                                  | development of vibrissae                                                 | 1,24E-02 | 1 |
| Cardiovascular Disease, Hereditary Disorder, Organismal Injury and Abnormalities, Skeletal and Muscular Disorders                                                                                                                                                                | differentiation of enteroendocrine cells                                 | 1,24E-02 | 1 |
| Cell Morphology                                                                                                                                                                                                                                                                  | dilated cardiomyopathy type 1J1                                          | 1,24E-02 | 1 |
| Cell Morphology                                                                                                                                                                                                                                                                  | elongation of fibroblasts                                                | 1,24E-02 | 1 |
| Cell Morphology                                                                                                                                                                                                                                                                  | elongation of neuroblastoma cell lines                                   | 1,24E-02 | 1 |
| Hematopoiesis, Inflammatory Response                                                                                                                                                                                                                                             | emperipolesis of megakaryocytes                                          | 1,24E-02 | 1 |
| Cell Cycle                                                                                                                                                                                                                                                                       | entry into S phase of skin cancer cell lines                             | 1,24E-02 | 1 |
| Cellular Development, Cellular Growth and Proliferation                                                                                                                                                                                                                          | expansion of bladder cancer cell lines                                   | 1,24E-02 | 1 |
| Connective Tissue Development and Function, Tissue Development                                                                                                                                                                                                                   | expansion of brown adipose tissue                                        | 1,24E-02 | 1 |
| Embryonic Development, Organismal Development, Tissue Development, Tissue Morphology                                                                                                                                                                                             | expansion of epiblast                                                    | 1,24E-02 | 1 |
| Connective Tissue Development and Function, Organ Development, Reproductive System Development and Function, Tissue Development                                                                                                                                                  | expansion of epididymal fat                                              | 1,24E-02 | 1 |
| Connective Tissue Development and Function, Tissue Development                                                                                                                                                                                                                   | expansion of inguinal fat pad                                            | 1,24E-02 | 1 |
| Connective Tissue Development and Function, Tissue Development                                                                                                                                                                                                                   | expansion of mesenteric fat                                              | 1,24E-02 | 1 |
| Connective Tissue Development and Function, Tissue Development                                                                                                                                                                                                                   | expansion of retroperitoneal white adipose tissue                        | 1,24E-02 | 1 |
| Cardiovascular Disease, Connective Tissue Disorders, Dermatological Diseases and Conditions, Developmental Disorder, Gastrointestinal Disease, Hereditary Disorder, Cardiovascular Disease, Organismal Injury and Abnormalities                                                  | facial dysmorphism, immunodeficiency, livedo, and short stature syndrome | 1,24E-02 | 1 |
| Embryonic Development, Organismal Development, Tissue Development                                                                                                                                                                                                                | fibrosis of portal artery                                                | 1,24E-02 | 1 |
| Cellular Development, Cellular Growth and Proliferation, Embryonic Development, Hematological System Development and Function, Hematopoiesis, Lymphoid Tissue                                                                                                                    | formation of blastocle                                                   | 1,24E-02 | 1 |
| Embryonic Development, Organismal Development, Tissue Development                                                                                                                                                                                                                | formation of colony forming unit-megakaryocytes                          | 1,24E-02 | 1 |
| Cell Morphology, Cellular Assembly and Organization, Cellular Function and Maintenance                                                                                                                                                                                           | formation of ectoplacental cone                                          | 1,24E-02 | 1 |
| Cellular Assembly and Organization                                                                                                                                                                                                                                               | formation of filopodial tip                                              | 1,24E-02 | 1 |
| Cancer, Endocrine System Disorders, Organismal Injury and Abnormalities, Reproductive System Disease                                                                                                                                                                             | formation of macronuclei                                                 | 1,24E-02 | 1 |
| Cell Morphology, Cellular Assembly and Organization, Cellular Function and Maintenance                                                                                                                                                                                           | formation of ovarian adenocarcinoma                                      | 1,24E-02 | 1 |
| Embryonic Development, Organismal Development, Tissue Development                                                                                                                                                                                                                | formation of peripheral lamellae                                         | 1,24E-02 | 1 |
| Cardiovascular System Development and Function, Organ Development                                                                                                                                                                                                                | formation of trophoectoderm                                              | 1,24E-02 | 1 |
| Cancer, Hereditary Disorder, Neurological Disease, Organismal Injury and Abnormalities                                                                                                                                                                                           | function of right ventricle                                              | 1,24E-02 | 1 |
| Developmental Disorder, Hereditary Disorder, Metabolic Disease, Organismal Injury and Abnormalities, Renal and Urological Disease                                                                                                                                                | glioma susceptibility 9                                                  | 1,24E-02 | 1 |
| Infectious Diseases, Organismal Development                                                                                                                                                                                                                                      | glutaric acidemia type I                                                 | 1,24E-02 | 1 |
| Cancer, Cardiovascular Disease, Organismal Injury and Abnormalities                                                                                                                                                                                                              | growth of Sindbis virus                                                  | 1,24E-02 | 1 |
|                                                                                                                                                                                                                                                                                  | growth of cardiovascular neoplasm                                        | 1,24E-02 | 1 |

|                                                                                                                                                                                                                                                                       |                                                                                            |          |   |
|-----------------------------------------------------------------------------------------------------------------------------------------------------------------------------------------------------------------------------------------------------------------------|--------------------------------------------------------------------------------------------|----------|---|
| Cellular Development, Cellular Growth and Proliferation, Connective Tissue Development and Function, Tissue Development                                                                                                                                               | growth of fibroblastoids                                                                   | 1,24E-02 | 1 |
| Cardiovascular System Development and Function, Cellular Movement                                                                                                                                                                                                     | haptotaxis of endothelial cells                                                            | 1,24E-02 | 1 |
| Organismal Functions                                                                                                                                                                                                                                                  | healing of gastric epithelial cells                                                        | 1,24E-02 | 1 |
| Organismal Functions, Tissue Morphology                                                                                                                                                                                                                               | healing of intestinal epithelium                                                           | 1,24E-02 | 1 |
| Cardiovascular Disease, Developmental Disorder, Hereditary Disorder, Neurological Disease, Organismal Injury and Abnormalities                                                                                                                                        | heart and brain malformation syndrome                                                      | 1,24E-02 | 1 |
| Cancer, Connective Tissue Disorders, Developmental Disorder, Gastrointestinal Disease, Hereditary Disorder, Organismal Injury and Abnormalities, Skeletal and Hereditary Disorder, Metabolic Disease, Organismal Injury and Abnormalities                             | hereditary diffuse gastric cancer and cleft lip                                            | 1,24E-02 | 1 |
|                                                                                                                                                                                                                                                                       | hereditary folate malabsorption                                                            | 1,24E-02 | 1 |
| Cancer, Gastrointestinal Disease, Hereditary Disorder, Organismal Injury and Abnormalities                                                                                                                                                                            | hereditary nonpolyposis colorectal cancer type 4                                           | 1,24E-02 | 1 |
| Hereditary Disorder, Neurological Disease, Organismal Injury and Abnormalities                                                                                                                                                                                        | hereditary sensory neuropathy type IF                                                      | 1,24E-02 | 1 |
| Cellular Function and Maintenance                                                                                                                                                                                                                                     | homeostasis of tumor cells                                                                 | 1,24E-02 | 1 |
| Carbohydrate Metabolism, Lipid Metabolism, Small Molecule Biochemistry                                                                                                                                                                                                | hydrolysis of sn-2-arachidonylphosphatidylcholine                                          | 1,24E-02 | 1 |
| Cell Death and Survival, DNA Replication, Recombination, and Repair                                                                                                                                                                                                   | hypercondensation of chromatin                                                             | 1,24E-02 | 1 |
| DNA Replication, Recombination, and Repair                                                                                                                                                                                                                            | hypercondensation of chromosomes                                                           | 1,24E-02 | 1 |
| Cardiovascular Disease, Endocrine System Disorders, Hematological Disease, Metabolic Disease                                                                                                                                                                          | hyperglycemia of portal vein                                                               | 1,24E-02 | 1 |
| Cardiovascular Disease, Endocrine System Disorders, Gastrointestinal Disease, Metabolic Disease, Organismal Injury and Abnormalities                                                                                                                                  | hyperinsulinism of portal vein                                                             | 1,24E-02 | 1 |
| Developmental Disorder, Ophthalmic Disease, Organismal Injury and Abnormalities                                                                                                                                                                                       | hypertrophy of cornea                                                                      | 1,24E-02 | 1 |
| Cancer, Developmental Disorder, Endocrine System Disorders, Gastrointestinal Disease, Hematological Disease, Hereditary Disorder, Metabolic Disease, Organismal Injury and Abnormalities                                                                              | hypoinsulinemic hypoglycemia with hemihypertrophy                                          | 1,24E-02 | 1 |
| Dental Disease, Developmental Disorder, Digestive System Development and Function, Endocrine System Disorders, Gastrointestinal Disease, Hereditary Disorder, Hereditary Disorder, Neurological Disease, Organismal Injury and Abnormalities, Psychological Disorders | hypomyelinating leukodystrophy type 7 with oligodontia and hypogonadotropic hypogonadism   | 1,24E-02 | 1 |
| Cell-To-Cell Signaling and Interaction, Inflammatory Response                                                                                                                                                                                                         | hypomyelinating leukodystrophy type 7 without oligodontia or hypogonadotropic hypogonadism | 1,24E-02 | 1 |
| Hereditary Disorder, Immunological Disease, Organismal Injury and Abnormalities                                                                                                                                                                                       | immune response of renal tubular epithelial cells                                          | 1,24E-02 | 1 |
| Hereditary Disorder, Immunological Disease, Organismal Injury and Abnormalities                                                                                                                                                                                       | immunodeficiency 28                                                                        | 1,24E-02 | 1 |
| Behavior                                                                                                                                                                                                                                                              | immunodeficiency-centromeric instability-facial anomalies syndrome type 4                  | 1,24E-02 | 1 |
| Lipid Metabolism, Small Molecule Biochemistry                                                                                                                                                                                                                         | impulsive behavior                                                                         | 1,24E-02 | 1 |
| Cell Signaling, Vitamin and Mineral Metabolism                                                                                                                                                                                                                        | incorporation of 15-(4-iodophenyl)-3-methylpentadecanoic acid                              | 1,24E-02 | 1 |
| Cellular Function and Maintenance, Connective Tissue Development and Function                                                                                                                                                                                         | incorporation of Ca <sup>2+</sup>                                                          | 1,24E-02 | 1 |
| Cell-To-Cell Signaling and Interaction, Small Molecule Biochemistry                                                                                                                                                                                                   | incorporation of fibroblast cell lines                                                     | 1,24E-02 | 1 |
| Lipid Metabolism, Small Molecule Biochemistry                                                                                                                                                                                                                         | induction of acetylcholine                                                                 | 1,24E-02 | 1 |
| Cell-To-Cell Signaling and Interaction, Cellular Growth and Proliferation, Connective Tissue Development and Function                                                                                                                                                 | induction of diacylglycerol                                                                | 1,24E-02 | 1 |
| Organ Development, Organ Morphology, Reproductive System Development and Function                                                                                                                                                                                     | induction of fibroblast cell lines                                                         | 1,24E-02 | 1 |
| Infectious Diseases                                                                                                                                                                                                                                                   | induction of mammary gland                                                                 | 1,24E-02 | 1 |
| Gastrointestinal Disease, Infectious Diseases, Organismal Injury and Abnormalities                                                                                                                                                                                    | infection by mouse mammary tumor virus                                                     | 1,24E-02 | 1 |
| Gastrointestinal Disease, Infectious Diseases, Organismal Injury and Abnormalities                                                                                                                                                                                    | infection of cecum                                                                         | 1,24E-02 | 1 |
| Infectious Diseases, Organismal Injury and Abnormalities, Respiratory Disease                                                                                                                                                                                         | infection of colon                                                                         | 1,24E-02 | 1 |
| Cell Death and Survival                                                                                                                                                                                                                                               | infection of pneumocytes                                                                   | 1,24E-02 | 1 |
| Cell Morphology, Cellular Assembly and Organization, Cellular Development, Cellular Function and Maintenance, Cellular Growth and Proliferation, Nervous System                                                                                                       | initiation of apoptosis of colorectal cancer cell lines                                    | 1,24E-02 | 1 |
|                                                                                                                                                                                                                                                                       | initiation of formation of dendrites                                                       | 1,24E-02 | 1 |



|                                                                                                                                                                       |                                                                  |          |   |
|-----------------------------------------------------------------------------------------------------------------------------------------------------------------------|------------------------------------------------------------------|----------|---|
| Organismal Injury and Abnormalities, Respiratory Disease                                                                                                              | injury of alveolar epithelium                                    | 1,24E-02 | 1 |
| Cellular Compromise, Gastrointestinal Disease, Organismal Injury and Abnormalities                                                                                    | injury of enterocytes                                            | 1,24E-02 | 1 |
| Cell Morphology, Cellular Movement, Nervous System Development and Function                                                                                           | innervation of serotonergic neurons                              | 1,24E-02 | 1 |
| Cellular Movement                                                                                                                                                     | invasion of enterocytes                                          | 1,24E-02 | 1 |
| Developmental Disorder, Hereditary Disorder, Ophthalmic Disease, Organismal Injury and Abnormalities                                                                  | iridogoniodysgenesis syndrome type 2                             | 1,24E-02 | 1 |
| Hereditary Disorder, Immunological Disease, Organismal Injury and Abnormalities                                                                                       | isolated immunodeficiency                                        | 1,24E-02 | 1 |
| Developmental Disorder, Hereditary Disorder, Neurological Disease, Organismal Injury and Abnormalities, Renal and Urological Disease, Skeletal and Muscular Disorders | joubert syndrome type 9                                          | 1,24E-02 | 1 |
| Endocrine System Disorders, Gastrointestinal Disease, Immunological Disease, Metabolic Disease, Organismal Injury and Abnormalities                                   | ketosis-prone diabetes mellitus                                  | 1,24E-02 | 1 |
| Cardiovascular Disease, Cardiovascular System Development and Function, Organ Morphology, Organismal Development, Organismal Injury and Abnormalities, Tissue         | lack of coronary sinus                                           | 1,24E-02 | 1 |
| Connective Tissue Development and Function, Connective Tissue Disorders, Organ Morphology, Organismal Development, Organismal Injury and Abnormalities, Skeletal      | lack of metacarpal bone                                          | 1,24E-02 | 1 |
| Nervous System Development and Function, Neurological Disease, Organ Morphology, Organismal Development, Organismal Injury and Abnormalities                          | lack of optic tract                                              | 1,24E-02 | 1 |
| Organismal Injury and Abnormalities                                                                                                                                   | leakage of interstitial fluid                                    | 1,24E-02 | 1 |
| Behavior                                                                                                                                                              | licking behavior of paw                                          | 1,24E-02 | 1 |
| Cell Death and Survival, Connective Tissue Disorders, Organismal Injury and Abnormalities, Tissue Morphology                                                          | loss of adipocytes                                               | 1,24E-02 | 1 |
| Lipid Metabolism, Small Molecule Biochemistry                                                                                                                         | loss of arachidonic acid                                         | 1,24E-02 | 1 |
| Cellular Function and Maintenance, Hematological System Development and Function                                                                                      | maintenance of long-term culture-initiating cells                | 1,24E-02 | 1 |
| Cancer, Organismal Injury and Abnormalities, Reproductive System Disease                                                                                              | malignant breast cancer                                          | 1,24E-02 | 1 |
| Cellular Development                                                                                                                                                  | maturation of myeloma cell lines                                 | 1,24E-02 | 1 |
| Endocrine System Disorders, Gastrointestinal Disease, Hereditary Disorder, Metabolic Disease, Organismal Injury and Abnormalities                                     | maturity-onset diabetes of the young type 9                      | 1,24E-02 | 1 |
| Cancer, Organismal Injury and Abnormalities                                                                                                                           | metastasis of ovarian cancer cells                               | 1,24E-02 | 1 |
| Cancer, Organismal Injury and Abnormalities, Reproductive System Disease                                                                                              | metastatic hydatidiform mole                                     | 1,24E-02 | 1 |
| Cellular Movement, Embryonic Development                                                                                                                              | migration of epiblast cells                                      | 1,24E-02 | 1 |
| Cellular Movement                                                                                                                                                     | migration of neuroblastoma cells                                 | 1,24E-02 | 1 |
| Embryonic Development                                                                                                                                                 | migration of trophoblast                                         | 1,24E-02 | 1 |
| Connective Tissue Disorders, Inflammatory Disease, Inflammatory Response, Organismal Injury and Abnormalities, Skeletal and Muscular Disorders                        | mild synovitis                                                   | 1,24E-02 | 1 |
| Cancer, Organismal Injury and Abnormalities, Reproductive System Disease                                                                                              | mixed ductal lobular breast carcinoma in situ                    | 1,24E-02 | 1 |
| Cell Morphology, Cellular Development, Cellular Growth and Proliferation                                                                                              | morphogenesis of hepatoma cell lines                             | 1,24E-02 | 1 |
| Cardiovascular System Development and Function, Organismal Development                                                                                                | morphogenesis of superior vena cava                              | 1,24E-02 | 1 |
| Cell Morphology, Cellular Compromise, Hair and Skin Development and Function                                                                                          | multinucleation of epithelial cell lines                         | 1,24E-02 | 1 |
| Developmental Disorder, Hereditary Disorder, Neurological Disease, Organismal Injury and Abnormalities, Skeletal and Muscular Disorders                               | multiple congenital anomalies-hypotonia-seizures syndrome type 1 | 1,24E-02 | 1 |
| Metabolic Disease                                                                                                                                                     | multiple mitochondrial dysfunctions syndrome type 2              | 1,24E-02 | 1 |
| Hereditary Disorder, Organismal Injury and Abnormalities, Renal and Urological Disease                                                                                | nephrotic syndrome type 9                                        | 1,24E-02 | 1 |
| Cellular Function and Maintenance, Reproductive System Development and Function                                                                                       | organization of gonadal cell lines                               | 1,24E-02 | 1 |
| Hematological System Development and Function, Tissue Morphology                                                                                                      | oxidation of blood                                               | 1,24E-02 | 1 |
| Inflammatory Disease, Inflammatory Response, Skeletal and Muscular Disorders                                                                                          | paralytic autoimmune myositis                                    | 1,24E-02 | 1 |
| Cardiovascular Disease, Developmental Disorder, Organismal Injury and Abnormalities                                                                                   | partial atrioventricular septal defect with heterotaxy syndrome  | 1,24E-02 | 1 |

|                                                                                                                                                                                                                                                 |                                                                                                 |          |   |
|-------------------------------------------------------------------------------------------------------------------------------------------------------------------------------------------------------------------------------------------------|-------------------------------------------------------------------------------------------------|----------|---|
| Embryonic Development, Organismal Development, Tissue Development                                                                                                                                                                               | patterning of sinus venosus                                                                     | 1,24E-02 | 1 |
| Cellular Compromise, Free Radical Scavenging, Lipid Metabolism, Small Molecule Biochemistry                                                                                                                                                     | peroxidation of monohydroperoxy-linoleic acid                                                   | 1,24E-02 | 1 |
| Small Molecule Biochemistry                                                                                                                                                                                                                     | phosphorylation of phytosphingosine                                                             | 1,24E-02 | 1 |
| Inflammatory Disease, Organismal Injury and Abnormalities, Reproductive System Disease                                                                                                                                                          | placentitis                                                                                     | 1,24E-02 | 1 |
| Cell Cycle                                                                                                                                                                                                                                      | polyploidization of T lymphocytes                                                               | 1,24E-02 | 1 |
| Cell Cycle, DNA Replication, Recombination, and Repair                                                                                                                                                                                          | polyploidization of chromosomes                                                                 | 1,24E-02 | 1 |
| Cell Cycle                                                                                                                                                                                                                                      | polyploidization of epithelial cell lines                                                       | 1,24E-02 | 1 |
| Cell Cycle                                                                                                                                                                                                                                      | polyploidization of kidney cell lines                                                           | 1,24E-02 | 1 |
| Cancer, Organismal Injury and Abnormalities, Respiratory Disease                                                                                                                                                                                | poorly differentiated non-small cell lung cancer                                                | 1,24E-02 | 1 |
| Cancer, Dermatological Diseases and Conditions, Organismal Injury and Abnormalities                                                                                                                                                             | poorly differentiated skin squamous cell carcinoma                                              | 1,24E-02 | 1 |
| Endocrine System Disorders, Metabolic Disease, Organismal Injury and Abnormalities                                                                                                                                                              | primary hyperthyroidism                                                                         | 1,24E-02 | 1 |
| Cellular Function and Maintenance, Cellular Growth and Proliferation, Hematological System Development and Function, Humoral Immune Response                                                                                                    | production of germinal center B lymphocytes                                                     | 1,24E-02 | 1 |
| Cellular Function and Maintenance                                                                                                                                                                                                               | progression of myoblasts                                                                        | 1,24E-02 | 1 |
| Cancer, Dermatological Diseases and Conditions, Organismal Injury and Abnormalities                                                                                                                                                             | progressive epidermal hyperplasia                                                               | 1,24E-02 | 1 |
| Hereditary Disorder, Neurological Disease, Organismal Injury and Abnormalities                                                                                                                                                                  | progressive myoclonic epilepsy type 9                                                           | 1,24E-02 | 1 |
| Cell Morphology, Cellular Assembly and Organization, Nervous System Development and Function                                                                                                                                                    | projection of corticothalamic axons                                                             | 1,24E-02 | 1 |
| Embryonic Development, Tissue Development                                                                                                                                                                                                       | proliferation of ectoplacental cone                                                             | 1,24E-02 | 1 |
| Cellular Growth and Proliferation, Connective Tissue Development and Function, Tissue Development                                                                                                                                               | proliferation of non-parenchymal cells                                                          | 1,24E-02 | 1 |
| Organ Morphology                                                                                                                                                                                                                                | quantity of anterior commissure                                                                 | 1,24E-02 | 1 |
| Nervous System Development and Function, Organ Morphology                                                                                                                                                                                       | quantity of corpus callosum                                                                     | 1,24E-02 | 1 |
| Cellular Development, Cellular Growth and Proliferation, Embryonic Development, Organismal Development, Tissue Morphology                                                                                                                       | quantity of embryoid body cells                                                                 | 1,24E-02 | 1 |
| Organ Morphology, Renal and Urological System Development and Function                                                                                                                                                                          | quantity of mesangial matrix                                                                    | 1,24E-02 | 1 |
| Hematological System Development and Function, Tissue Morphology                                                                                                                                                                                | quantity of nuocytes                                                                            | 1,24E-02 | 1 |
| Cell Morphology, Nervous System Development and Function, Skeletal and Muscular System Development and Function                                                                                                                                 | re-innervation of skeletal muscle                                                               | 1,24E-02 | 1 |
| Carbohydrate Metabolism                                                                                                                                                                                                                         | recognition of heparan sulfate                                                                  | 1,24E-02 | 1 |
| Carbohydrate Metabolism                                                                                                                                                                                                                         | recognition of hyaluronic acid                                                                  | 1,24E-02 | 1 |
| Lipid Metabolism, Small Molecule Biochemistry                                                                                                                                                                                                   | recognition of paclitaxel                                                                       | 1,24E-02 | 1 |
| Cell-To-Cell Signaling and Interaction, Cell-mediated Immune Response, Cellular Movement, Hematological System Development and Function, Immune Cell Trafficking                                                                                | recruitment of activated T lymphocyte                                                           | 1,24E-02 | 1 |
| Cardiovascular Disease, Developmental Disorder, Gastrointestinal Disease, Hepatic System Disease, Hereditary Disorder, Infectious Diseases, Neurological Disease, Hereditary Disorder, Infectious Diseases, Organismal Injury and Abnormalities | recurrent infections with encephalopathy, hepatic dysfunction, and cardiovascular malformations | 1,24E-02 | 1 |
| Carbohydrate Metabolism, Lipid Metabolism, Molecular Transport, Small Molecule Biochemistry                                                                                                                                                     | recurrent isolated invasive pneumococcal disease type 2                                         | 1,24E-02 | 1 |
| Cellular Function and Maintenance                                                                                                                                                                                                               | redistribution of phosphatidylinositol-3,4,5-triphosphate                                       | 1,24E-02 | 1 |
| Cellular Assembly and Organization, Cellular Function and Maintenance                                                                                                                                                                           | regulation of enterocytes                                                                       | 1,24E-02 | 1 |
| Tissue Morphology                                                                                                                                                                                                                               | release of microvesicles                                                                        | 1,24E-02 | 1 |
| Respiratory System Development and Function, Tissue Development                                                                                                                                                                                 | remodeling of left common carotid artery                                                        | 1,24E-02 | 1 |
| Cell-To-Cell Signaling and Interaction, Cell-mediated Immune Response, Cellular Function and Maintenance, Cellular Movement, Hematological System Development                                                                                   | response of bronchial tissue                                                                    | 1,24E-02 | 1 |
|                                                                                                                                                                                                                                                 | retention of regulatory T lymphocytes                                                           | 1,24E-02 | 1 |

|                                                                                                                                                                   |                                                           |          |    |
|-------------------------------------------------------------------------------------------------------------------------------------------------------------------|-----------------------------------------------------------|----------|----|
| Connective Tissue Disorders, Developmental Disorder, Hereditary Disorder, Metabolic Disease, Organismal Injury and Abnormalities, Skeletal and Muscular Disorders | rhizomelic chondrodysplasia punctata type 2               | 1,24E-02 | 1  |
| Ophthalmic Disease, Organismal Injury and Abnormalities                                                                                                           | ring dermoid of cornea                                    | 1,24E-02 | 1  |
| Hematological Disease, Infectious Diseases                                                                                                                        | severe malaria                                            | 1,24E-02 | 1  |
| Cell Morphology, Cellular Compromise                                                                                                                              | shrinkage of astrocytes                                   | 1,24E-02 | 1  |
| Nervous System Development and Function, Organ Morphology, Organismal Development                                                                                 | size of optic chiasm                                      | 1,24E-02 | 1  |
| Nervous System Development and Function                                                                                                                           | specific gravity of brain tissue                          | 1,24E-02 | 1  |
| Connective Tissue Disorders, Developmental Disorder, Hereditary Disorder, Organismal Injury and Abnormalities, Skeletal and Muscular Disorders                    | spondyloepimetaphyseal dysplasia with joint laxity type 2 | 1,24E-02 | 1  |
| Cell-To-Cell Signaling and Interaction, Cellular Growth and Proliferation, Hematological System Development and Function, Hypersensitivity Response, Inflammatory | stimulation of BMSC cells                                 | 1,24E-02 | 1  |
| Cardiovascular Disease, Cellular Compromise, Organ Morphology, Organismal Injury and Abnormalities                                                                | stress response of ventricular septum                     | 1,24E-02 | 1  |
| Carbohydrate Metabolism, Small Molecule Biochemistry                                                                                                              | sulfation of lactose                                      | 1,24E-02 | 1  |
| Cancer, Gastrointestinal Disease, Hereditary Disorder, Organismal Injury and Abnormalities                                                                        | susceptibility to colorectal cancer type 12               | 1,24E-02 | 1  |
| Cancer, Dermatological Diseases and Conditions, Organismal Injury and Abnormalities                                                                               | susceptibility to cutaneous malignant melanoma type 10    | 1,24E-02 | 1  |
| Cardiovascular Disease, Organismal Injury and Abnormalities                                                                                                       | tachycardia of atrium                                     | 1,24E-02 | 1  |
| Cell Morphology, Organ Morphology, Organismal Development, Renal and Urological System Development and Function, Tissue Morphology                                | thickness of glomerular basement membrane                 | 1,24E-02 | 1  |
| Lipid Metabolism, Molecular Transport, Small Molecule Biochemistry                                                                                                | transport of calcifediol                                  | 1,24E-02 | 1  |
| Lipid Metabolism, Small Molecule Biochemistry                                                                                                                     | turnover of arachidonic acid                              | 1,24E-02 | 1  |
| Developmental Disorder                                                                                                                                            | ulnar-mammary syndrome                                    | 1,24E-02 | 1  |
| Auditory Disease, Neurological Disease                                                                                                                            | unilateral hearing loss                                   | 1,24E-02 | 1  |
| DNA Replication, Recombination, and Repair                                                                                                                        | unwinding of origin of replication in the short region    | 1,24E-02 | 1  |
| Infectious Diseases                                                                                                                                               | uptake of Human adenovirus 35                             | 1,24E-02 | 1  |
| Lipid Metabolism, Molecular Transport, Small Molecule Biochemistry                                                                                                | uptake of omega-(4-iodophenyl)pentadecanoic acid          | 1,24E-02 | 1  |
| Cardiovascular System Development and Function, Organ Morphology, Organismal Development                                                                          | volume of right ventricle                                 | 1,24E-02 | 1  |
| Dermatological Diseases and Conditions, Developmental Disorder, Hereditary Disorder, Metabolic Disease, Organismal Injury and Abnormalities                       | wrinkly skin syndrome                                     | 1,24E-02 | 1  |
| Developmental Disorder, Hereditary Disorder, Neurological Disease, Organismal Injury and Abnormalities                                                            | x-linked mental retardation type 90                       | 1,24E-02 | 1  |
| Developmental Disorder, Hereditary Disorder, Neurological Disease, Organismal Injury and Abnormalities                                                            | x-linked mental retardation type 96                       | 1,24E-02 | 1  |
| Cellular Development, Cellular Growth and Proliferation, Embryonic Development, Hematological System Development and Function, Hematopoiesis, Lymphoid Tissue     | development of megakaryocytes                             | 1,25E-02 | 3  |
| Cellular Development, Cellular Growth and Proliferation                                                                                                           | cell proliferation of tumor cell lines                    | 1,26E-02 | 43 |
| Embryonic Development, Ophthalmic Disease, Organ Development, Organ Morphology, Organismal Development, Organismal Injury and Abnormalities, Tissue               | abnormal morphology of anterior chamber of eye            | 1,27E-02 | 2  |
| Cell Morphology                                                                                                                                                   | elongation of tumor cell lines                            | 1,27E-02 | 2  |
| Cellular Development                                                                                                                                              | epithelial-mesenchymal transition of hepatoma cell lines  | 1,27E-02 | 2  |
| Cardiovascular Disease, Hereditary Disorder, Organismal Injury and Abnormalities, Skeletal and Muscular Disorders                                                 | familial ventricular fibrillation                         | 1,27E-02 | 2  |
| Cancer, Organismal Injury and Abnormalities, Reproductive System Disease                                                                                          | tumorigenesis of breast adenocarcinoma                    | 1,27E-02 | 2  |
| Cancer, Organismal Injury and Abnormalities, Reproductive System Disease                                                                                          | breast adenocarcinoma                                     | 1,27E-02 | 14 |
| Endocrine System Disorders, Organ Morphology, Organismal Injury and Abnormalities, Reproductive System Development and Function, Reproductive System Disease      | abnormal morphology of seminiferous tubule                | 1,27E-02 | 6  |

| Network analysis | Score | Focus Molecules | ID |
|------------------|-------|-----------------|----|
|------------------|-------|-----------------|----|

|                                                                                                                       |    |    |    |
|-----------------------------------------------------------------------------------------------------------------------|----|----|----|
| Cell Cycle, Cellular Assembly and Organization, DNA Replication, Recombination, and Repair                            | 47 | 27 | 1  |
| Cell Cycle, DNA Replication, Recombination, and Repair, Cancer                                                        | 31 | 20 | 2  |
| Neurological Disease, Carbohydrate Metabolism, Molecular Transport                                                    | 31 | 20 | 3  |
| Cardiovascular Disease, Cell-To-Cell Signaling and Interaction, Cellular Function and Maintenance                     | 29 | 19 | 4  |
| Cell Signaling, Molecular Transport, Embryonic Development                                                            | 29 | 19 | 5  |
| Cardiovascular Disease, Connective Tissue Disorders, Developmental Disorder                                           | 27 | 18 | 6  |
| Amino Acid Metabolism, Post-Translational Modification, Small Molecule Biochemistry                                   | 27 | 18 | 7  |
| Cell-To-Cell Signaling and Interaction, Cellular Movement, Hematological System Development and Function              | 25 | 17 | 8  |
| Cellular Assembly and Organization, Cell-To-Cell Signaling and Interaction, Inflammatory Response                     | 25 | 17 | 9  |
| Cell Death and Survival, Renal Necrosis/Cell Death, Cell Morphology                                                   | 23 | 16 | 10 |
| Carbohydrate Metabolism, Energy Production, Lipid Metabolism                                                          | 21 | 15 | 11 |
| Inflammatory Disease, Inflammatory Response, Organismal Injury and Abnormalities                                      | 21 | 15 | 12 |
| RNA Post-Transcriptional Modification, Cellular Assembly and Organization, Connective Tissue Development and Function | 21 | 15 | 13 |
| Connective Tissue Disorders, Developmental Disorder, Gastrointestinal Disease                                         | 19 | 14 | 14 |
| Carbohydrate Metabolism, Lipid Metabolism, Small Molecule Biochemistry                                                | 19 | 14 | 15 |
| Cell Morphology, Hematological System Development and Function, Inflammatory Response                                 | 19 | 14 | 16 |
| Cancer, Neurological Disease, Organismal Injury and Abnormalities                                                     | 17 | 13 | 17 |
| Cellular Function and Maintenance, Cellular Growth and Proliferation, Hematological System Development and Function   | 15 | 12 | 18 |
| Hematological Disease, Hereditary Disorder, Organismal Injury and Abnormalities                                       | 14 | 11 | 19 |
| Gastrointestinal Disease, Hereditary Disorder, Inflammatory Disease                                                   | 2  | 1  | 20 |
| Respiratory Disease, Nervous System Development and Function, Organ Morphology                                        | 2  | 1  | 21 |

| Categories (Network 1)                                                                          | Diseases or Functions Annotation relevant to Top network | p-Value  |
|-------------------------------------------------------------------------------------------------|----------------------------------------------------------|----------|
| Cancer, Organismal Injury and Abnormalities, Renal and Urological Disease                       | tumorigenesis of urinary tract tumor                     | 2,33E-05 |
| Cell Morphology, Cellular Assembly and Organization, DNA Replication, Recombination, and Repair | morphology of mitotic spindle                            | 6,45E-05 |
| Cell Cycle, Cellular Assembly and Organization, DNA Replication, Recombination, and Repair      | segregation of chromosomes                               | 9,24E-05 |
| Cell Morphology, Cellular Assembly and Organization                                             | morphology of cytoskeleton                               | 1,87E-04 |
| Cell Death and Survival                                                                         | necrosis                                                 | 2,58E-04 |
| Cell Death and Survival                                                                         | apoptosis of tumor cell lines                            | 3,19E-04 |
| Neurological Disease, Organismal Injury and Abnormalities, Skeletal and Muscular Disorders      | autosomal recessive primary microcephaly                 | 3,39E-04 |
| Cell Cycle, Connective Tissue Development and Function                                          | aneuploidy of fibroblasts                                | 5,31E-04 |
| Cellular Function and Maintenance, Molecular Transport, Small Molecule Biochemistry             | homeostasis of Zn2+                                      | 6,15E-04 |
| Cell Death and Survival                                                                         | apoptosis of fibroblasts                                 | 8,54E-04 |
| Cell Death and Survival                                                                         | cell death                                               | 9,43E-04 |
| Cell Death and Survival                                                                         | cell death of tumor cell lines                           | 9,84E-04 |
| Cellular Assembly and Organization                                                              | binding of chromosomes                                   | 1,05E-03 |

|                                                                                                                                       |                                                     |          |
|---------------------------------------------------------------------------------------------------------------------------------------|-----------------------------------------------------|----------|
| Cell Cycle                                                                                                                            | arrest in mitosis of cervical cancer cell lines     | 1,07E-03 |
| Dermatological Diseases and Conditions, Hair and Skin Development and Function, Organ Morphology, Organismal Injury and Abnormalities | abnormal morphology of sparse hair                  | 1,22E-03 |
| Cellular Assembly and Organization, DNA Replication, Recombination, and Repair                                                        | quantity of mitotic spindle                         | 1,40E-03 |
| Protein Synthesis                                                                                                                     | quantity of GPT in blood                            | 1,55E-03 |
| Neurological Disease, Organismal Injury and Abnormalities, Skeletal and Muscular Disorders                                            | autosomal recessive primary microcephaly type 13    | 1,56E-03 |
| Cell Death and Survival                                                                                                               | apoptosis                                           | 1,84E-03 |
| Dermatological Diseases and Conditions, Hair and Skin Development and Function, Organ Morphology, Organismal Injury and Abnormalities | abnormal morphology of hair                         | 1,96E-03 |
| Cell Cycle                                                                                                                            | cell cycle progression                              | 1,97E-03 |
| Neurological Disease, Organismal Injury and Abnormalities                                                                             | seizures                                            | 2,50E-03 |
| Cell Cycle                                                                                                                            | mitosis                                             | 2,86E-03 |
| Cell Cycle                                                                                                                            | formation of mitotic spindle                        | 3,15E-03 |
| Cellular Development, Skeletal and Muscular System Development and Function, Tissue Development                                       | differentiation of skeletal muscle satellite cells  | 3,59E-03 |
| Cell Cycle, Cell Morphology, Cellular Assembly and Organization, DNA Replication, Recombination, and Repair                           | length of mitotic spindle                           | 3,59E-03 |
| Lipid Metabolism, Small Molecule Biochemistry                                                                                         | binding of tricaprilin                              | 3,75E-03 |
| Cellular Assembly and Organization, Cellular Function and Maintenance                                                                 | formation of midbody                                | 3,75E-03 |
| Cell Cycle, DNA Replication, Recombination, and Repair                                                                                | DNA replication checkpoint of cells                 | 4,06E-03 |
| Skeletal and Muscular System Development and Function                                                                                 | isometric tetanic force of skeletal muscle          | 4,06E-03 |
| Connective Tissue Disorders, Organismal Injury and Abnormalities, Tissue Morphology                                                   | abnormal morphology of mesenteric fat pad           | 4,37E-03 |
| Tissue Development                                                                                                                    | delay in regeneration of muscle                     | 4,37E-03 |
| Organ Development, Skeletal and Muscular System Development and Function                                                              | isometric twitch force of skeletal muscle           | 4,37E-03 |
| Embryonic Development, Organ Development, Organismal Development, Reproductive System Development and Function, Tissue Development    | development of female genital organ                 | 4,69E-03 |
| Cellular Development, Tissue Development                                                                                              | fate determination of myoblasts                     | 4,69E-03 |
| Cellular Assembly and Organization                                                                                                    | formation of midzone                                | 4,69E-03 |
| Cell Death and Survival                                                                                                               | apoptosis of pancreatic cancer cell lines           | 4,73E-03 |
| Developmental Disorder, Embryonic Development, Organismal Development, Tissue Morphology                                              | abnormal morphology of atrioventricular canal       | 4,74E-03 |
| Cell Death and Survival, Organismal Injury and Abnormalities                                                                          | apoptosis of colonocytes                            | 4,74E-03 |
| Neurological Disease, Organismal Injury and Abnormalities                                                                             | epileptic seizure                                   | 4,94E-03 |
| Developmental Disorder, Embryonic Development, Organismal Development, Tissue Morphology                                              | abnormal morphology of thin apical ectodermal ridge | 5,00E-03 |
| Hair and Skin Development and Function, Organ Development                                                                             | pigmentation of epidermis                           | 5,00E-03 |
| Digestive System Development and Function, Hepatic System Development and Function, Liver Regeneration, Organ Morphology              | regeneration of liver                               | 5,15E-03 |
| Cancer, Organismal Injury and Abnormalities, Reproductive System Disease                                                              | formation of uterine carcinoma                      | 5,31E-03 |
| Cardiovascular System Development and Function                                                                                        | hypoperfusion of brain                              | 5,31E-03 |
| Cardiovascular System Development and Function, Organismal Development                                                                | vascularization of aorta                            | 5,31E-03 |
| Cardiovascular System Development and Function, Embryonic Development, Organismal Development, Tissue Development                     | vascularization of somites                          | 5,31E-03 |
| Cellular Assembly and Organization, DNA Replication, Recombination, and Repair                                                        | alignment of chromosomes                            | 5,47E-03 |
| Cell Death and Survival, Cellular Compromise, Nervous System Development and Function                                                 | cytotoxicity of medium spiny neurons                | 5,62E-03 |

|                                                                                                                                                                                                                                                                                                                  |                                            |          |
|------------------------------------------------------------------------------------------------------------------------------------------------------------------------------------------------------------------------------------------------------------------------------------------------------------------|--------------------------------------------|----------|
| Cell Cycle, Embryonic Development                                                                                                                                                                                                                                                                                | polyploidization of embryonic cell lines   | 5,62E-03 |
| Cellular Compromise                                                                                                                                                                                                                                                                                              | damage of endothelial cell lines           | 5,93E-03 |
| Digestive System Development and Function, Organ Morphology, Organismal Development                                                                                                                                                                                                                              | mass of small intestine                    | 5,93E-03 |
| Digestive System Development and Function, Endocrine System Development and Function, Organ Morphology, Tissue Morphology                                                                                                                                                                                        | quantity of enteroendocrine L cells        | 5,93E-03 |
| Cell Death and Survival                                                                                                                                                                                                                                                                                          | necroptosis of fibroblasts                 | 6,04E-03 |
| Organ Morphology, Skeletal and Muscular System Development and Function                                                                                                                                                                                                                                          | isometric tension of skeletal muscle       | 6,24E-03 |
| Cell Morphology, Cellular Assembly and Organization, DNA Replication, Recombination, and Repair                                                                                                                                                                                                                  | abnormal morphology of meiotic spindles    | 6,56E-03 |
| Developmental Disorder                                                                                                                                                                                                                                                                                           | developmental delay of cardiac loop        | 6,56E-03 |
| Cell Morphology, Cellular Assembly and Organization, Tissue Development                                                                                                                                                                                                                                          | tubulation of mitochondria                 | 6,56E-03 |
| Cell Death and Survival                                                                                                                                                                                                                                                                                          | cell death of pancreatic cancer cell lines | 6,72E-03 |
| Neurological Disease, Organismal Injury and Abnormalities                                                                                                                                                                                                                                                        | limbic seizure                             | 6,87E-03 |
| Nervous System Development and Function, Neurological Disease, Organ Morphology, Organismal Development, Organismal Injury and Abnormalities                                                                                                                                                                     | abnormal morphology of Ammon's horn        | 7,18E-03 |
| Cellular Function and Maintenance                                                                                                                                                                                                                                                                                | endocytosis by dendritic cells             | 7,49E-03 |
| Neurological Disease, Psychological Disorders                                                                                                                                                                                                                                                                    | sporadic schizophrenia                     | 7,49E-03 |
| Gene Expression                                                                                                                                                                                                                                                                                                  | expression of RNA                          | 7,63E-03 |
| Organ Morphology, Organismal Injury and Abnormalities, Reproductive System Development and Function, Reproductive System Disease                                                                                                                                                                                 | abnormal morphology of clitoris            | 7,80E-03 |
| Developmental Disorder, Embryonic Development, Organismal Development, Tissue Morphology                                                                                                                                                                                                                         | abnormal morphology of foot plate          | 7,80E-03 |
| Cell Cycle, Reproductive System Development and Function                                                                                                                                                                                                                                                         | meiosis of male germ cells                 | 7,80E-03 |
| Gastrointestinal Disease, Hepatic System Disease, Liver Hemorrhaging, Organismal Injury and Abnormalities                                                                                                                                                                                                        | bleeding of liver                          | 8,09E-03 |
| Function, Hematopoiesis, Lymphoid Tissue Structure and Development, Organismal Injury and Abnormalities, Tissue Morphology                                                                                                                                                                                       | lack of megakaryocytes                     | 8,11E-03 |
| Embryonic Development, Organismal Development, Tissue Development                                                                                                                                                                                                                                                | development of neuroectoderm               | 8,42E-03 |
| Embryonic Development, Tissue Development                                                                                                                                                                                                                                                                        | accumulation of embryonic cell lines       | 9,04E-03 |
| Tissue Development                                                                                                                                                                                                                                                                                               | accumulation of kidney cell lines          | 9,04E-03 |
| Cellular Compromise                                                                                                                                                                                                                                                                                              | fragmentation of spindle pole              | 9,04E-03 |
| Cellular Assembly and Organization, Cellular Function and Maintenance, Tissue Development                                                                                                                                                                                                                        | formation of filament barbed ends          | 9,35E-03 |
| Cancer, Organismal Injury and Abnormalities, Renal and Urological Disease                                                                                                                                                                                                                                        | urothelial cancer                          | 9,38E-03 |
| Cellular Development, Skeletal and Muscular System Development and Function, Tissue Development                                                                                                                                                                                                                  | differentiation of muscle                  | 9,38E-03 |
| Cell Cycle                                                                                                                                                                                                                                                                                                       | ploidy                                     | 9,52E-03 |
| Embryonic Development, Organ Development, Organ Morphology, Organismal Development, Reproductive System Development and Function, Tissue Development                                                                                                                                                             | morphology of mammary gland                | 9,58E-03 |
| Cell Cycle                                                                                                                                                                                                                                                                                                       | mitotic index of tumor cell lines          | 9,66E-03 |
| Gastrointestinal Disease, Hepatic System Disease, Organismal Injury and Abnormalities                                                                                                                                                                                                                            | severe jaundice                            | 9,66E-03 |
| Lipid Metabolism, Small Molecule Biochemistry, Vitamin and Mineral Metabolism                                                                                                                                                                                                                                    | hydrolysis of retinyl ester                | 9,97E-03 |
| Cell-To-Cell Signaling and Interaction, Skeletal and Muscular System Development and Function                                                                                                                                                                                                                    | fusion of skeletal muscle satellite cells  | 1,03E-02 |
| Morphology, Organismal Development, Organismal Injury and Abnormalities, Skeletal and Muscular Disorders, Skeletal and Muscular System Development and Function, Development, Organismal Injury and Abnormalities, Reproductive System Development and Function, Reproductive System Disease, Tissue Development | lack of carpal bone                        | 1,03E-02 |
|                                                                                                                                                                                                                                                                                                                  | lack of mammary gland                      | 1,03E-02 |
| Vitamin and Mineral Metabolism                                                                                                                                                                                                                                                                                   | abnormal quantity of mineral               | 1,06E-02 |

|                                                                                                                                                      |                                                                                        |          |
|------------------------------------------------------------------------------------------------------------------------------------------------------|----------------------------------------------------------------------------------------|----------|
| Cellular Assembly and Organization, DNA Replication, Recombination, and Repair                                                                       | chromosomal congression of chromosomes                                                 | 1,08E-02 |
| Cardiovascular System Development and Function, Embryonic Development, Organismal Development, Tissue Development                                    | vascularization of yolk sac                                                            | 1,08E-02 |
| Cellular Assembly and Organization                                                                                                                   | movement of chromosomes                                                                | 1,09E-02 |
| Hair and Skin Development and Function, Tissue Development                                                                                           | accumulation of epithelial cell lines                                                  | 1,12E-02 |
| Energy Production                                                                                                                                    | consumption of oxygen                                                                  | 1,15E-02 |
| Cell Death and Survival                                                                                                                              | cell death of retinoblastoma cell lines                                                | 1,15E-02 |
| Cell Morphology, Hematological System Development and Function                                                                                       | polarization of B-lymphocyte derived cell lines                                        | 1,15E-02 |
| Digestive System Development and Function, Organ Development                                                                                         | function of salivary gland                                                             | 1,18E-02 |
| Cancer, Gastrointestinal Disease, Organismal Injury and Abnormalities                                                                                | tumorigenesis of intestinal adenoma                                                    | 1,21E-02 |
| Protein Synthesis                                                                                                                                    | quantity of aspartate transaminase in blood                                            | 1,22E-02 |
| Neurological Disease                                                                                                                                 | demyelination of white matter                                                          | 1,25E-02 |
| Cell Morphology, Cellular Assembly and Organization, Cellular Function and Maintenance                                                               | length of microtubules                                                                 | 1,25E-02 |
| Disorder, Hereditary Disorder, Immunological Disease, Organismal Injury and Abnormalities, Skeletal and Muscular Disorders                           | OL-EDA-ID syndrome                                                                     | 1,34E-02 |
| Hematological Disease, Hereditary Disorder, Immunological Disease, Organismal Injury and Abnormalities                                               | T-cell immunodeficiency, recurrent infections, autoimmunity, and cardiac malformations | 1,34E-02 |
| Developmental Disorder, Hereditary Disorder, Neurological Disease, Organismal Injury and Abnormalities                                               | X linked mental retardation syndromic jarid1c-related                                  | 1,34E-02 |
| Hereditary Disorder, Immunological Disease, Infectious Diseases, Organismal Injury and Abnormalities                                                 | X-linked familial atypical mycobacteriosis 1                                           | 1,34E-02 |
| Disease, Hereditary Disorder, Immunological Disease, Organismal Injury and Abnormalities                                                             | X-linked hyper-IgM syndrome with etodermal dysplasia                                   | 1,34E-02 |
| Developmental Disorder, Hereditary Disorder, Neurological Disease, Organismal Injury and Abnormalities                                               | X-linked mental retardation type 100                                                   | 1,34E-02 |
| Cell Cycle, Hepatic System Development and Function                                                                                                  | aneuploidy of hepatocytes                                                              | 1,34E-02 |
| Cell Death and Survival, Skeletal and Muscular Disorders                                                                                             | apoptosis of neointimal cells                                                          | 1,34E-02 |
| Hematological System Development and Function, Hematopoiesis, Humoral Immune Response, Lymphoid Tissue Structure and Development, Organ Development, | arrest in development of B-1 lymphocytes                                               | 1,34E-02 |
| Hematological System Development and Function, Hematopoiesis, Humoral Immune Response, Lymphoid Tissue Structure and Development, Organ Development, | arrest in development of marginal-zone B lymphocytes                                   | 1,34E-02 |
| Hematological System Development and Function, Hematopoiesis, Humoral Immune Response, Lymphoid Tissue Structure and Development, Organ Development, | arrest in development of transitional B lymphocytes                                    | 1,34E-02 |
| Hematological System Development and Function, Hematopoiesis, Humoral Immune Response, Lymphoid Tissue Structure and Development, Organ Development, | arrest in development of transitional type 1 B lymphocytes                             | 1,34E-02 |
| Dermatological Diseases and Conditions, Developmental Disorder, Hereditary Disorder, Organismal Injury and Abnormalities                             | atypical incontinentia pigmenti                                                        | 1,34E-02 |
| Gene Expression                                                                                                                                      | binding of origin of replication in the short region                                   | 1,34E-02 |
| Small Molecule Biochemistry                                                                                                                          | catabolism of spermidine                                                               | 1,34E-02 |
| Amino Acid Metabolism, Post-Translational Modification, Small Molecule Biochemistry                                                                  | conversion of L-lysine                                                                 | 1,34E-02 |
| Cellular Compromise, Neurological Disease, Organismal Injury and Abnormalities                                                                       | damage of CA3 neurons                                                                  | 1,34E-02 |
| Cellular Compromise                                                                                                                                  | deformation of spindle pole                                                            | 1,34E-02 |
| Developmental Disorder, Embryonic Development, Tissue Morphology                                                                                     | degeneration of yolk sac                                                               | 1,34E-02 |
| Cellular Assembly and Organization, DNA Replication, Recombination, and Repair                                                                       | delay in initiation of chromosomal congression of chromosomes                          | 1,34E-02 |
| Cellular Compromise                                                                                                                                  | depletion of hippocampal neurons                                                       | 1,34E-02 |
| Nervous System Development and Function                                                                                                              | development of limbic system                                                           | 1,34E-02 |
| Growth and Proliferation, Embryonic Development, Organ Development, Organismal Development, Tissue Development                                       | development of pacemaker cells                                                         | 1,34E-02 |
| Cellular Development, Endocrine System Development and Function                                                                                      | differentiation of enteroendocrine cells                                               | 1,34E-02 |

|                                                                                                                                                                                                                                                                                                    |                                                           |          |
|----------------------------------------------------------------------------------------------------------------------------------------------------------------------------------------------------------------------------------------------------------------------------------------------------|-----------------------------------------------------------|----------|
| Cancer, Endocrine System Disorders, Organismal Injury and Abnormalities, Reproductive System Disease                                                                                                                                                                                               | formation of ovarian adenocarcinoma                       | 1,34E-02 |
| DNA Replication, Recombination, and Repair                                                                                                                                                                                                                                                         | hypercondensation of chromosomes                          | 1,34E-02 |
| Organ Development, Organ Morphology, Reproductive System Development and Function                                                                                                                                                                                                                  | induction of mammary gland                                | 1,34E-02 |
| Hereditary Disorder, Immunological Disease, Organismal Injury and Abnormalities                                                                                                                                                                                                                    | isolated immunodeficiency                                 | 1,34E-02 |
| Endocrine System Disorders, Gastrointestinal Disease, Immunological Disease, Metabolic Disease, Organismal Injury and Abnormalities                                                                                                                                                                | ketosis-prone diabetes mellitus                           | 1,34E-02 |
| Morphology, Organismal Development, Organismal Injury and Abnormalities, Skeletal and Muscular Disorders, Skeletal and Muscular System Development and Function, Endocrine System Disorders, Gastrointestinal Disease, Hereditary Disorder, Metabolic Disease, Organismal Injury and Abnormalities | lack of metacarpal bone                                   | 1,34E-02 |
| Cell Cycle                                                                                                                                                                                                                                                                                         | maturity-onset diabetes of the young type 9               | 1,34E-02 |
| Cell Cycle                                                                                                                                                                                                                                                                                         | polyploidization of epithelial cell lines                 | 1,34E-02 |
| Cell Cycle                                                                                                                                                                                                                                                                                         | polyploidization of kidney cell lines                     | 1,34E-02 |
| Cell Morphology, Nervous System Development and Function, Skeletal and Muscular System Development and Function                                                                                                                                                                                    | re-innervation of skeletal muscle                         | 1,34E-02 |
| Hereditary Disorder, Infectious Diseases, Organismal Injury and Abnormalities                                                                                                                                                                                                                      | recurrent isolated invasive pneumococcal disease type 2   | 1,34E-02 |
| Connective Tissue Disorders, Developmental Disorder, Hereditary Disorder, Organismal Injury and Abnormalities, Skeletal and Muscular Disorders                                                                                                                                                     | spondyloepimetaphyseal dysplasia with joint laxity type 2 | 1,34E-02 |
| Cardiac Stress Response, Cardiovascular Disease, Cellular Compromise, Organ Morphology, Organismal Injury and Abnormalities                                                                                                                                                                        | stress response of ventricular septum                     | 1,34E-02 |
| Cancer, Endocrine System Disorders, Organismal Injury and Abnormalities                                                                                                                                                                                                                            | thyroid gland fetal adenoma                               | 1,34E-02 |
| Developmental Disorder                                                                                                                                                                                                                                                                             | ulnar-mammary syndrome                                    | 1,34E-02 |
| DNA Replication, Recombination, and Repair                                                                                                                                                                                                                                                         | unwinding of origin of replication in the short region    | 1,34E-02 |
| Developmental Disorder, Hereditary Disorder, Neurological Disease, Organismal Injury and Abnormalities                                                                                                                                                                                             | X-linked mental retardation                               | 1,34E-02 |
| Cancer, Endocrine System Disorders, Organismal Injury and Abnormalities                                                                                                                                                                                                                            | Hurthle cell adenoma                                      | 1,37E-02 |
| Cell Morphology, Humoral Immune Response, Immunological Disease, Lymphoid Tissue Structure and Development, Tissue Morphology                                                                                                                                                                      | abnormal morphology of marginal-zone B lymphocytes        | 1,37E-02 |
| Organismal Development, Skeletal and Muscular System Development and Function                                                                                                                                                                                                                      | morphology of hindlimb                                    | 1,40E-02 |
| Infectious Diseases, Inflammatory Response, Organismal Injury and Abnormalities, Respiratory Disease                                                                                                                                                                                               | Pneumocystosis jiroveci pneumonia                         | 1,40E-02 |
| Endocrine System Development and Function, Organ Development                                                                                                                                                                                                                                       | proliferation of islets of Langerhans                     | 1,43E-02 |
| Cell Death and Survival, Gastrointestinal Disease, Hepatic System Disease, Liver Necrosis/Cell Death, Organismal Injury and Abnormalities                                                                                                                                                          | apoptosis of hepatocytes                                  | 1,44E-02 |
| Organ Morphology, Organismal Injury and Abnormalities, Reproductive System Development and Function, Reproductive System Disease                                                                                                                                                                   | abnormal morphology of vaginal opening                    | 1,46E-02 |
| Cell Cycle                                                                                                                                                                                                                                                                                         | metaphase/anaphase transition                             | 1,46E-02 |
| Cellular Assembly and Organization                                                                                                                                                                                                                                                                 | chromosomal congression of metaphase plate                | 1,49E-02 |
| Dermatological Diseases and Conditions, Organismal Injury and Abnormalities                                                                                                                                                                                                                        | disorder of hair                                          | 1,54E-02 |
| Embryonic Development, Organismal Development, Tissue Development                                                                                                                                                                                                                                  | morphogenesis of mesoderm                                 | 1,55E-02 |
| Gastrointestinal Disease, Inflammatory Disease                                                                                                                                                                                                                                                     | severe inflammatory bowel disease                         | 1,55E-02 |
| Cell Cycle                                                                                                                                                                                                                                                                                         | interaction of DNA                                        | 1,58E-02 |
| Cancer, Organismal Injury and Abnormalities                                                                                                                                                                                                                                                        | adenoma                                                   | 1,59E-02 |
| Cancer, Organismal Injury and Abnormalities, Reproductive System Disease                                                                                                                                                                                                                           | female genital tract serous carcinoma                     | 1,64E-02 |
| Cell Morphology, Cellular Assembly and Organization, DNA Replication, Recombination, and Repair                                                                                                                                                                                                    | abnormal morphology of mitotic spindle                    | 1,67E-02 |
| Cancer, Organismal Injury and Abnormalities, Respiratory Disease                                                                                                                                                                                                                                   | development of lung tumor                                 | 1,67E-02 |
| Cell Death and Survival                                                                                                                                                                                                                                                                            | apoptosis of placenta                                     | 1,68E-02 |
| Dermatological Diseases and Conditions, Inflammatory Disease, Inflammatory Response, Organismal Injury and Abnormalities                                                                                                                                                                           | erythroderma                                              | 1,71E-02 |



|                                                                                                                                                                                                                                             |                                                      |          |
|---------------------------------------------------------------------------------------------------------------------------------------------------------------------------------------------------------------------------------------------|------------------------------------------------------|----------|
| Organ Morphology, Respiratory System Development and Function, Tissue Morphology                                                                                                                                                            | quantity of alveolar type I cells                    | 1,71E-02 |
| Gastrointestinal Disease, Organismal Injury and Abnormalities                                                                                                                                                                               | steatorrhea                                          | 1,71E-02 |
| Cell Morphology, Skeletal and Muscular System Development and Function                                                                                                                                                                      | elongation of muscle cells                           | 1,80E-02 |
| Cellular Assembly and Organization                                                                                                                                                                                                          | formation of mitochondrial cristae                   | 1,83E-02 |
| Dermatological Diseases and Conditions, Organ Morphology, Organismal Injury and Abnormalities                                                                                                                                               | abnormal morphology of suprabasal layer of epidermis | 1,86E-02 |
| Gene Expression                                                                                                                                                                                                                             | binding of androgen-responsive element               | 1,86E-02 |
| Cell-To-Cell Signaling and Interaction, Cell-mediated Immune Response, Hematological System Development and Function, Inflammatory Response                                                                                                 | cytotoxic reaction of natural killer cells           | 1,92E-02 |
| Immunological Disease, Lymphoid Tissue Structure and Development, Organ Morphology, Organismal Injury and Abnormalities, Tissue Morphology                                                                                                  | abnormal morphology of T-cell zone                   | 1,95E-02 |
| Cancer, Dermatological Diseases and Conditions, Organismal Injury and Abnormalities Development and Function, Hepatic System Disease, Inflammatory Disease, Inflammatory Response, Liver Inflammation/Hepatitis, Liver Steatosis, Metabolic | hyperplasia of keratinocytes                         | 1,95E-02 |
|                                                                                                                                                                                                                                             | steatohepatitis                                      | 1,98E-02 |
| Cell Cycle                                                                                                                                                                                                                                  | M phase                                              | 2,09E-02 |
| Gene Expression                                                                                                                                                                                                                             | transcription of RNA                                 | 2,09E-02 |
| Drug Metabolism, Endocrine System Development and Function, Lipid Metabolism, Small Molecule Biochemistry                                                                                                                                   | binding of progesterone                              | 2,14E-02 |
| Cardiovascular System Development and Function, Organismal Development                                                                                                                                                                      | vascularization of blood vessel                      | 2,14E-02 |
| Dermatological Diseases and Conditions, Hair and Skin Development and Function, Organ Morphology, Organismal Injury and Abnormalities                                                                                                       | abnormal morphology of fur                           | 2,17E-02 |
| Organ Development, Organ Morphology, Organismal Development, Skeletal and Muscular System Development and Function                                                                                                                          | mass of soleus muscle                                | 2,23E-02 |
| Cellular Assembly and Organization                                                                                                                                                                                                          | attachment of spindle fibers                         | 2,38E-02 |
| Cardiovascular Disease, Neurological Disease, Organismal Injury and Abnormalities                                                                                                                                                           | damage of blood-brain barrier                        | 2,38E-02 |
| Cell Cycle, Reproductive System Development and Function                                                                                                                                                                                    | meiosis of spermatocytes                             | 2,38E-02 |
| Molecular Transport                                                                                                                                                                                                                         | transport of Zn <sup>2+</sup>                        | 2,38E-02 |
| Digestive System Development and Function, Hepatic System Development and Function, Organ Development                                                                                                                                       | function of liver                                    | 2,42E-02 |
| Post-Translational Modification, Protein Synthesis                                                                                                                                                                                          | tetramerization of protein                           | 2,43E-02 |
| Lipid Metabolism, Small Molecule Biochemistry, Vitamin and Mineral Metabolism                                                                                                                                                               | catabolism of cholesterol                            | 2,44E-02 |
| Cell Death and Survival                                                                                                                                                                                                                     | loss of exocrine cells                               | 2,44E-02 |
| Lipid Metabolism, Small Molecule Biochemistry                                                                                                                                                                                               | binding of lipid                                     | 2,46E-02 |
| Connective Tissue Disorders, Organismal Injury and Abnormalities, Tissue Morphology                                                                                                                                                         | lack of subcutaneous fat                             | 2,48E-02 |
| Developmental Disorder, Organismal Injury and Abnormalities, Reproductive System Disease                                                                                                                                                    | hypoplasia of mammary gland                          | 2,54E-02 |
| Embryonic Development, Organ Development, Organismal Development, Respiratory System Development and Function, Tissue Development                                                                                                           | maturation of lung                                   | 0,03     |
| Cellular Movement                                                                                                                                                                                                                           | translocation of bacteria                            | 2,72E-02 |
| Cancer                                                                                                                                                                                                                                      | sphere formation of breast cancer cell lines         | 2,84E-02 |
| Cardiovascular System Development and Function, Embryonic Development, Organ Development, Organismal Development, Tissue Development                                                                                                        | formation of endocardium                             | 2,87E-02 |
| Reproductive System Development and Function                                                                                                                                                                                                | morphology of reproductive system                    | 3,02E-02 |
| Cell Cycle, Connective Tissue Development and Function                                                                                                                                                                                      | ploidy of fibroblast cell lines                      | 3,02E-02 |
| Cell Morphology, Nervous System Development and Function, Neurological Disease, Tissue Morphology                                                                                                                                           | abnormal morphology of mossy fibers                  | 3,05E-02 |
| Cell-To-Cell Signaling and Interaction, Hematological System Development and Function                                                                                                                                                       | binding of B-lymphocyte derived cell lines           | 3,08E-02 |
| Cell Morphology, Lymphoid Tissue Structure and Development                                                                                                                                                                                  | morphology of lymphatic system cells                 | 3,12E-02 |

|                                                                                                                                                               |                                                     |          |
|---------------------------------------------------------------------------------------------------------------------------------------------------------------|-----------------------------------------------------|----------|
| Cancer, Gastrointestinal Disease, Hepatic System Disease, Hepatocellular Carcinoma, Liver Hyperplasia/Hyperproliferation, Organismal Injury and Abnormalities | growth of hepatocellular carcinoma                  | 3,17E-02 |
| Cell Cycle, Cellular Assembly and Organization, DNA Replication, Recombination, and Repair                                                                    | segregation of mitotic sister chromatids            | 3,18E-02 |
| Developmental Disorder, Embryonic Development, Organismal Development, Tissue Morphology                                                                      | abnormal morphology of vitelline vessel             | 3,22E-02 |
| Cellular Assembly and Organization                                                                                                                            | attachment of kinetochores                          | 3,33E-02 |
| Cell Cycle, DNA Replication, Recombination, and Repair                                                                                                        | spindle checkpoint of mitotic cells                 | 3,39E-02 |
| Developmental Disorder, Embryonic Development, Organismal Development, Tissue Morphology                                                                      | abnormal morphology of neural plate                 | 3,48E-02 |
| Cardiovascular System Development and Function, Cell Morphology, Embryonic Development                                                                        | branching morphogenesis of vasculature              | 3,54E-02 |
| Embryonic Development, Tissue Development                                                                                                                     | proliferation of embryoblast                        | 3,54E-02 |
| Cancer, Organismal Functions, Organismal Injury and Abnormalities, Tumor Morphology                                                                           | suppression of malignant tumor                      | 3,54E-02 |
| Connective Tissue Disorders, Organismal Injury and Abnormalities, Tissue Morphology                                                                           | abnormal morphology of adipose tissue               | 3,57E-02 |
| Embryonic Development, Organ Development, Organ Morphology, Organismal Development, Reproductive System Development and Function, Tissue Development          | morphogenesis of male genital organ                 | 3,57E-02 |
| Development and Function, Skeletal and Muscular System Development and Function, Tissue Development                                                           | osteoclastogenesis of osteoclast precursor cells    | 3,60E-02 |
| Hereditary Disorder, Organismal Injury and Abnormalities                                                                                                      | X-linked hereditary disease                         | 3,62E-02 |
| Organ Morphology, Respiratory System Development and Function, Tissue Morphology                                                                              | quantity of type II pneumocytes                     | 3,63E-02 |
| Energy Production, Nucleic Acid Metabolism, Small Molecule Biochemistry                                                                                       | binding of ATP                                      | 3,66E-02 |
| Cardiovascular System Development and Function                                                                                                                | ejection fraction of left ventricle                 | 3,81E-02 |
| Cancer, Gastrointestinal Disease, Hepatic System Disease, Liver Hyperplasia/Hyperproliferation, Organismal Injury and Abnormalities                           | liver cancer                                        | 3,92E-02 |
| Cardiac Enlargement, Cardiovascular System Development and Function, Organ Morphology, Organismal Development                                                 | enlargement of left ventricle                       | 3,96E-02 |
| Gene Expression                                                                                                                                               | transcription of DNA                                | 4,00E-02 |
| Cellular Development, Skeletal and Muscular System Development and Function, Tissue Development                                                               | differentiation of myoblasts                        | 4,01E-02 |
| Cancer, Organismal Injury and Abnormalities, Renal and Urological Disease                                                                                     | transitional cell bladder cancer                    | 4,04E-02 |
| Cellular Assembly and Organization, Cellular Compromise, DNA Replication, Recombination, and Repair                                                           | formation of nuclear inclusions                     | 4,05E-02 |
| Cell Cycle, Respiratory System Development and Function                                                                                                       | arrest in cell cycle progression of lung cell lines | 4,08E-02 |
| Cancer, Organismal Injury and Abnormalities, Reproductive System Disease                                                                                      | tumorigenesis of breast adenocarcinoma              | 4,08E-02 |
| Cardiovascular System Development and Function, Hematological System Development and Function                                                                 | end diastolic pressure of left ventricle            | 4,17E-02 |
| Cellular Development, Skeletal and Muscular System Development and Function, Tissue Development                                                               | differentiation of muscle cells                     | 4,20E-02 |
| Embryonic Development, Organ Development, Organ Morphology, Organismal Development, Reproductive System Development and Function, Tissue Development          | morphology of mammary alveolus                      | 4,20E-02 |
| Dermatological Diseases and Conditions, Organismal Injury and Abnormalities                                                                                   | parakeratosis                                       | 4,20E-02 |
| Dermatological Diseases and Conditions, Hair and Skin Development and Function, Organ Morphology, Organismal Injury and Abnormalities                         | abnormal appearance of fur                          | 4,32E-02 |
| Post-Translational Modification                                                                                                                               | ubiquitination of protein                           | 4,33E-02 |
| Organismal Development, Reproductive System Development and Function                                                                                          | development of reproductive system                  | 4,34E-02 |
| Gastrointestinal Disease, Hepatic System Disease, Organismal Injury and Abnormalities                                                                         | jaundice                                            | 4,38E-02 |
| Lipid Metabolism, Molecular Transport, Small Molecule Biochemistry                                                                                            | accumulation of fat                                 | 4,44E-02 |
| Cardiovascular Disease, Organismal Injury and Abnormalities                                                                                                   | atrial ventricular block                            | 4,44E-02 |
| Organismal Development                                                                                                                                        | development of genitourinary system                 | 4,50E-02 |
| Cell Morphology, Cellular Function and Maintenance                                                                                                            | autophagy of fibroblasts                            | 4,62E-02 |

|                                                                                                                                                                    |                                                  |          |
|--------------------------------------------------------------------------------------------------------------------------------------------------------------------|--------------------------------------------------|----------|
| DNA Replication, Recombination, and Repair                                                                                                                         | condensation of chromosomes                      | 4,68E-02 |
| Developmental Disorder, Embryonic Development, Organismal Survival                                                                                                 | death of embryo                                  | 4,82E-02 |
| Embryonic Development, Organismal Development, Tissue Development                                                                                                  | development of heart tube                        | 4,83E-02 |
| Endocrine System Disorders, Gastrointestinal Disease, Hereditary Disorder, Metabolic Disease, Organismal Injury and Abnormalities                                  | familial non-insulin-dependent diabetes mellitus | 4,83E-02 |
| Embryonic Development, Organismal Development                                                                                                                      | specification of rostrocaudal axis               | 4,86E-02 |
| Cellular Development                                                                                                                                               | immortalization of fibroblast cell lines         | 4,95E-02 |
| Cell Cycle                                                                                                                                                         | delay in mitosis of cervical cancer cell lines   | 4,98E-02 |
| Cell Death and Survival, Cellular Development, Cellular Function and Maintenance, Cellular Growth and Proliferation, Embryonic Development, Organismal Development | self-renewal of embryonic stem cells             | 4,98E-02 |
| Cell Death and Survival, Organismal Injury and Abnormalities, Renal Necrosis/Cell Death, Renal and Urological Disease                                              | cell death of kidney cell lines                  | 6,29E-02 |
| Cardiac Dysfunction, Cardiac Fibrosis, Cardiovascular Disease, Organismal Injury and Abnormalities                                                                 | interstitial fibrosis of left ventricle          | 9,00E-02 |
| Liver Hyperplasia/Hyperproliferation, Organismal Injury and Abnormalities, Tissue Morphology                                                                       | quantity of hepatocellular carcinoma             | 9,00E-02 |
| Cancer, Gastrointestinal Disease, Hepatic System Disease, Hepatocellular Carcinoma, Liver Hyperplasia/Hyperproliferation, Organismal Injury and Abnormalities      | hepatocellular carcinoma                         | 9,73E-02 |
| Cardiovascular Disease, Heart Failure, Organismal Injury and Abnormalities                                                                                         | failure of heart                                 | 1,12E-01 |
| Gastrointestinal Disease, Hepatic System Disease, Liver Fibrosis, Organismal Injury and Abnormalities                                                              | fibrosis of liver                                | 1,12E-01 |
| Cardiac Necrosis/Cell Death, Cardiovascular Disease, Cell Death and Survival, Organismal Injury and Abnormalities, Skeletal and Muscular Disorders                 | apoptosis of cardiomyocytes                      | 1,50E-01 |
| Cancer, Gastrointestinal Disease, Hepatic System Disease, Liver Hyperplasia/Hyperproliferation, Organismal Injury and Abnormalities                                | liver carcinoma                                  | 1,86E-01 |
| Hepatic System Development and Function, Liver Proliferation, Organ Morphology, Tissue Morphology                                                                  | quantity of hepatocytes                          | 2,15E-01 |
| Cardiac Arrhythmia, Cardiovascular Disease, Organismal Injury and Abnormalities                                                                                    | arrhythmia                                       | 2,35E-01 |
| Cardiovascular Disease, Congenital Heart Anomaly, Developmental Disorder, Organismal Injury and Abnormalities                                                      | congenital heart disease                         | 2,42E-01 |
| Gastrointestinal Disease, Hepatic System Disease, Liver Steatosis, Metabolic Disease, Organismal Injury and Abnormalities                                          | hepatic steatosis                                | 2,89E-01 |
| Cell Death and Survival, Organismal Injury and Abnormalities, Renal Necrosis/Cell Death, Renal and Urological Disease                                              | apoptosis of kidney cell lines                   | 3,29E-01 |
| Cardiac Necrosis/Cell Death, Cardiovascular Disease, Cell Death and Survival, Organismal Injury and Abnormalities, Skeletal and Muscular Disorders                 | apoptosis of ventricular myocytes                | 3,42E-01 |
| Cardiovascular Disease, Congenital Heart Anomaly, Developmental Disorder, Organismal Injury and Abnormalities                                                      | failure of heart looping                         | 3,42E-01 |
| Cardiac Arrhythmia, Cardiovascular Disease, Organismal Injury and Abnormalities                                                                                    | long-QT syndrome                                 | 3,59E-01 |
| Gastrointestinal Disease, Hepatic System Disease, Liver Cholestasis                                                                                                | cholestasis                                      | 3,93E-01 |
| Cancer, Gastrointestinal Disease, Hepatic System Disease, Liver Hyperplasia/Hyperproliferation, Organismal Injury and Abnormalities                                | tumorigenesis of liver tumor                     | 4,25E-01 |
| Cancer, Gastrointestinal Disease, Hepatic System Disease, Hepatocellular Carcinoma, Liver Hyperplasia/Hyperproliferation, Organismal Injury and Abnormalities      | incidence of hepatocellular carcinoma            | 5,17E-01 |
